# Supplementary material for: Copper-catalyzed 4-HO-TEMPOH mediated phosphorylation of alkenes
Source: Royal Society of Chemistry journal article supplement (doi:10.1039/d3ob00607g), 2023-01-01

## Supporting Information

### Copper-catalyzed 4-HO-TEMPOH mediated phosphorylation of alkenes

Jun-Long Zhan,<sup>\*, a</sup> Bing-Jie Wang,<sup>a</sup> Chen-Xi Wang,<sup>a</sup> Xin-Ming Zhao,<sup>a</sup> Sai-Nan Zhou,<sup>a</sup>  
Zao-Zao Dou,<sup>a</sup> Xin-Xin Yang,<sup>a</sup> Lin Zhu,<sup>\*, a</sup> Wei Ren<sup>b</sup>

<sup>a</sup>Henan Provincial Engineering and Technology Research Center for Precise Synthesis of Fluorine-Containing Drugs. College of Chemistry and Chemical Engineering, Anyang Normal University, Anyang, Henan 455000, P. R. China. E-mail: zhanjl13@126.com, zhanjl15@lzu.edu.cn, zhulin1231989@163.com.

<sup>b</sup>Henan Scientific Research Platform Service Center, Zhengzhou, Henan 450000, P. R. China.

|                                                                          |      |
|--------------------------------------------------------------------------|------|
| • Contents                                                               | page |
| • General                                                                | S2   |
| • Optimization Screens for alkene phosphorylation                        | S2   |
| • Substrates preparation                                                 | S3   |
| • General experimental procedure                                         | S3   |
| • Late-stage functionalization of complex bioactive molecules            | S3   |
| • The unsuccessful substrates for this reaction                          | S4   |
| • Control experiments                                                    | S4   |
| • The NOE experiment of <b>3y</b>                                        | S5   |
| • References                                                             | S6   |
| • Analytical data for products                                           | S7   |
| • Copies of <sup>1</sup> H, <sup>13</sup> C, and <sup>31</sup> P spectra | S20  |

## General:

All reagents were purchased from commercial suppliers and used without further purification. Flash chromatography was carried out with silica gel (200-300 mesh). Analytical TLC was performed with silica gel GF254 plates, and the products were visualized by UV detection.  $^1\text{H}$  NMR (400 MHz) and  $^{13}\text{C}$  NMR (100 MHz) spectra were recorded in  $\text{CDCl}_3$ . Chemical shifts ( $\delta$ ) are reported in ppm using TMS as internal standard and spin-spin coupling constants ( $J$ ) are given in Hz. Proton, carbon and phosphorus multiplicity are recorded as singlet (s), doublet (d), triplet (t), quartet (q), multiplet (m) and broad (brs). Melting points were obtained with a micro melting point XT4A Beijing Keyi electrooptic apparatus and uncorrected. The high-resolution mass spectra (HRMS) were measured on a Waters LCT Premierxe<sup>TM</sup> spectrometer by ESI.

## Optimization Screens for alkene phosphorylation reaction conditions:

**Table S1.** Screening of catalysts.<sup>a</sup>

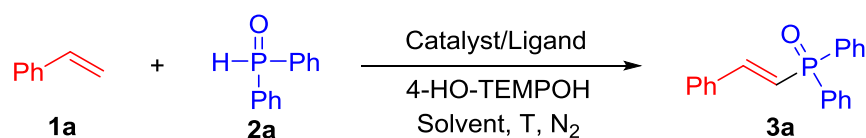

| Entry | catalyst (mol%)       | Ligand (mol%) | Solvent     | Yield (%) <sup>b</sup> |
|-------|-----------------------|---------------|-------------|------------------------|
| 1     | CuBr                  | 2,2'-Bpy      | 1,4-Dioxane | 62                     |
| 2     | CuBr <sub>2</sub>     | 2,2'-Bpy      | 1,4-Dioxane | 51                     |
| 3     | Cu(OAc) <sub>2</sub>  | 2,2'-Bpy      | 1,4-Dioxane | 16                     |
| 4     | Cu(OTf) <sub>2</sub>  | 2,2'-Bpy      | 1,4-Dioxane | 31                     |
| 5     | CuI                   | 2,2'-Bpy      | 1,4-Dioxane | 28                     |
| 6     | CuCl                  | 2,2'-Bpy      | 1,4-Dioxane | 35                     |
| 7     | Fe(acac) <sub>3</sub> | 2,2'-Bpy      | 1,4-Dioxane | < 5                    |
| 8     | FeCl <sub>2</sub>     | 2,2'-Bpy      | 1,4-Dioxane | 12                     |
| 9     | Fe(OAc) <sub>2</sub>  | 2,2'-Bpy      | 1,4-Dioxane | 12                     |
| 10    | Fe(OTf) <sub>3</sub>  | 2,2'-Bpy      | 1,4-Dioxane | 19                     |

<sup>a</sup> All reactions were carried out by stirring a mixture of **1a** (0.3 mmol), **2a** (0.2 mmol), catalyst (20 mol%), 2,2'-bpy (20 mol%) and 4-HO-TEMPOH (2.5 equiv.) in 2 mL 1,4-dioxane under N<sub>2</sub> atmosphere at 80 °C for 12 h unless noted otherwise. <sup>b</sup> Isolated yield.

## Substrates preparation:

Unless otherwise stated, starting materials were purchased from Adamas, 3A Materials, TCI or Energy-Chemical and used without further purification. The following starting materials were prepared according to the procedures described previously in the literatures: **1ac**,<sup>[1]</sup> **1ad-ag**,<sup>[2]</sup> **1ah**,<sup>[3]</sup> 2,2,6,6-tetramethylpiperidin-1-ol (TEMPOH) and 2,2,6,6-tetramethylpiperidine-1,4-diol (4-HO-TEMPOH).<sup>[4]</sup>

## General experimental procedure:

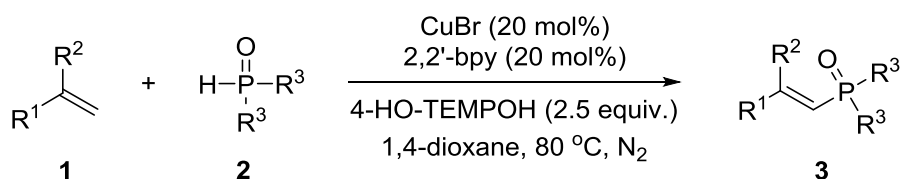

A 25 mL oven-dried reaction tube were charged with alkenes **1** (0.5 mmol, 2.5 equiv.), P(O)H compounds **2** (0.2 mmol), CuBr (20 mmol%), 2,2'-bpy (20 mmol%), 4-HO-TEMPOH (0.5 mmol, 2.5 equiv.) and 2 mL 1,4-dioxane. The tube was then sealed and the displacement of N<sub>2</sub> gas for three times. Then the mixture was stirred for 12 h at 80 °C. Upon completion of the reaction, the solvent was then removed under vacuo. The residue was purified with chromatography column on silica gel (gradient eluent of EtOAc/petroleum ether: 1/2 to 2/1) to give the corresponding products in yields listed in Table 2. The identity and purity of the products were confirmed by <sup>1</sup>H, <sup>13</sup>C and <sup>31</sup>P spectroscopic analysis.

## Late-stage functionalization of complex bioactive molecules:

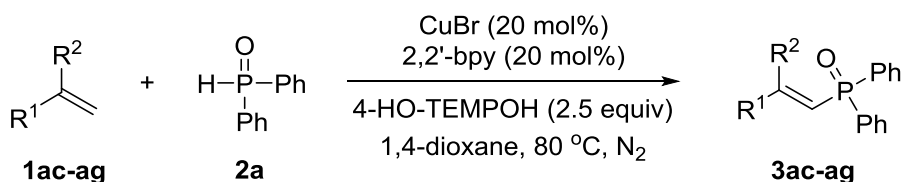

A 25 mL oven-dried reaction tube were charged with alkenes **1ac-ag** (0.5 mmol, 2.5 equiv.), diphenylphosphine oxide **2a** (0.2 mmol), CuBr (20 mmol%), 2,2'-bpy (20 mmol%), 4-HO-TEMPOH (0.5 mmol, 2.5 equiv.) and 2 mL 1,4-dioxane. The tube was then sealed and the displacement of N<sub>2</sub> gas for three times. Then the mixture was stirred for 12 h at 80 °C. Upon completion of the reaction, the solvent was then removed under vacuo. The

residue was purified with chromatography column on silica gel (gradient eluent of EtOAc/petroleum ether: 1/2 to 2/1) to give the corresponding products in yields listed in Table 3. The identity and purity of the products were confirmed by  $^1\text{H}$ ,  $^{13}\text{C}$  and  $^{31}\text{P}$  spectroscopic analysis.

### The unsuccessful substrates for this reaction:

**Table S2.** The unsuccessful substrates.

1) The alkenes

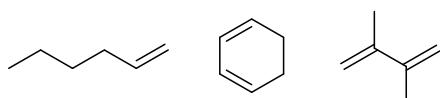

2) The P species

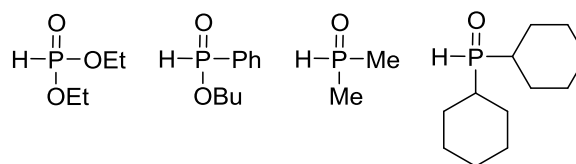

### Control experiments:

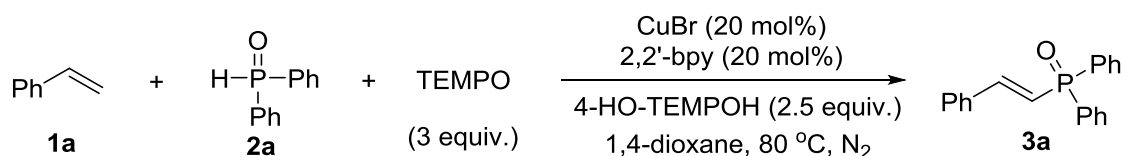

A 25 mL oven-dried reaction tube were charged with alkenes **1a** (0.5 mmol, 2.5 equiv.), diphenylphosphine oxide **2a** (0.2 mmol), CuBr (20 mmol%), 2,2'-bpy (20 mmol%), 4-HO-TEMPOH (0.5 mmol, 2.5 equiv.), TEMPO (3 equiv.) and 2 mL 1,4-dioxane. The tube was then sealed and the displacement of  $\text{N}_2$  gas for three times. Then the mixture was stirred for 12 h at 80 °C. The reaction was almost fully suppressed and a little product was detected (< 5 %).

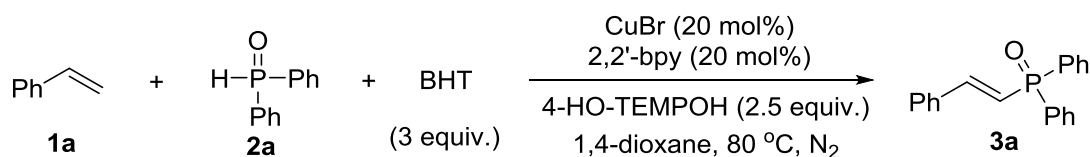

A 25 mL oven-dried reaction tube were charged with alkenes **1a** (0.5 mmol, 2.5 equiv.), diphenylphosphine oxide **2a** (0.2 mmol), CuBr (20 mmol%), 2,2'-bpy (20 mmol%), 4-HO-TEMPOH (0.5 mmol, 2.5 equiv.), BHT (3 equiv.) and 2 mL 1,4-dioxane. The tube was then sealed and the displacement of  $\text{N}_2$  gas for three times. Then the mixture was stirred for 12 h at 80 °C. The reaction was almost fully suppressed and a little product was detected (< 5 %).

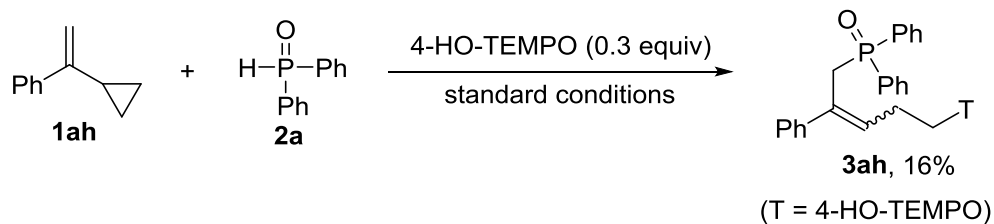

A 25 mL oven-dried reaction tube was charged with (1-cyclopropylvinyl)benzene **1ah** (0.5 mmol, 2.5 equiv), diphenylphosphine oxide (0.2 mmol), CuBr (20 mmol%), 2,2'-bpy (20 mmol%), 4-HO-TEMPOH (0.5 mmol, 2.5 equiv.), 4-HO-TEMPO (0.3 equiv.) and 2 mL 1,4-dioxane. The tube was then sealed and the displacement of N<sub>2</sub> gas for three times. Next, the mixture was stirred at 80 °C for 12 h. The reaction mixture was isolated by silica gel column chromatography to give the ring-opening product **3ah** in 16% yield.

### The NOE experiment of **3y**:

The product **3y** may have two different structures as shown in below. In order to identify the configuration of **3y**, the NOE experiment has been conducted and the result is shown as below:

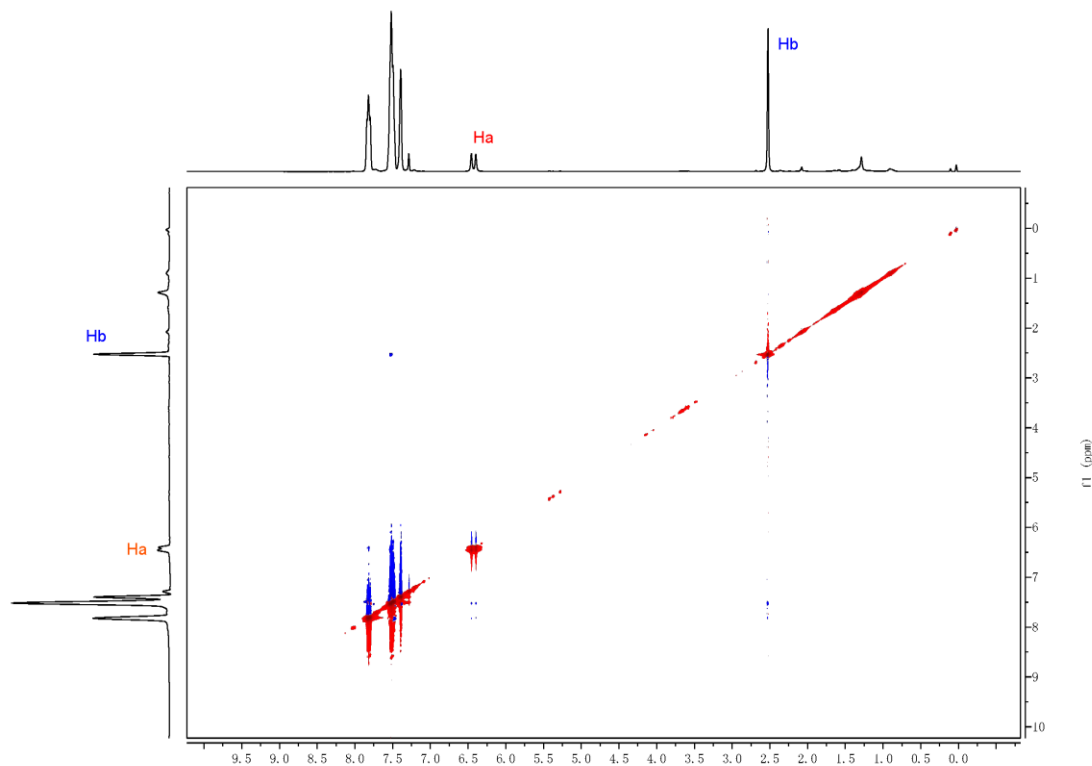

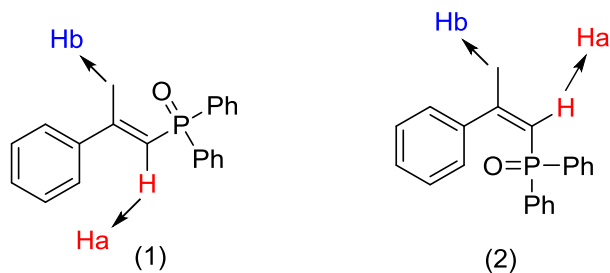

From above NOE experiment, we found that Ha and Hb are not adjacent in space. Thus, the structure 2 (Z isomer) could be excluded and the product **3y** should be E-isomer as reported.

### References:

- (1) M. E. Norako, M. J. Greaney and R. L. Brutchey, Synthesis and characterization of wurtzite-phase copper tin selenide nanocrystals. *J. Am. Chem. Soc.*, 2012, **134**, 23-26.
- (2) (a) F. Chen, Y.-T. Tang, X.-R. Li, Y.-Y. Duan, C.-X. Chen and Y. Zheng, Oxoammonium salt-mediated vicinal oxyazidation of alkenes with  $\text{NaN}_3$ : Access to  $\beta$ -aminooxy azides. *Adv. Syn. Catal.*, 2021, **363**, 5079-5084. (b) X. Yin, B. Chen, F. Qiu, X. Wang, Y. Liao, M. Wang, X. Lei and J. Liao, Enantioselective palladium-catalyzed hydrofluorination of alkenylarenes. *ACS Catal.*, 2020, **10**, 1954-1960. (c) Y. Zheng, Q.-Y. Yang, L.-Y. Wu, X.-Y. Zhu, M.-J. Ge, H. Yang, S.-Y. Liu and F. Chen, Oxoammonium salt-mediated regioselective vicinal dioxidation of alkenes: relying on transient and persistent nitroxides. *Org. Lett.*, 2021, **23**, 8533-8538.
- (3) (a) C. Chen, X. Shen, J. Chen, X. Hong and Z. Lu, Iron-catalyzed hydroboration of vinylcyclopropanes. *Org. Lett.*, 2017, **19**, 5422-5425. (b) W.-S. Zhang, D.-W. Ji, Y. Li, X.-X. Zhang, C.-Y. Zhao, Y.-C. Hu and Q.-A. Chen, Regio- and stereoselective diarylation of 1,3-dienes via Ni/Cr cocatalysis. *ACS Catal.*, 2022, **12**, 2158-2165.
- (4) (a) W. Lu and Z. Shen, Direct synthesis of alkenylboronates from alkenes and pinacol diboron via copper catalysis. *Org. Lett.*, 2019, **21**, 142-146. (b) L. Zhu, D. Song, Y.-H. Liu, M.-D. Chen, X.-R. Zhang, M.-Y. You and J.-L. Zhan, Iron-catalyzed regioselective synthesis of (*E*)-vinyl sulfones mediated by unprotected hydroxylamines. *Org. Biomol. Chem.*, 2022, **20**, 9127-9131.

## Analytical data for products:

### ***(E)*-Diphenyl(styryl)phosphine oxide (3a)**

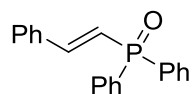

White solid; (46 mg, 75%); mp: 166–170 °C;  $R_f$  = 0.44 (hexanes/ethyl acetate 1:2);  $^1\text{H}$  NMR (400 MHz,  $\text{CDCl}_3$ ):  $\delta$  7.78–7.73 (m, 4H), 7.54–7.46 (m, 9H), 7.38–7.37 (m, 3H), 6.84 (dd,  $J$  = 17.6 Hz,  $J$  = 22.4 Hz, 1H);  $^{13}\text{C}$  NMR (100 MHz,  $\text{CDCl}_3$ ):  $\delta$  146.9 (d,  $J_{\text{C-P}}$  = 3.0 Hz), 134.4 (d,  $J_{\text{C-P}}$  = 18.0 Hz), 132.2 (d,  $J_{\text{C-P}}$  = 105.0 Hz), 131.3 (d,  $J_{\text{C-P}}$  = 2.0 Hz), 130.7 (d,  $J_{\text{C-P}}$  = 9.0 Hz), 129.5, 128.2, 128.0 (d,  $J_{\text{C-P}}$  = 12.0 Hz), 127.1, 118.5 (d,  $J_{\text{C-P}}$  = 104.0 Hz);  $^{31}\text{P}$  NMR ( $\text{CDCl}_3$ , 162 MHz): 24.7; ESI-HRMS (ESI,  $m/z$ ): Calcd for  $\text{C}_{20}\text{H}_{18}\text{OP}$ ,  $[\text{M} + \text{H}]^+$ : 305.1090, found 305.1087.

### ***(E)*-(4-Methylstyryl)diphenylphosphine oxide (3b)**

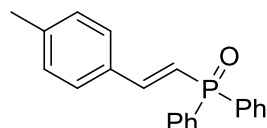

White solid; (53 mg, 83%); mp: 210–213 °C;  $R_f$  = 0.42 (hexanes/ethyl acetate 1:2);  $^1\text{H}$  NMR (400 MHz,  $\text{CDCl}_3$ ):  $\delta$  7.75 (dd,  $J$  = 7.6 Hz,  $J$  = 12.0 Hz, 4H), 7.55–7.41 (m, 9H), 7.18 (d,  $J$  = 8.0 Hz, 2H), 6.77 (dd,  $J$  = 17.2 Hz,  $J$  = 22.4 Hz, 1H), 2.36 (s, 3H);  $^{13}\text{C}$  NMR (100 MHz,  $\text{CDCl}_3$ ):  $\delta$  147.5 (d,  $J_{\text{C-P}}$  = 4.0 Hz), 140.4, 133.1 (d,  $J_{\text{C-P}}$  = 105.0 Hz), 132.4 (d,  $J_{\text{C-P}}$  = 18.0 Hz), 131.8 (d,  $J_{\text{C-P}}$  = 3.0 Hz), 131.4 (d,  $J_{\text{C-P}}$  = 10.0 Hz), 129.5 (d,  $J_{\text{C-P}}$  = 12.0 Hz), 127.7, 117.8 (d,  $J_{\text{C-P}}$  = 105.0 Hz), 21.4;  $^{31}\text{P}$  NMR ( $\text{CDCl}_3$ , 162 MHz): 24.7; ESI-HRMS (ESI,  $m/z$ ): Calcd for  $\text{C}_{21}\text{H}_{20}\text{OP}$ ,  $[\text{M} + \text{H}]^+$ : 319.1246, found 319.1247.

### ***(E)*-(4-(tert-Butyl)styryl)diphenylphosphine oxide (3c)**

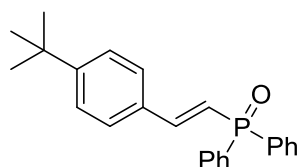

White solid; (61 mg, 85%); mp: 160–163 °C;  $R_f$  = 0.55 (hexanes/ethyl acetate 1:2);  $^1\text{H}$  NMR (400 MHz,  $\text{CDCl}_3$ ):  $\delta$  7.75 (dd,  $J$  = 7.6 Hz,  $J$  = 12.0 Hz, 4H), 7.55–7.44 (m, 9H), 7.40 (d,  $J$  = 8.0 Hz, 2H), 6.79 (dd,  $J$  = 17.2 Hz,  $J$  = 22.4 Hz, 1H), 1.32 (s, 9H);  $^{13}\text{C}$  NMR (100 MHz,

CDCl<sub>3</sub>):  $\delta$  153.6, 147.5 (d,  $J_{C-P}$  = 4.0 Hz), 132.9 (d,  $J_{C-P}$  = 106.0 Hz), 132.4 (d,  $J_{C-P}$  = 18.0 Hz), 131.8 (d,  $J_{C-P}$  = 2.0 Hz), 131.4 (d,  $J_{C-P}$  = 10.0 Hz), 128.6 (d,  $J_{C-P}$  = 12.0 Hz), 127.6, 125.8, 117.9 (d,  $J_{C-P}$  = 105.0 Hz), 34.8, 31.3; <sup>31</sup>P NMR (CDCl<sub>3</sub>, 162 MHz): 25.1; ESI-HRMS (ESI, m/z): Calcd for C<sub>24</sub>H<sub>26</sub>OP, [M + H]<sup>+</sup>: 361.1716, found 361.1718.

**(E)-(4-Methoxystyryl)diphenylphosphine oxide (3d)**

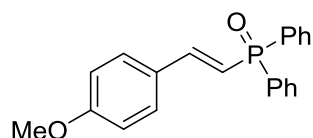

White solid; (50 mg, 74%); mp: 189–193 °C; R<sub>f</sub> = 0.40 (hexanes/ethyl acetate 1:2); <sup>1</sup>H NMR (400 MHz, CDCl<sub>3</sub>):  $\delta$  7.58–7.73 (m, 4H), 7.55–7.51 (m, 2H), 7.49–7.38 (m, 7H), 6.89 (d,  $J$  = 8.8 Hz, 2H), 6.66 (dd,  $J$  = 17.2 Hz,  $J$  = 22.4 Hz, 1H), 3.82 (s, 3H); <sup>13</sup>C NMR (100 MHz, CDCl<sub>3</sub>):  $\delta$  161.1, 147.2 (d,  $J_{C-P}$  = 4.0 Hz), 133.0 (d,  $J_{C-P}$  = 105.0 Hz), 131.7 (d,  $J_{C-P}$  = 3.0 Hz), 131.3 (d,  $J_{C-P}$  = 10 Hz), 129.3, 128.5 (d,  $J_{C-P}$  = 12 Hz), 127.8 (d,  $J_{C-P}$  = 19 Hz), 115.8 (d,  $J_{C-P}$  = 106.0 Hz), 114.2, 55.3; <sup>31</sup>P NMR (CDCl<sub>3</sub>, 162 MHz): 25.4; ESI-HRMS (ESI, m/z): Calcd for C<sub>21</sub>H<sub>19</sub>NaO<sub>2</sub>P, [M + Na]<sup>+</sup>: 357.1015, found 357.1019.

**(E)-(4-Phenoxystyryl)diphenylphosphine oxide (3e)**

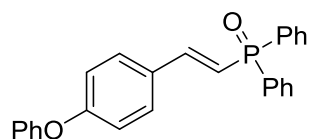

White solid; (58 mg, 73%); mp: 155–158 °C; R<sub>f</sub> = 0.47 (hexanes/ethyl acetate 1:2); <sup>1</sup>H NMR (400 MHz, CDCl<sub>3</sub>):  $\delta$  7.76 (dd,  $J$  = 7.6 Hz,  $J$  = 12 Hz, 4H), 7.55–7.42 (m, 9H), 7.35 (t,  $J$  = 8.0 Hz, 2H), 7.14 (t,  $J$  = 7.2 Hz, 1H), 7.03 (d,  $J$  = 8.0 Hz, 2H), 6.98 (d,  $J$  = 8.4 Hz, 2H), 6.73 (dd,  $J$  = 17.2 Hz,  $J$  = 22.4 Hz, 1H); <sup>13</sup>C NMR (100 MHz, CDCl<sub>3</sub>):  $\delta$  159.1, 156.1, 146.6 (d,  $J_{C-P}$  = 4.0 Hz), 132.9 (d,  $J_{C-P}$  = 105.0 Hz), 131.7 (d,  $J_{C-P}$  = 2.0 Hz), 131.2 (d,  $J_{C-P}$  = 9.0 Hz), 129.9 (d,  $J_{C-P}$  = 18 Hz), 129.8, 129.3, 128.5 (d,  $J_{C-P}$  = 12 Hz), 123.9, 119.4, 118.3, 117.5 (d,  $J_{C-P}$  = 105.0 Hz); <sup>31</sup>P NMR (CDCl<sub>3</sub>, 162 MHz): 24.7; ESI-HRMS (ESI, m/z): Calcd for C<sub>26</sub>H<sub>22</sub>O<sub>2</sub>P, [M + H]<sup>+</sup>: 397.1352, found 397.1349.

**(E)-4-(2-(Diphenylphosphoryl)vinyl)phenyl acetate (3f)**

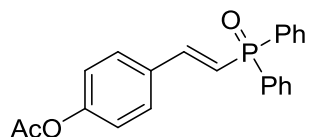



White solid; (55 mg, 75%); mp: 176–180 °C;  $R_f$  = 0.50 (hexanes/ethyl acetate 1:2);  $^1\text{H}$  NMR (400 MHz,  $\text{CDCl}_3$ ):  $\delta$  7.77–7.72 (m, 4H), 7.56–7.44 (m, 9H), 7.12 (d,  $J$  = 8.4 Hz, 2H), 6.79 (dd,  $J$  = 17.2 Hz,  $J$  = 22.4 Hz, 1H), 2.30 (s, 3H);  $^{13}\text{C}$  NMR (100 MHz,  $\text{CDCl}_3$ ):  $\delta$  169.1, 151.9, 146.3 (d,  $J_{\text{C-P}}$  = 4.0 Hz), 132.8 (d,  $J_{\text{C-P}}$  = 18 Hz), 132.76 (d,  $J_{\text{C-P}}$  = 105.0 Hz), 131.9 (d,  $J_{\text{C-P}}$  = 3.0 Hz), 131.3 (d,  $J_{\text{C-P}}$  = 10 Hz), 128.8, 128.6 (d,  $J_{\text{C-P}}$  = 11.0 Hz), 122.0, 119.4 (d,  $J_{\text{C-P}}$  = 104.0 Hz), 21.1;  $^{31}\text{P}$  NMR ( $\text{CDCl}_3$ , 162 MHz): 24.4; ESI-HRMS (ESI,  $m/z$ ): Calcd for  $\text{C}_{22}\text{H}_{19}\text{NaO}_3\text{P}$ ,  $[\text{M} + \text{Na}]^+$ : 385.0964, found 385.0968.

**(E)-(4-(Dimethylamino)styryl)diphenylphosphine oxide (3g)**

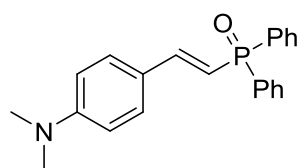

Purple solid; (42 mg, 61%); mp: 184–188 °C;  $R_f$  = 0.43 (hexanes/ethyl acetate 1:2);  $^1\text{H}$  NMR (400 MHz,  $\text{CDCl}_3$ ):  $\delta$  7.78–7.73 (m, 4H), 7.53–7.49 (m, 2H), 7.48–7.43 (m, 4H), 7.42–7.30 (m, 3H), 6.66 (d,  $J$  = 9.2 Hz, 2H), 6.52 (dd,  $J$  = 17.6 Hz,  $J$  = 22.4 Hz, 1H), 3.00 (s, 6H);  $^{13}\text{C}$  NMR (100 MHz,  $\text{CDCl}_3$ ):  $\delta$  151.4, 147.7 (d,  $J_{\text{C-P}}$  = 4.0 Hz), 133.4 (d,  $J_{\text{C-P}}$  = 104.0 Hz), 131.4 (d,  $J_{\text{C-P}}$  = 2.0 Hz), 131.2 (d,  $J_{\text{C-P}}$  = 10.0 Hz), 129.1, 128.3 (d,  $J_{\text{C-P}}$  = 12.0 Hz), 122.9 (d,  $J_{\text{C-P}}$  = 19.0 Hz), 112.0 (d,  $J_{\text{C-P}}$  = 109.0 Hz), 111.6, 40.0;  $^{31}\text{P}$  NMR ( $\text{CDCl}_3$ , 162 MHz): 26.0; ESI-HRMS (ESI,  $m/z$ ): Calcd for  $\text{C}_{22}\text{H}_{23}\text{NOP}$ ,  $[\text{M} + \text{H}]^+$ : 348.1512, found 348.1513.

**(E)-(2-([1,1'-Biphenyl]-4-yl)vinyl)diphenylphosphine oxide (3h)**

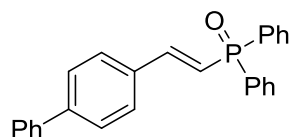

White solid; (48 mg, 63%); mp: 205–209 °C;  $R_f$  = 0.50 (hexanes/ethyl acetate 1:2);  $^1\text{H}$  NMR (400 MHz,  $\text{CDCl}_3$ ):  $\delta$  7.80–7.75 (m, 4H), 7.64–7.59 (m, 6H), 7.57–7.43 (m, 9H), 7.37 (t,  $J$  = 7.2 Hz, 1H), 6.87 (dd,  $J$  = 17.6 Hz,  $J$  = 22.4 Hz, 1H);  $^{13}\text{C}$  NMR (100 MHz,  $\text{CDCl}_3$ ):  $\delta$  146.9 (d,  $J_{\text{C-P}}$  = 3.0 Hz), 142.7, 140.0, 133.9 (d,  $J_{\text{C-P}}$  = 18.0 Hz), 132.7 (d,  $J_{\text{C-P}}$  = 105.0 Hz), 131.8 (d,  $J_{\text{C-P}}$  = 3.0 Hz), 131.2 (d,  $J_{\text{C-P}}$  = 10.0 Hz), 128.7, 128.5 (d,  $J_{\text{C-P}}$  = 12.0 Hz), 128.1, 127.6, 127.3, 126.9, 118.8 (d,  $J_{\text{C-P}}$  = 104.0 Hz);  $^{31}\text{P}$  NMR ( $\text{CDCl}_3$ , 162 MHz): 24.7; ESI-HRMS (ESI,  $m/z$ ): Calcd for  $\text{C}_{26}\text{H}_{22}\text{OP}$ ,  $[\text{M} + \text{H}]^+$ : 381.1403, found 381.1402.

**(E)-(4-Nitrostyryl)diphenylphosphine oxide (3i)**

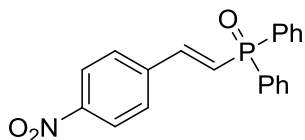

Yellow solid; (33 mg, 47%); mp: 212–215 °C;  $R_f$  = 0.46 (hexanes/ethyl acetate 1:2);  $^1\text{H}$  NMR (400 MHz,  $\text{CDCl}_3$ ):  $\delta$  8.24 (d,  $J$  = 7.6 Hz, 2H), 7.78–7.67 (m, 4H), 7.61–7.51 (m, 9H), 7.09–6.99 (m, 1H);  $^{13}\text{C}$  NMR (100 MHz,  $\text{CDCl}_3$ ):  $\delta$  148.4, 144.6 (d,  $J_{\text{C-P}}$  = 4.0 Hz), 141.0 (d,  $J_{\text{C-P}}$  = 19.0 Hz), 132.2 (d,  $J_{\text{C-P}}$  = 3.0 Hz), 132.1 (d,  $J_{\text{C-P}}$  = 106.0 Hz), 131.3 (d,  $J_{\text{C-P}}$  = 10.0 Hz), 128.8 (d,  $J_{\text{C-P}}$  = 12.0 Hz), 128.4, 124.7 (d,  $J_{\text{C-P}}$  = 100.0 Hz), 124.1;  $^{31}\text{P}$  NMR ( $\text{CDCl}_3$ , 162 MHz): 23.5; ESI-HRMS (ESI,  $m/z$ ): Calcd for  $\text{C}_{20}\text{H}_{17}\text{NO}_3\text{P}$ ,  $[\text{M} + \text{H}]^+$ : 350.0941, found 350.0946.

***Methyl (E)-4-(2-(diphenylphosphoryl)vinyl)benzoate (3j)***

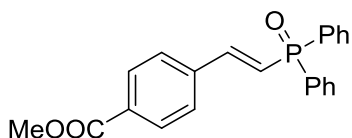

White solid; (56 mg, 77%); mp: 182–184 °C;  $R_f$  = 0.41 (hexanes/ethyl acetate 1:2);  $^1\text{H}$  NMR (400 MHz,  $\text{CDCl}_3$ ):  $\delta$  8.04 (d,  $J$  = 8.4 Hz, 2H), 7.79–7.74 (m, 4H), 7.60–7.47 (m, 9H), 6.97 (dd,  $J$  = 17.2 Hz,  $J$  = 22.0 Hz, 1H), 3.92 (s, 3H);  $^{13}\text{C}$  NMR (100 MHz,  $\text{CDCl}_3$ ):  $\delta$  166.3, 146.0 (d,  $J_{\text{C-P}}$  = 3.0 Hz), 139.0 (d,  $J_{\text{C-P}}$  = 18.0 Hz), 132.4 (d,  $J_{\text{C-P}}$  = 106.0 Hz), 131.9 (d,  $J_{\text{C-P}}$  = 3.0 Hz), 131.2 (d,  $J_{\text{C-P}}$  = 10.0 Hz), 131.1, 130.0, 128.6 (d,  $J_{\text{C-P}}$  = 12.0 Hz), 127.5, 122.1 (d,  $J_{\text{C-P}}$  = 102.0 Hz), 52.1;  $^{31}\text{P}$  NMR ( $\text{CDCl}_3$ , 162 MHz): 24.0; ESI-HRMS (ESI,  $m/z$ ): Calcd for  $\text{C}_{22}\text{H}_{20}\text{O}_3\text{P}$ ,  $[\text{M} + \text{H}]^+$ : 363.1145, found 363.1146.

***(E)-(4-Fluorostyryl)diphenylphosphine oxide (3k)***

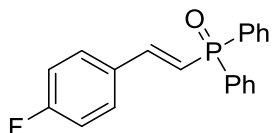

White solid; (39 mg, 61%); mp: 163–167 °C;  $R_f$  = 0.42 (hexanes/ethyl acetate 1:2);  $^1\text{H}$  NMR (400 MHz,  $\text{CDCl}_3$ ):  $\delta$  7.75 (dd,  $J$  = 7.6 Hz,  $J$  = 12 Hz, 4H), 7.56–7.43 (m, 9H), 7.06 (t,  $J$  = 8.4 Hz, 2H), 6.77 (dd,  $J$  = 17.6 Hz,  $J$  = 22.0 Hz, 1H);  $^{13}\text{C}$  NMR (100 MHz,  $\text{CDCl}_3$ ):  $\delta$  163.2 (d,  $J_{\text{C-F}}$  = 249.0 Hz), 145.7 (d,  $J_{\text{C-P}}$  = 3.0 Hz), 132.3 (d,  $J_{\text{C-P}}$  = 105.0 Hz), 131.5 (d,  $J_{\text{C-P}}$  = 3.0 Hz), 131.0 (d,  $J_{\text{C-F}}$  = 3.0 Hz), 130.9 (d,  $J_{\text{C-P}}$  = 10 Hz), 129.2 (d,  $J_{\text{C-F}}$  = 8.0 Hz), 128.2 (d,  $J_{\text{C-P}}$  = 12 Hz), 118.4 (dd,  $J_{\text{C-P}}$  = 104.0 Hz,  $J_{\text{C-F}}$  = 2 Hz), 115.5 (d,  $J_{\text{C-F}}$  = 21.0 Hz);  $^{31}\text{P}$  NMR ( $\text{CDCl}_3$ , 162 MHz):

24.4; ESI-HRMS (ESI, m/z): Calcd for C<sub>20</sub>H<sub>17</sub>FOP, [M + H]<sup>+</sup>: 323.0996, found 323.1003.

**(E)-(4-Chlorostyryl)diphenylphosphine oxide (3l)**

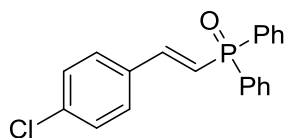

White solid; (49 mg, 72%); mp: 185–189 °C; R<sub>f</sub> = 0.44 (hexanes/ethyl acetate 1:2); <sup>1</sup>H NMR (400 MHz, CDCl<sub>3</sub>): δ 7.77–7.72 (m, 4H), 7.57–7.42 (m, 9H), 7.35 (d, J = 8.4 Hz, 2H), 6.82 (dd, J = 17.2 Hz, J = 22.0 Hz, 1H); <sup>13</sup>C NMR (100 MHz, CDCl<sub>3</sub>): δ 146.0 (d, J<sub>C-P</sub> = 3.0 Hz), 136.0, 133.6 (d, J<sub>C-P</sub> = 18.0 Hz), 132.7 (d, J<sub>C-P</sub> = 106.0 Hz), 131.9 (d, J<sub>C-P</sub> = 3.0 Hz), 131.3 (d, J<sub>C-P</sub> = 10.0 Hz), 129.1, 128.9, 128.6 (d, J<sub>C-P</sub> = 12.0 Hz), 120.0 (d, J<sub>C-P</sub> = 103.0 Hz); <sup>31</sup>P NMR (CDCl<sub>3</sub>, 162 MHz): 24.2; ESI-HRMS (ESI, m/z): Calcd for C<sub>20</sub>H<sub>17</sub>ClOP, [M + H]<sup>+</sup>: 339.0700, found 339.0702.

**(E)-(4-Bromostyryl)diphenylphosphine oxide (3m)**

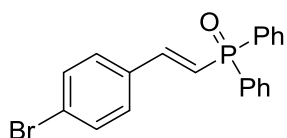

White solid; (49 mg, 64%); mp: 195–199 °C; R<sub>f</sub> = 0.27 (hexanes/ethyl acetate 1:1); <sup>1</sup>H NMR (400 MHz, CDCl<sub>3</sub>): δ 7.77–7.72 (m, 4H), 7.57–7.38 (m, 11H), 6.83 (dd, J = 17.6 Hz, J = 22.0 Hz, 1H); <sup>13</sup>C NMR (100 MHz, CDCl<sub>3</sub>): δ 146.2 (d, J<sub>C-P</sub> = 4.0 Hz), 134.0 (d, J<sub>C-P</sub> = 18.0 Hz), 132.7 (d, J<sub>C-P</sub> = 105.0 Hz), 132.1, 132.0 (d, J<sub>C-P</sub> = 3.0 Hz), 131.4 (d, J<sub>C-P</sub> = 9.0 Hz), 129.2, 128.7 (d, J<sub>C-P</sub> = 12.0 Hz), 124.3, 120.1 (d, J<sub>C-P</sub> = 103.0 Hz); <sup>31</sup>P NMR (CDCl<sub>3</sub>, 162 MHz): 24.2; ESI-HRMS (ESI, m/z): Calcd for C<sub>20</sub>H<sub>17</sub>BrOP, [M + H]<sup>+</sup>: 383.0195, found 383.0190.

**(E)-(3-Chlorostyryl)diphenylphosphine oxide (3n)**

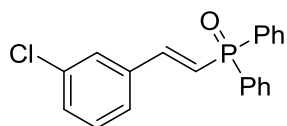

White solid; (37 mg, 54%); mp: 173–176 °C; R<sub>f</sub> = 0.41 (hexanes/ethyl acetate 1:2); <sup>1</sup>H NMR (400 MHz, CDCl<sub>3</sub>): δ 7.77–7.72 (m, 4H), 7.57–7.53 (m, 2H), 7.51–7.42 (m, 6H), 7.40–7.29 (m, 3H), 6.86 (dd, J = 17.2 Hz, J = 22.0 Hz, 1H); <sup>13</sup>C NMR (100 MHz, CDCl<sub>3</sub>): δ 145.8 (d, J<sub>C-P</sub> = 4.0 Hz), 136.8 (d, J<sub>C-P</sub> = 17.0 Hz), 134.8, 132.5 (d, J<sub>C-P</sub> = 106.0 Hz), 132.0 (d, J<sub>C-P</sub> = 3.0 Hz), 131.3 (d, J<sub>C-P</sub> = 10.0 Hz), 130.1, 129.9, 128.6 (d, J<sub>C-P</sub> = 12.0 Hz), 127.2, 126.2,

121.0 (d,  $J_{C-P} = 102.0$  Hz);  $^{31}\text{P}$  NMR ( $\text{CDCl}_3$ , 162 MHz): 24.4; ESI-HRMS (ESI,  $m/z$ ): Calcd for  $\text{C}_{20}\text{H}_{17}\text{ClOP}$ ,  $[\text{M} + \text{H}]^+$ : 339.0700, found 339.0704.

**(E)-(2-Chlorostyryl)diphenylphosphine oxide (3o)**

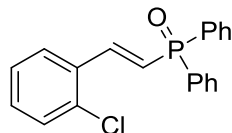

White solid; (32 mg, 47%); mp: 175–178 °C;  $R_f = 0.41$  (hexanes/ethyl acetate 1:2);  $^1\text{H}$  NMR (400 MHz,  $\text{CDCl}_3$ ):  $\delta$  7.83–7.74 (m, 5H), 7.65–7.62 (m, 1H), 7.57–7.53 (m, 2H), 7.51–7.47 (m, 4H), 7.41–7.36 (m, 1H), 7.31–7.25 (m, 2H), 6.88 (dd,  $J = 17.2$  Hz,  $J = 20.4$  Hz, 1H);  $^{13}\text{C}$  NMR (100 MHz,  $\text{CDCl}_3$ ):  $\delta$  143.5 (d,  $J_{C-P} = 5.0$  Hz), 134.4, 133.4 (d,  $J_{C-P} = 18.0$  Hz), 132.4 (d,  $J_{C-P} = 105.0$  Hz), 131.9 (d,  $J_{C-P} = 2.0$  Hz), 131.4 (d,  $J_{C-P} = 10.0$  Hz), 130.7, 130.0, 128.5 (d,  $J_{C-P} = 12.0$  Hz), 127.6 (d,  $J_{C-P} = 1.0$  Hz), 127.0, 123.0 (,  $J_{C-P} = 103.0$  Hz);  $^{31}\text{P}$  NMR ( $\text{CDCl}_3$ , 162 MHz): 24.7; ESI-HRMS (ESI,  $m/z$ ): Calcd for  $\text{C}_{20}\text{H}_{17}\text{ClOP}$ ,  $[\text{M} + \text{H}]^+$ : 339.0700, found 339.0703.

**(E)-(3-Bromostyryl)diphenylphosphine oxide (3p)**

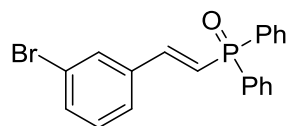

Yellow solid; (38 mg, 50%); mp: 145–148 °C;  $R_f = 0.49$  (hexanes/ethyl acetate 1:2);  $^1\text{H}$  NMR (400 MHz,  $\text{CDCl}_3$ ):  $\delta$  7.77–7.72 (m, 4H), 7.67 (s, 1H), 7.55–7.42 (m, 9H), 7.25 (t,  $J = 7.2$  Hz, 1H); 6.85 (t,  $J = 26.4$  Hz, 1H);  $^{13}\text{C}$  NMR (100 MHz,  $\text{CDCl}_3$ ):  $\delta$  144.3 (d,  $J_{C-P} = 4.0$  Hz), 135.6 (d,  $J_{C-P} = 18.0$  Hz), 131.4, 130.9 (d,  $J_{C-P} = 106.0$  Hz), 130.6 (d,  $J_{C-P} = 3.0$  Hz), 129.8 (d,  $J_{C-P} = 10$  Hz), 128.9, 128.7, 127.2 (d,  $J_{C-P} = 12.0$  Hz), 125.2, 121.5, 119.5 (d,  $J_{C-P} = 103.0$  Hz);  $^{31}\text{P}$  NMR ( $\text{CDCl}_3$ , 162 MHz): 24.3; ESI-HRMS (ESI,  $m/z$ ): Calcd for  $\text{C}_{20}\text{H}_{17}\text{BrOP}$ ,  $[\text{M} + \text{H}]^+$ : 383.0195, found 383.0197.

**(E)-(2-Bromostyryl)diphenylphosphine oxide (3q)**

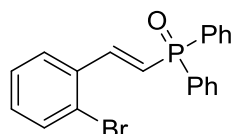

White solid; (30 mg, 39%); mp: 158–161 °C;  $R_f = 0.45$  (hexanes/ethyl acetate 1:2);  $^1\text{H}$  NMR (400 MHz,  $\text{CDCl}_3$ ):  $\delta$  7.78 (dd,  $J = 7.6$  Hz,  $J = 12.0$  Hz, 4H), 7.74–7.64 (m, 1H), 7.61 (d,

$J = 8.0$  Hz, 1H), 7.58–7.53 (m, 3H), 7.51–7.48 (m, 4H), 7.31 (t,  $J = 7.6$  Hz, 1H), 7.20 (t,  $J = 7.6$  Hz, 1H), 6.82 (dd,  $J = 17.6$  Hz,  $J = 20.0$  Hz, 1H);  $^{13}\text{C}$  NMR (100 MHz,  $\text{CDCl}_3$ ):  $\delta$  146.9 (d,  $J_{\text{C-P}} = 3.0$  Hz), 134.8 (d,  $J_{\text{C-P}} = 18.0$  Hz), 133.0, 131.9 (d,  $J_{\text{C-P}} = 105.0$  Hz), 131.6 (d,  $J_{\text{C-P}} = 2.0$  Hz), 131.2 (d,  $J_{\text{C-P}} = 10.0$  Hz), 130.6, 128.3 (d,  $J_{\text{C-P}} = 12.0$  Hz), 127.4, 127.3, 124.4, 122.8 (d,  $J_{\text{C-P}} = 102.0$  Hz);  $^{31}\text{P}$  NMR ( $\text{CDCl}_3$ , 162 MHz): 25.0; ESI-HRMS (ESI,  $m/z$ ): Calcd for  $\text{C}_{20}\text{H}_{17}\text{BrOP}$ ,  $[\text{M} + \text{H}]^+$ : 383.0195, found 383.0196.

**(E)-(3-Methylstyryl)diphenylphosphine oxide (3r)**

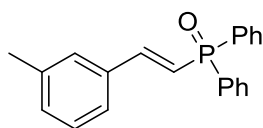

White solid; (36 mg, 57%); mp: 130–134 °C;  $R_f = 0.44$  (hexanes/ethyl acetate 1:2);  $^1\text{H}$  NMR (400 MHz,  $\text{CDCl}_3$ ):  $\delta$  7.75 (dd,  $J = 7.6$  Hz,  $J = 12$  Hz, 4H), 7.56–7.42(m, 7H), 7.33 (d,  $J = 7.2$  Hz, 2H), 7.27 (t,  $J = 7.2$  Hz, 1H), 7.18 (d,  $J = 7.2$  Hz, 1H), 6.82 (dd,  $J = 17.2$  Hz,  $J = 22.4$  Hz, 1H), 2.36 (s, 3H);  $^{13}\text{C}$  NMR (100 MHz,  $\text{CDCl}_3$ ):  $\delta$  147.1 (d,  $J_{\text{C-P}} = 4.0$  Hz), 137.8, 134.4 (d,  $J_{\text{C-P}} = 18.0$  Hz), 132.3 (d,  $J_{\text{C-P}} = 105.0$  Hz), 131.2 (d,  $J_{\text{C-P}} = 3.0$  Hz), 130.7 (d,  $J_{\text{C-P}} = 9.0$  Hz), 130.3, 128.1, 128.0 (d,  $J_{\text{C-P}} = 12.0$  Hz), 127.6, 124.4, 118.2 (d,  $J_{\text{C-P}} = 104.0$  Hz), 20.7;  $^{31}\text{P}$  NMR ( $\text{CDCl}_3$ , 162 MHz): 24.8; ESI-HRMS (ESI,  $m/z$ ): Calcd for  $\text{C}_{21}\text{H}_{20}\text{OP}$ ,  $[\text{M} + \text{H}]^+$ : 319.1246, found 319.1243.

**(E)-(2-Methylstyryl)diphenylphosphine oxide (3s)**

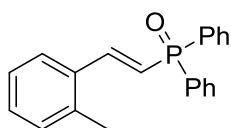

White solid; (31 mg, 49%); mp: 137–141 °C;  $R_f = 0.51$  (hexanes/ethyl acetate 1:2);  $^1\text{H}$  NMR (400 MHz,  $\text{CDCl}_3$ ):  $\delta$  7.79–7.72 (m, 5H), 7.57–7.48 (m, 7H), 7.26–7.20 (m, 3H), 6.78 (dd,  $J = 17.6$  Hz,  $J = 22.8$  Hz, 1H), 2.37 (s, 3H);  $^{13}\text{C}$  NMR (100 MHz,  $\text{CDCl}_3$ ):  $\delta$  141.6 (d,  $J_{\text{C-P}} = 3.0$  Hz), 133.3, 130.2 (d,  $J_{\text{C-P}} = 18.0$  Hz), 128.9 (d,  $J_{\text{C-P}} = 105.0$  Hz), 128.2 (d,  $J_{\text{C-P}} = 2.0$  Hz), 127.5 (d,  $J_{\text{C-P}} = 10.0$  Hz), 127.0, 126.1, 124.9 (d,  $J_{\text{C-P}} = 12.0$  Hz), 122.5, 122.4, 116.4 (d,  $J_{\text{C-P}} = 103.0$  Hz), 15.9;  $^{31}\text{P}$  NMR ( $\text{CDCl}_3$ , 162 MHz): 24.8; ESI-HRMS (ESI,  $m/z$ ): Calcd for  $\text{C}_{21}\text{H}_{20}\text{OP}$ ,  $[\text{M} + \text{H}]^+$ : 319.1246, found 319.1248.

**(E)-(3,4-Dimethylstyryl)diphenylphosphine oxide (3t)**

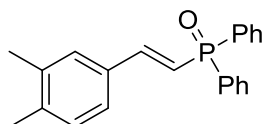

White solid; (41 mg, 62%); mp: 197–201 °C;  $R_f$  = 0.50 (hexanes/ethyl acetate 1:2);  $^1\text{H}$  NMR (400 MHz,  $\text{CDCl}_3$ ):  $\delta$  7.78–7.73 (m, 4H), 7.54–7.50 (m, 2H), 7.48–7.39 (m, 5H), 7.29–7.25 (m, 2H), 7.13 (d,  $J$  = 7.6 Hz, 1H), 7.71 (dd,  $J$  = 17.6 Hz,  $J$  = 22.4 Hz, 1H), 2.26 (s, 6H);  $^{13}\text{C}$  NMR (100 MHz,  $\text{CDCl}_3$ ):  $\delta$  147.6 (d,  $J_{\text{C-P}}$  = 4.0 Hz), 139.1, 137.0, 133.0 (d,  $J_{\text{C-P}}$  = 105.0 Hz), 132.7 (d,  $J_{\text{C-P}}$  = 18 Hz), 131.7 (d,  $J_{\text{C-P}}$  = 3.0 Hz), 131.3 (d,  $J_{\text{C-P}}$  = 10.0 Hz), 130.0, 128.7, 128.4 (d,  $J_{\text{C-P}}$  = 12.0 Hz), 125.3, 117.5 (d,  $J_{\text{C-P}}$  = 105.0 Hz), 19.64, 19.61;  $^{31}\text{P}$  NMR ( $\text{CDCl}_3$ , 162 MHz): 24.8; ESI-HRMS (ESI,  $m/z$ ): Calcd for  $\text{C}_{22}\text{H}_{22}\text{OP}$ ,  $[\text{M} + \text{H}]^+$ : 333.1403, found 333.1405.

***(E)*-(3,4-Dimethoxystyryl)diphenylphosphine oxide (3u)**

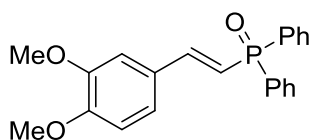

White solid; (46 mg, 63%); mp: 136–140 °C;  $R_f$  = 0.31 (hexanes/ethyl acetate 1:2);  $^1\text{H}$  NMR (400 MHz,  $\text{CDCl}_3$ ):  $\delta$  7.79–7.74 (m, 4H), 7.54–7.36 (m, 7H), 7.10–7.06 (m, 2H), 6.86 (d,  $J$  = 8.0 Hz, 1H), 6.66 (dd,  $J$  = 17.6 Hz,  $J$  = 21.6 Hz, 1H), 3.90 (s, 6H);  $^{13}\text{C}$  NMR (100 MHz,  $\text{CDCl}_3$ ):  $\delta$  150.9, 149.2, 147.4 (d,  $J_{\text{C-P}}$  = 4.0 Hz), 133.1 (d,  $J_{\text{C-P}}$  = 106.0 Hz), 131.8 (d,  $J_{\text{C-P}}$  = 3.0 Hz), 131.4 (d,  $J_{\text{C-P}}$  = 10.0 Hz), 128.6 (d,  $J_{\text{C-P}}$  = 12.0 Hz), 128.2 (d,  $J_{\text{C-P}}$  = 18.0 Hz), 122.0, 116.4 (d,  $J_{\text{C-P}}$  = 106.0 Hz), 111.0, 109.5, 55.94, 55.90;  $^{31}\text{P}$  NMR ( $\text{CDCl}_3$ , 162 MHz): 25.0; ESI-HRMS (ESI,  $m/z$ ): Calcd for  $\text{C}_{22}\text{H}_{21}\text{NaO}_3\text{P}$ ,  $[\text{M} + \text{Na}]^+$ : 387.1121, found 387.1123.

***(E)*-(2-(Naphthalen-1-yl)vinyl)diphenylphosphine oxide (3v)**

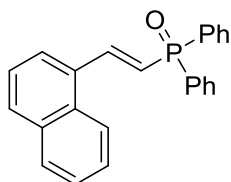

Red solid; (51 mg, 72%); mp: 141–143 °C;  $R_f$  = 0.56 (hexanes/ethyl acetate 1:2);  $^1\text{H}$  NMR (400 MHz,  $\text{CDCl}_3$ ):  $\delta$  8.33 (dd,  $J$  = 13.2 Hz,  $J$  = 19.6 Hz, 1H), 8.13–8.10 (m, 1H), 7.88–7.76 (m, 7H), 7.57–7.45 (m, 9H), 6.96 (dd,  $J$  = 17.2 Hz,  $J$  = 23.2 Hz, 1H);  $^{13}\text{C}$  NMR (100 MHz,  $\text{CDCl}_3$ ):  $\delta$  144.8 (d,  $J_{\text{C-P}}$  = 4.0 Hz), 133.5, 132.8 (d,  $J_{\text{C-P}}$  = 105.0 Hz), 132.7 (d,  $J_{\text{C-P}}$  = 17.0 Hz),

131.8 (d,  $J_{C-P}$  = 3.0 Hz), 131.3 (d,  $J_{C-P}$  = 10.0 Hz), 131.0, 130.2, 128.6 (d,  $J_{C-P}$  = 12.0 Hz), 126.7, 126.1, 125.2, 124.6 (d,  $J_{C-P}$  = 1.0 Hz), 123.2, 122.4 (d,  $J_{C-P}$  = 102.0 Hz);  $^{31}\text{P}$  NMR ( $\text{CDCl}_3$ , 162 MHz): 24.2; ESI-HRMS (ESI,  $m/z$ ): Calcd for  $\text{C}_{24}\text{H}_{20}\text{OP}$ ,  $[\text{M} + \text{H}]^+$ : 355.1246, found 355.1240.

***(E)-Diphenyl(2-(pyridin-2-yl)vinyl)phosphine oxide (3w)***

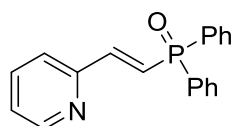

Yellow solid; (30 mg, 49%); mp: 134–138 °C;  $R_f$  = 0.21 (hexanes/ethyl acetate 1:2);  $^1\text{H}$  NMR (400 MHz,  $\text{CDCl}_3$ ):  $\delta$  8.63 (d,  $J$  = 4.4 Hz, 1H), 7.80–7.75 (m, 4H), 7.71 (dt,  $J$  = 1.6 Hz,  $J$  = 8.0 Hz, 1H), 7.62–7.59 (m, 1H), 7.57–7.50 (m, 3H), 7.48–7.44 (m, 4H), 7.38 (d,  $J$  = 7.6 Hz, 1H), 7.25 (dd,  $J$  = 4.8 Hz,  $J$  = 7.2 Hz, 1H);  $^{13}\text{C}$  NMR (100 MHz,  $\text{CDCl}_3$ ):  $\delta$  152.6 (d,  $J_{C-P}$  = 18.0 Hz), 149.8, 145.8 (d,  $J_{C-P}$  = 4.0 Hz), 136.9, 132.5 (d,  $J_{C-P}$  = 105.0 Hz), 131.7 (d,  $J_{C-P}$  = 3.0 Hz), 131.1 (d,  $J_{C-P}$  = 11.0 Hz), 128.5 (d,  $J_{C-P}$  = 12.0 Hz), 124.4, 124.1, 123.8 (d,  $J_{C-P}$  = 101.0 Hz);  $^{31}\text{P}$  NMR ( $\text{CDCl}_3$ , 162 MHz): 24.1; ESI-HRMS (ESI,  $m/z$ ): Calcd for  $\text{C}_{19}\text{H}_{19}\text{NOP}$ ,  $[\text{M} + \text{H}]^+$ : 308.1199, found 308.1202.

***(E)-Diphenyl(2-(thiophen-2-yl)vinyl)phosphine oxide (3x)***

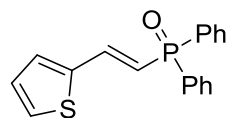

White solid; (36 mg, 58%); mp: 144–145 °C;  $R_f$  = 0.52 (hexanes/ethyl acetate 1:2);  $^1\text{H}$  NMR (400 MHz,  $\text{CDCl}_3$ ):  $\delta$  7.77–7.72 (m, 4H), 7.63–7.52 (m, 3H), 7.50–7.46 (m, 4H), 7.36 (d,  $J$  = 4.8 Hz, 1H), 7.20 (d,  $J$  = 3.6 Hz, 1H), 7.03 (dd,  $J$  = 3.6 Hz,  $J$  = 4.8 Hz, 1H), 6.58 (dd,  $J$  = 17.2 Hz,  $J$  = 21.6 Hz, 1H);  $^{13}\text{C}$  NMR (100 MHz,  $\text{CDCl}_3$ ):  $\delta$  140.8, 140.5, 139.8 (d,  $J_{C-P}$  = 4.0 Hz), 132.7 (d,  $J_{C-P}$  = 106.0 Hz), 131.8 (d,  $J_{C-P}$  = 3.0 Hz), 131.2 (d,  $J_{C-P}$  = 10.0 Hz), 130.0, 128.5 (d,  $J_{C-P}$  = 12.0 Hz), 127.9 (d,  $J_{C-P}$  = 3.0 Hz), 117.5 (d,  $J_{C-P}$  = 105.0 Hz);  $^{31}\text{P}$  NMR ( $\text{CDCl}_3$ , 162 MHz): 24.2; ESI-HRMS (ESI,  $m/z$ ): Calcd for  $\text{C}_{18}\text{H}_{16}\text{OPS}$ ,  $[\text{M} + \text{H}]^+$ : 311.0654, found 311.0655.

***(E)-Diphenyl(2-phenylprop-1-en-1-yl)phosphine oxide (3y)***

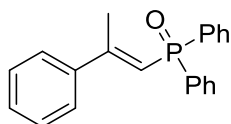

White oil; (32 mg, 51%);  $R_f = 0.29$  (hexanes/ethyl acetate 1:1);  $^1\text{H NMR}$  (400 MHz,  $\text{CDCl}_3$ ):  $\delta$  7.80 (dd,  $J = 3.6$  Hz,  $J = 7.6$  Hz, 4H), 7.50–7.44 (m, 8H), 7.37–7.35 (m, 3H), 6.40 (d,  $J = 23.6$  Hz, 1H), 2.50 (d,  $J = 2.4$  Hz, 3H);  $^{13}\text{C NMR}$  (100 MHz,  $\text{CDCl}_3$ ):  $\delta$  158.6 (d,  $J_{\text{C-P}} = 3.0$  Hz), 141.4 (d,  $J_{\text{C-P}} = 17.0$  Hz), 133.9 (d,  $J_{\text{C-P}} = 104.0$  Hz), 130.8 (d,  $J_{\text{C-P}} = 2.0$  Hz), 130.2 (d,  $J_{\text{C-P}} = 10.0$  Hz), 128.5, 128.0 (d,  $J_{\text{C-P}} = 12.0$  Hz), 127.8, 125.2, 117.6 (d,  $J_{\text{C-P}} = 104.0$  Hz), 19.0 (d,  $J_{\text{C-P}} = 7.0$  Hz);  $^{31}\text{P NMR}$  ( $\text{CDCl}_3$ , 162 MHz): 21.8; ESI-HRMS (ESI,  $m/z$ ): Calcd for  $\text{C}_{21}\text{H}_{20}\text{OP}$ ,  $[\text{M} + \text{H}]^+$ : 319.1246, found 319.1248.

**(1H-Inden-2-yl)diphenylphosphine oxide (3z)**

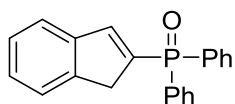

Yellow oil; (30 mg, 47%);  $R_f = 0.48$  (hexanes/ethyl acetate 1:2);  $^1\text{H NMR}$  (400 MHz,  $\text{CDCl}_3$ ):  $\delta$  7.78–7.73 (m, 4H), 7.56 (dt,  $J = 1.6$  Hz,  $J = 7.2$  Hz, 2H), 7.51–7.45 (m, 6H), 7.34–7.26 (m, 3H), 3.70 (s, 2H);  $^{13}\text{C NMR}$  (100 MHz,  $\text{CDCl}_3$ ):  $\delta$  146.0 (d,  $J_{\text{C-P}} = 9.0$  Hz), 145.8 (d,  $J_{\text{C-P}} = 11.0$  Hz), 142.7 (d,  $J_{\text{C-P}} = 16.0$  Hz), 139.1 (d,  $J_{\text{C-P}} = 109.0$  Hz), 132.2 (d,  $J_{\text{C-P}} = 105.0$  Hz), 132.0 (d,  $J_{\text{C-P}} = 3.0$  Hz), 131.6 (d,  $J_{\text{C-P}} = 10.0$  Hz), 128.6 (d,  $J_{\text{C-P}} = 12.0$  Hz), 127.2, 126.9, 124.2 (d,  $J_{\text{C-P}} = 1.0$  Hz), 122.8, 40.3 (d,  $J_{\text{C-P}} = 12.0$  Hz);  $^{31}\text{P NMR}$  ( $\text{CDCl}_3$ , 162 MHz): 24.0; ESI-HRMS (ESI,  $m/z$ ): Calcd for  $\text{C}_{21}\text{H}_{18}\text{OP}$ ,  $[\text{M} + \text{H}]^+$ : 317.1090, found 317.1089.

**(8R,9S,13S,14S)-3-((E)-2-(Diphenylphosphoryl)vinyl)-13-methyl-6,7,8,9,11,12,13,14,15,16-decahydro-17H-cyclopenta[a]phenanthren-17-one (3ac)**

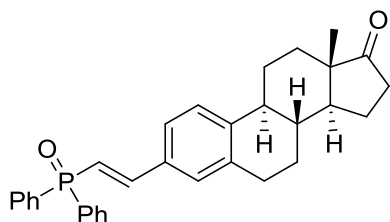

Yellow oil; (59 mg, 61%);  $R_f = 0.46$  (hexanes/ethyl acetate 1:2);  $^1\text{H NMR}$  (400 MHz,  $\text{CDCl}_3$ ):  $\delta$  7.75 (dd,  $J = 7.2$  Hz,  $J = 12$  Hz, 4H), 7.55–7.51 (m, 2H), 7.49–7.40 (m, 5H), 7.34–7.29 (m, 2H), 7.26 (s, 1H), 6.79 (dd,  $J = 17.2$  Hz,  $J = 22.4$  Hz, 1H), 2.92 (t,  $J = 4.4$  Hz, 2H), 2.50 (dd,  $J = 8.8$  Hz,  $J = 18.8$  Hz, 1H), 2.45–2.40 (m, 1H), 2.37–2.28 (m, 1H), 2.15 (dd,  $J = 8.8$  Hz,  $J =$



18.8 Hz, 1H), 2.10–1.96 (m, 3H), 1.68–1.59 (m, 2H), 1.56–1.40 (m, 4H), 0.90 (s, 3H); <sup>13</sup>C NMR (100 MHz, CDCl<sub>3</sub>): δ 220.5, 147.3 (d, *J*<sub>C-P</sub> = 3.0 Hz), 142.2, 137.0, 133.0 (d, *J*<sub>C-P</sub> = 105.0 Hz), 132.6 (d, *J*<sub>C-P</sub> = 18.0 Hz), 131.7 (d, *J*<sub>C-P</sub> = 2.0 Hz), 131.3 (d, *J*<sub>C-P</sub> = 9.0 Hz), 128.5 (d, *J*<sub>C-P</sub> = 12.0 Hz), 128.3, 125.8, 125.0, 118.2 (d, *J*<sub>C-P</sub> = 104.0 Hz), 50.4, 47.8, 44.5, 37.9, 35.7, 31.4, 29.2, 26.2, 25.5, 21.5, 13.7; <sup>31</sup>P NMR (CDCl<sub>3</sub>, 162 MHz): 24.6; ESI-HRMS (ESI, *m/z*): Calcd for C<sub>32</sub>H<sub>34</sub>O<sub>2</sub>P, [M + H]<sup>+</sup>: 481.2291, found 481.2293.

**(E)-4-(2-(Diphenylphosphoryl)vinyl)benzyl 2-acetoxybenzoate (3ad)**

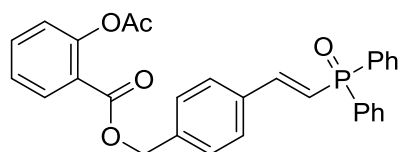

White solid; (52 mg, 52%); mp: 129–132 °C; *R*<sub>f</sub> = 0.41 (hexanes/ethyl acetate 1:2); <sup>1</sup>H NMR (400 MHz, CDCl<sub>3</sub>): δ 8.05 (dd, *J* = 1.6 Hz, *J* = 7.6 Hz, 1H), 7.78–7.73 (m, 4H), 7.58–7.46 (m, 10H), 7.43 (d, *J* = 8.0 Hz, 2H), 7.33–7.29 (m, 1H), 7.10 (d, *J* = 8.0 Hz, 1H), 6.87 (dd, *J* = 17.6 Hz, *J* = 21.6 Hz, 1H), 5.31 (s, 2H), 2.17 (s, 3H); <sup>13</sup>C NMR (100 MHz, CDCl<sub>3</sub>): δ 169.6, 164.2, 150.7, 146.8 (d, *J*<sub>C-P</sub> = 3.0 Hz), 137.6, 135.2 (d, *J*<sub>C-P</sub> = 17.0 Hz), 134.0, 132.8 (d, *J*<sub>C-P</sub> = 105.0 Hz), 131.9 (d, *J*<sub>C-P</sub> = 3.0 Hz), 131.87, 131.3 (d, *J*<sub>C-P</sub> = 10.0 Hz), 128.7, 128.6 (d, *J*<sub>C-P</sub> = 12.0 Hz), 128.0, 126.0, 123.8, 123.0, 119.9 (d, *J*<sub>C-P</sub> = 103.0 Hz), 66.3, 20.8; <sup>31</sup>P NMR (CDCl<sub>3</sub>, 162 MHz): 24.3; ESI-HRMS (ESI, *m/z*): Calcd for C<sub>30</sub>H<sub>26</sub>O<sub>5</sub>P, [M + H]<sup>+</sup>: 497.1512, found 497.1508.

**(E)-4-(2-(Diphenylphosphoryl)vinyl)benzyl 2-(4-isobutylphenyl)propanoate (3ae)**

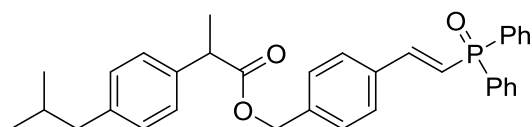

White solid; (66 mg, 63%); mp: 75–79 °C; *R*<sub>f</sub> = 0.37 (hexanes/ethyl acetate 1:2); <sup>1</sup>H NMR (400 MHz, CDCl<sub>3</sub>): δ 7.77–7.72 (m, 4H), 7.56–7.43 (m, 9H), 7.20 (t, *J* = 7.6 Hz, 4H), 7.08 (d, *J* = 8.0 Hz, 2H), 6.81 (dd, *J* = 17.6 Hz, *J* = 21.6 Hz, 1H), 5.10 (s, 2H), 3.74 (q, *J* = 7.2 Hz, 1H), 2.44 (d, *J* = 7.2 Hz, 2H), 1.89–1.79 (m, 1H), 1.50 (d, *J* = 7.2 Hz, 3H), 0.89 (d, *J* = 6.4 Hz, 6H); <sup>13</sup>C NMR (100 MHz, CDCl<sub>3</sub>): δ 174.3, 146.9 (d, *J*<sub>C-P</sub> = 3.0 Hz), 140.6, 138.1, 137.4, 134.7 (d, *J*<sub>C-P</sub> = 18.0 Hz), 132.8 (d, *J*<sub>C-P</sub> = 106.0 Hz), 131.8 (d, *J*<sub>C-P</sub> = 2.0 Hz), 131.3 (d, *J*<sub>C-P</sub> = 10.0 Hz), 129.3, 128.6 (d, *J*<sub>C-P</sub> = 12.0 Hz), 128.0, 127.8, 127.1, 119.5 (d, *J*<sub>C-P</sub> = 104.0 Hz), 65.6, 45.0,

44.9, 30.1, 22.3, 18.2;  $^{31}\text{P}$  NMR ( $\text{CDCl}_3$ , 162 MHz): 24.5; ESI-HRMS (ESI,  $m/z$ ): Calcd for  $\text{C}_{34}\text{H}_{36}\text{O}_3\text{P}$ ,  $[\text{M} + \text{H}]^+$ : 523.2397, found 523.2398.

**(E)-4-(2-(Diphenylphosphoryl)vinyl)benzyl 4-(N,N-dipropylsulfamoyl)benzoate (3af)**

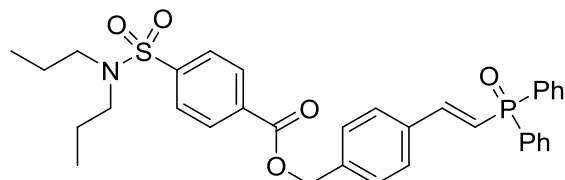

White oil; (93 mg, 77%);  $R_f = 0.27$  (hexanes/ethyl acetate 1:2);  $^1\text{H}$  NMR (400 MHz,  $\text{CDCl}_3$ ):  $\delta$  8.17 (d,  $J = 8.4$  Hz, 2H), 7.87 (d,  $J = 8.4$  Hz, 2H), 7.79–7.73 (m, 4H), 7.58–7.53 (m, 5H), 7.51–7.46 (m, 6H), 6.88 (dd,  $J = 17.6$  Hz,  $J = 22.4$  Hz, 1H), 5.39 (s, 2H), 3.09 (t,  $J = 7.6$  Hz, 4H), 1.59–1.49 (m, 4H), 0.86 (t,  $J = 7.2$  Hz, 6H);  $^{13}\text{C}$  NMR (100 MHz,  $\text{CDCl}_3$ ):  $\delta$  164.9, 146.6 (d,  $J_{\text{C-P}} = 4.0$  Hz), 144.4, 137.3, 135.2 (d,  $J_{\text{C-P}} = 18.0$  Hz), 133.1, 132.7 (d,  $J_{\text{C-P}} = 106.0$  Hz), 131.8 (d,  $J_{\text{C-P}} = 2.0$  Hz), 131.3 (d,  $J_{\text{C-P}} = 10.0$  Hz), 130.2, 128.6, 128.5 (d,  $J_{\text{C-P}} = 12.0$  Hz), 128.0, 126.9, 119.9 (d,  $J_{\text{C-P}} = 103.0$  Hz), 66.6, 49.8, 21.8, 11.0;  $^{31}\text{P}$  NMR ( $\text{CDCl}_3$ , 162 MHz): 24.3; ESI-HRMS (ESI,  $m/z$ ): Calcd for  $\text{C}_{34}\text{H}_{37}\text{NO}_5\text{PS}$ ,  $[\text{M} + \text{H}]^+$ : 602.2125, found 602.2128.

**(E)-4-(2-(Diphenylphosphoryl)vinyl)benzyl 3-(4,5-diphenyloxazol-2-yl)propanoate (3ag)**

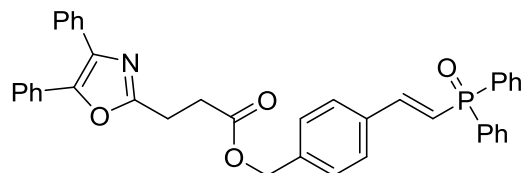

White oil; (68 mg, 56%);  $R_f = 0.20$  (hexanes/ethyl acetate 1:2);  $^1\text{H}$  NMR (400 MHz,  $\text{CDCl}_3$ ):  $\delta$  7.74 (dd,  $J = 7.6$  Hz,  $J = 11.6$  Hz, 4H), 7.60 (d,  $J = 7.2$  Hz, 2H), 7.56–7.39 (m, 11H), 7.33–7.25 (m, 8H), 6.77 (dd,  $J = 17.6$  Hz,  $J = 22.0$  Hz, 1H), 5.17 (s, 2H), 3.20 (t,  $J = 7.2$  Hz, 2H), 2.98 (t,  $J = 7.2$  Hz, 2H);  $^{13}\text{C}$  NMR (100 MHz,  $\text{CDCl}_3$ ):  $\delta$  171.1, 160.9, 146.3 (d,  $J_{\text{C-P}} = 4.0$  Hz), 144.8, 137.2, 134.4, 134.3 (d,  $J_{\text{C-P}} = 18.0$  Hz), 132.2 (d,  $J_{\text{C-P}} = 105.0$  Hz), 131.8, 131.3 (d,  $J_{\text{C-P}} = 2.0$  Hz), 130.7 (d,  $J_{\text{C-P}} = 10.0$  Hz), 128.2, 128.1 (d,  $J_{\text{C-P}} = 12.0$  Hz), 128.0, 127.9, 127.8, 127.7, 127.4, 127.3, 127.2, 125.8, 119.0 (d,  $J_{\text{C-P}} = 103.0$  Hz), 65.3, 30.4, 22.8;  $^{31}\text{P}$  NMR ( $\text{CDCl}_3$ , 162 MHz): 24.4; ESI-HRMS (ESI,  $m/z$ ): Calcd for  $\text{C}_{39}\text{H}_{33}\text{NO}_4\text{P}$ ,  $[\text{M} + \text{H}]^+$ : 610.2142, found 610.2145.

**(5-((4-Hydroxy-2,2,6,6-tetramethylpiperidin-1-yl)oxy)-2-phenylpent-2-en-1-yl)diphenyl phosphine oxide (3ah)**

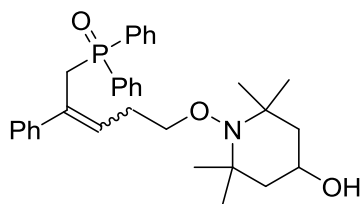

Colourless oil; (16 mg, 16%);  $R_f = 0.14$  (hexanes/ethyl acetate 1:1);  $^1\text{H NMR}$  (400 MHz,  $\text{CDCl}_3$ ):  $\delta$  7.65–7.60 (m, 4H), 7.41 (dt,  $J = 1.2$  Hz,  $J = 7.6$  Hz, 2H), 7.32 (dt,  $J = 3.2$  Hz,  $J = 7.6$  Hz, 4H), 7.09 (brs, 5H), 5.84 (dd,  $J = 7.2$  Hz,  $J = 12.4$  Hz, 1H), 3.95–3.88 (m, 1H), 3.76 (t,  $J = 6.4$  Hz, 2H), 3.68 (d,  $J = 14.8$  Hz, 2H), 2.40–2.34 (m, 2H), 1.77 (m, 2H), 1.43 (t,  $J = 12.0$  Hz, 2H), 1.15 (s, 6H), 1.12 (s, 6H);  $^{13}\text{C NMR}$  (100 MHz,  $\text{CDCl}_3$ ):  $\delta$  143.1 (d,  $J_{\text{C-P}} = 1.0$  Hz), 132.6 (d,  $J_{\text{C-P}} = 87.0$  Hz), 131.6 (d,  $J_{\text{C-P}} = 9.0$  Hz), 131.5 (d,  $J_{\text{C-P}} = 3.0$  Hz), 131.2 (d,  $J_{\text{C-P}} = 10.0$  Hz), 131.0 (d,  $J_{\text{C-P}} = 9.0$  Hz), 128.2 (d,  $J_{\text{C-P}} = 12.0$  Hz), 127.9, 126.7, 126.5, 75.8, 63.1, 60.0, 48.1, 33.7 (d,  $J_{\text{C-P}} = 67.0$  Hz), 33.1, 29.0, 21.0;  $^{31}\text{P NMR}$  ( $\text{CDCl}_3$ , 162 MHz): 24.3; ESI-HRMS (ESI,  $m/z$ ): Calcd for  $\text{C}_{32}\text{H}_{41}\text{NO}_3\text{P}$ ,  $[\text{M} + \text{H}]^+$ : 518.2819, found 518.2815.

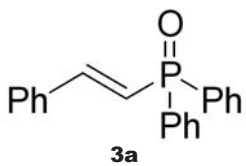

7.782  
7.763  
7.752  
7.734  
7.542  
7.528  
7.503  
7.484  
7.461  
7.382  
7.371  
7.227  
6.891  
6.847  
6.835  
6.791

0.000

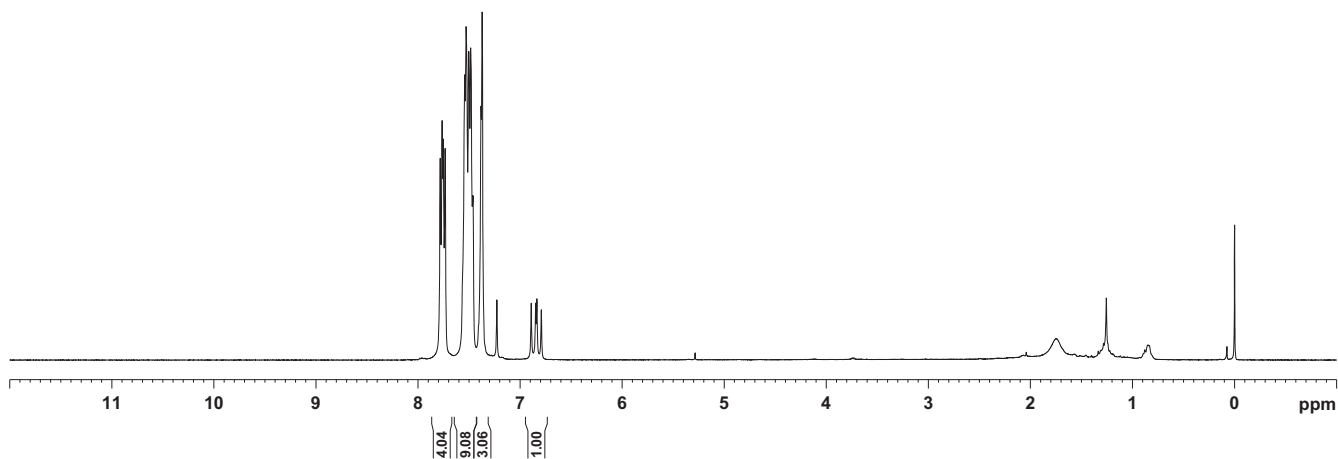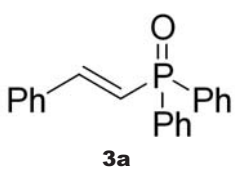

146.95  
146.92  
134.50  
134.32  
132.71  
131.66  
131.27  
131.25  
130.77  
130.69  
128.44  
128.27  
128.05  
127.93  
127.12  
119.00  
117.96

77.32  
77.00  
76.68

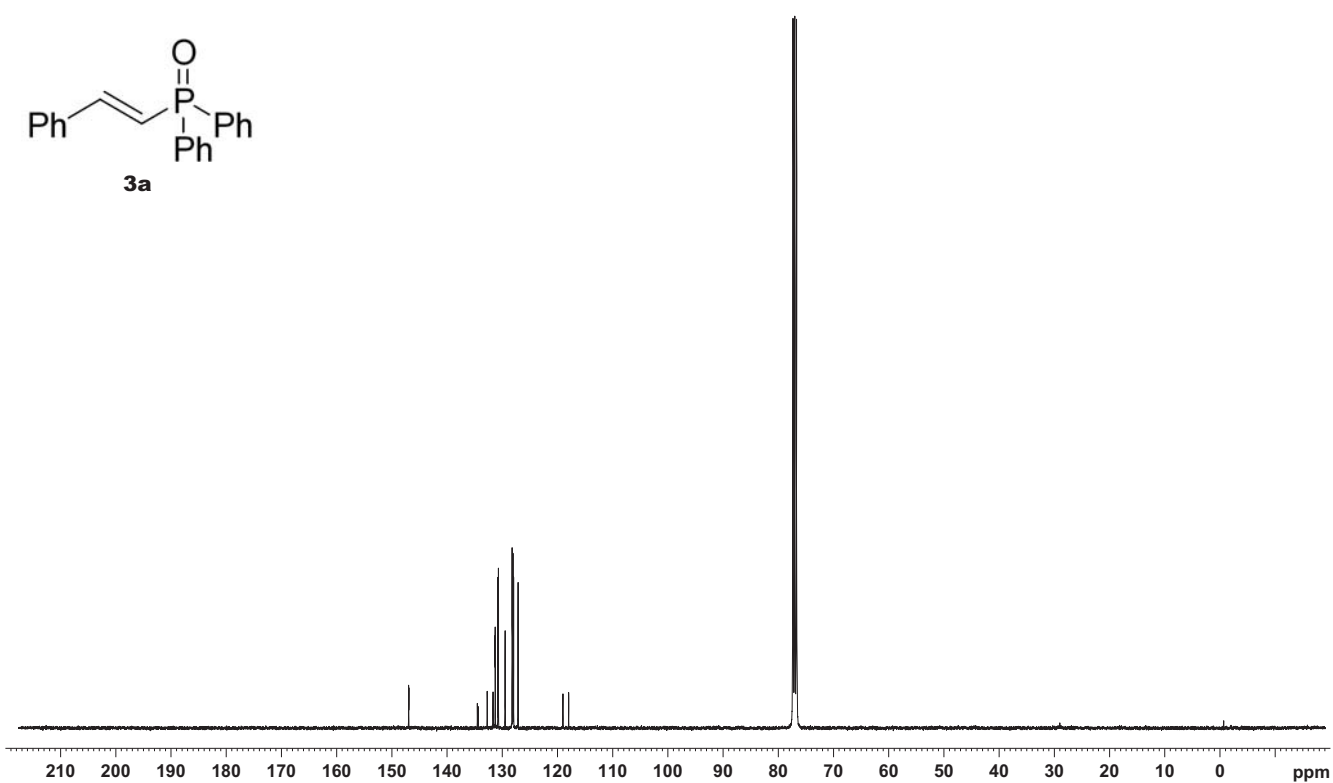

**S20**

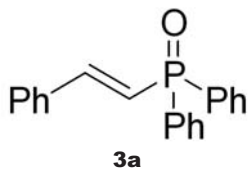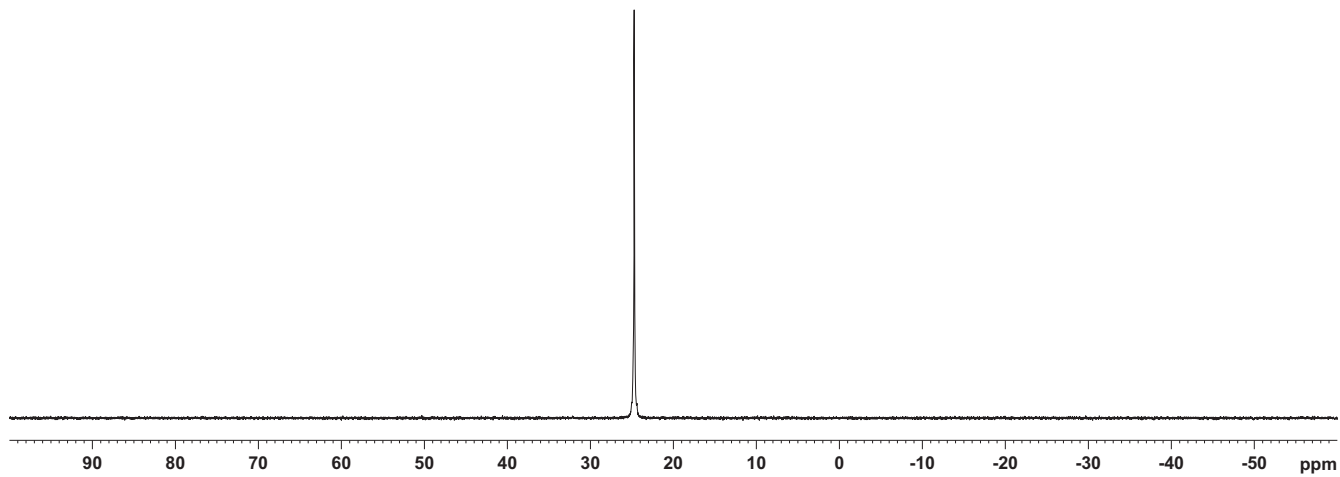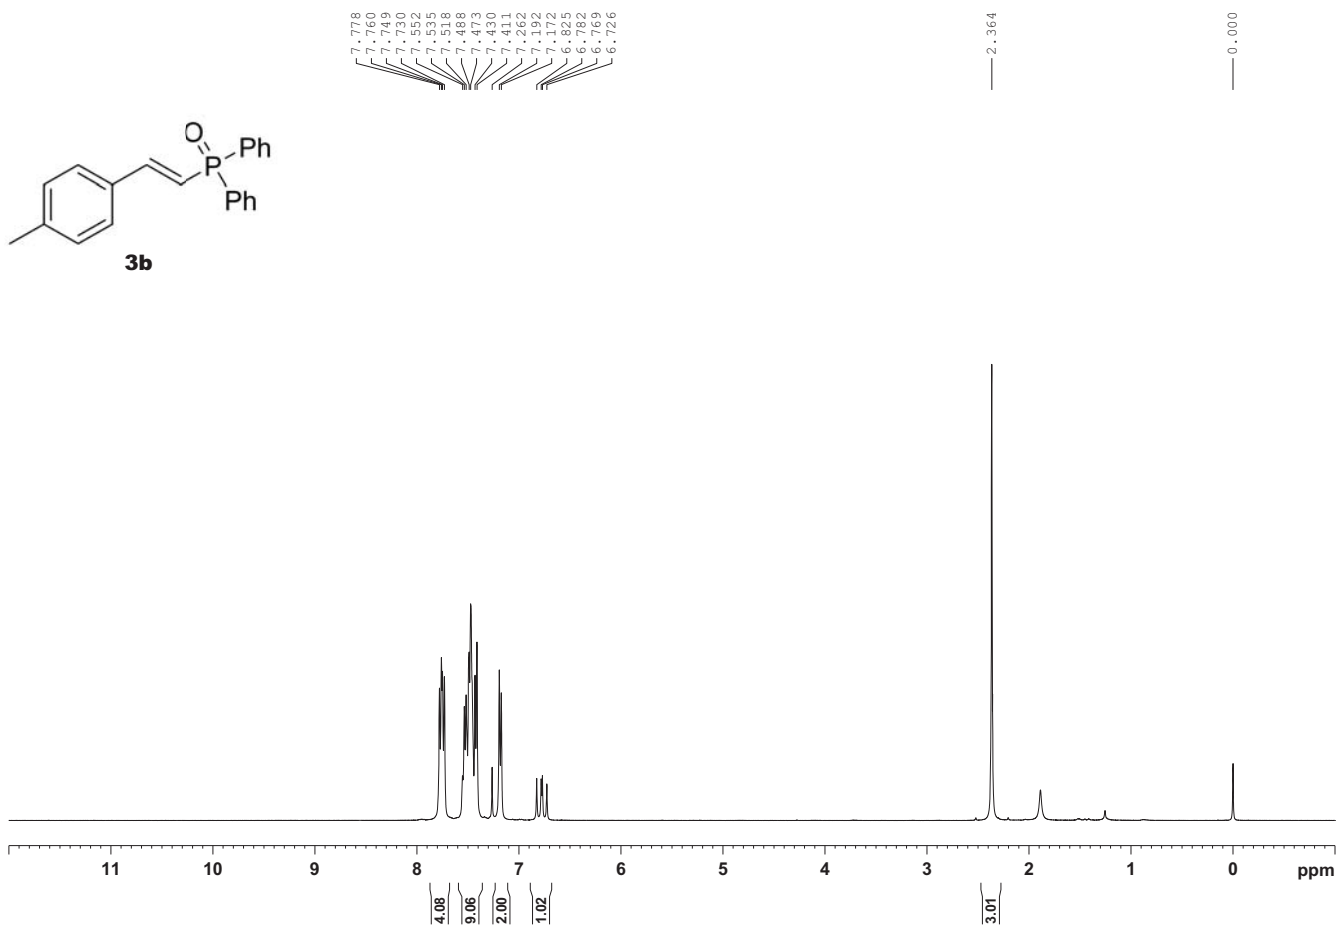

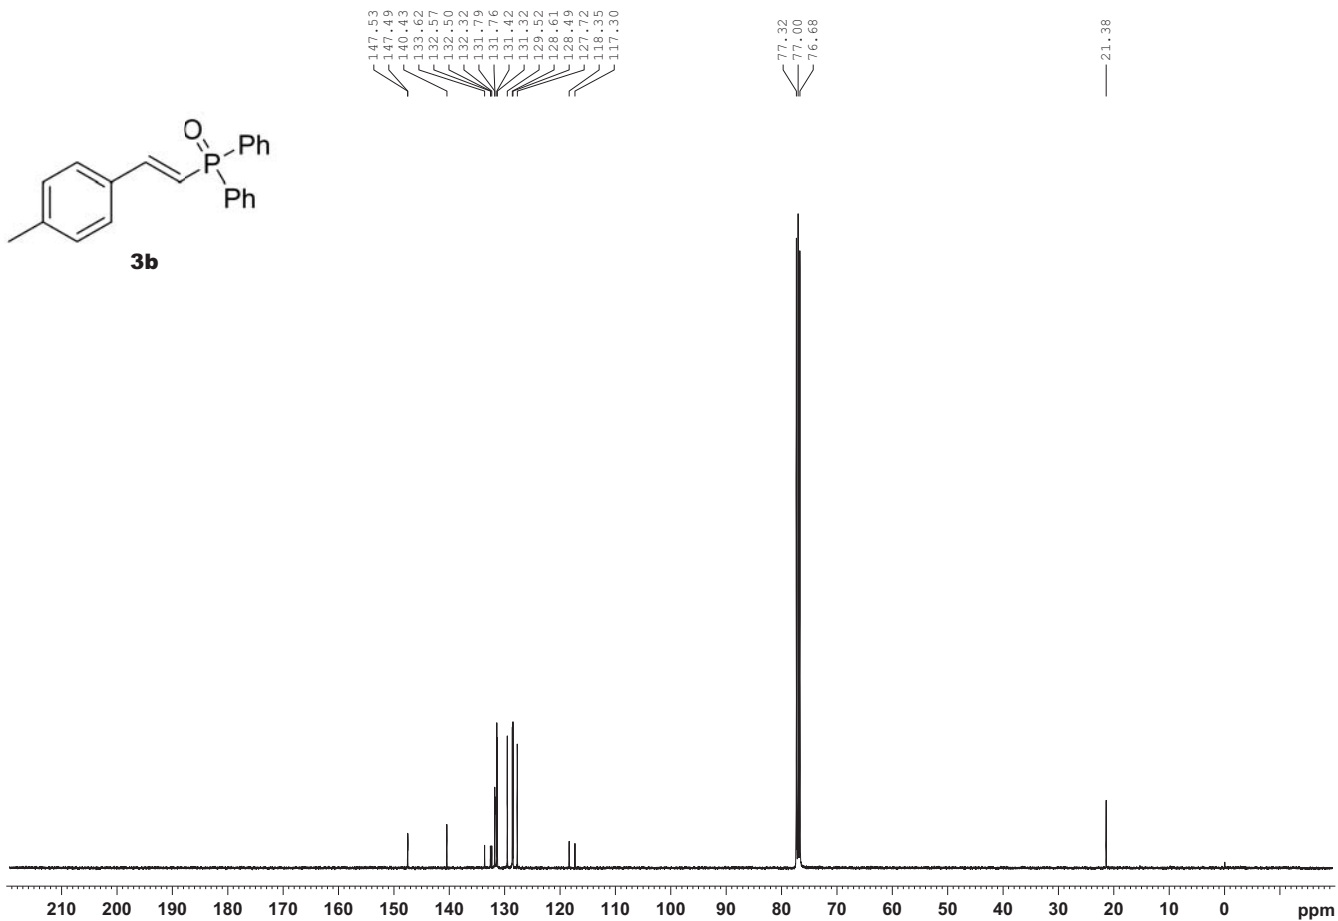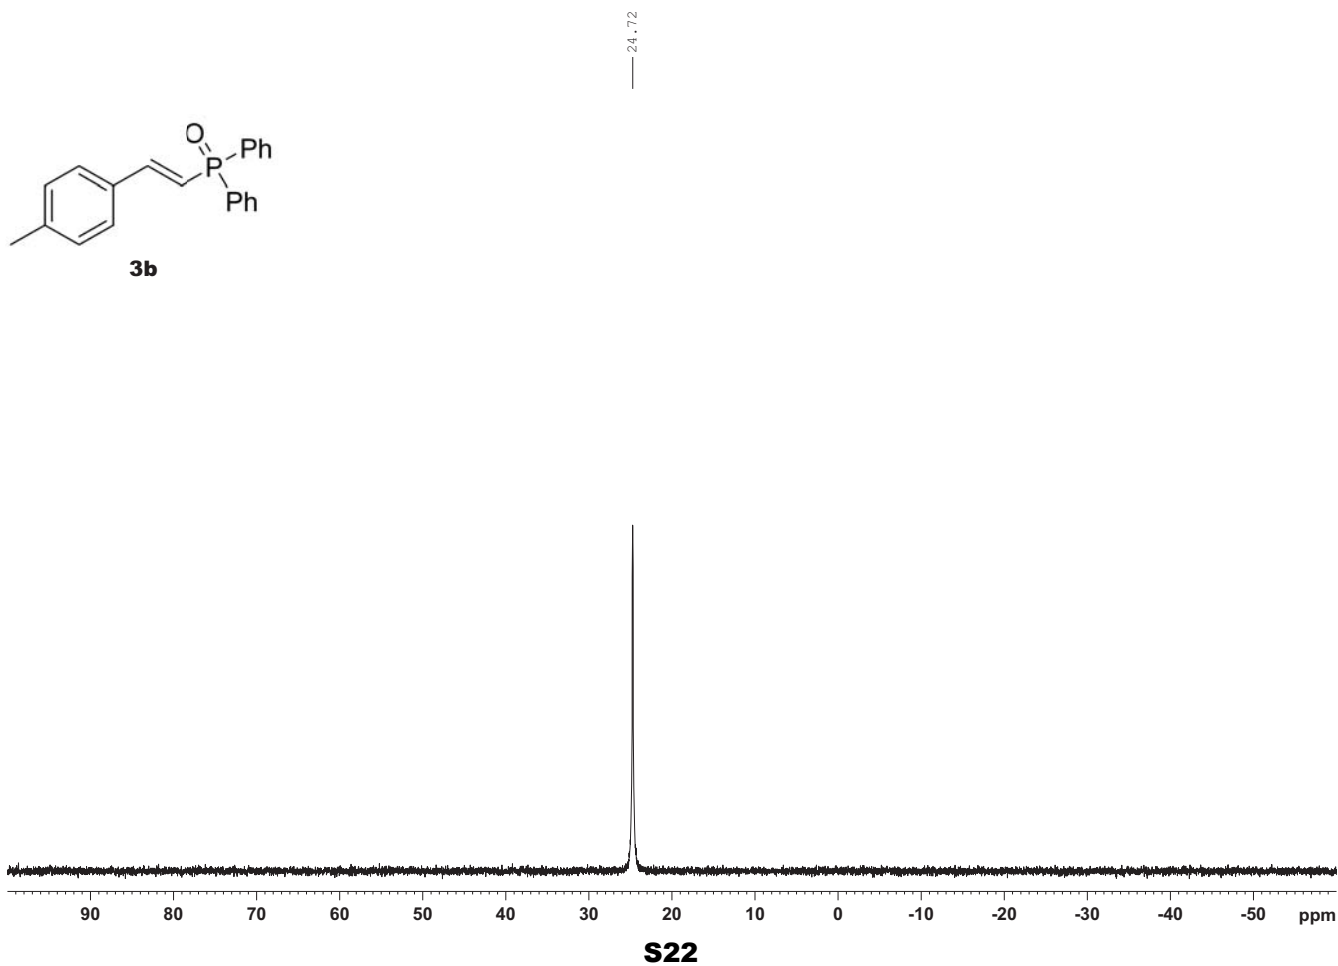

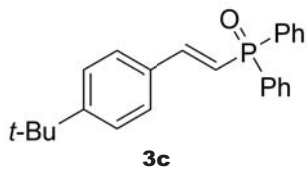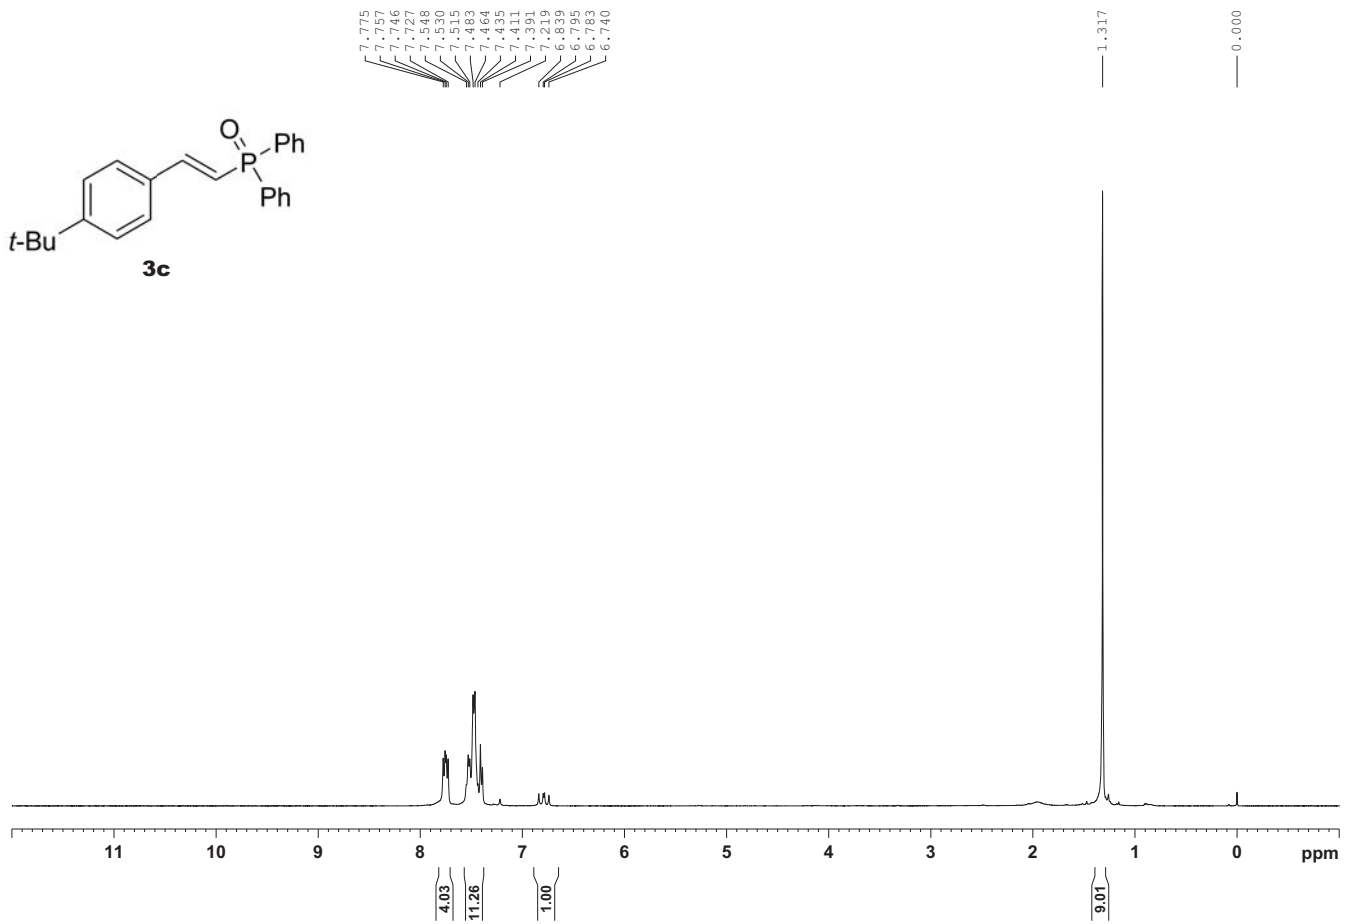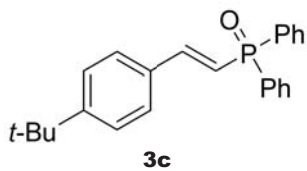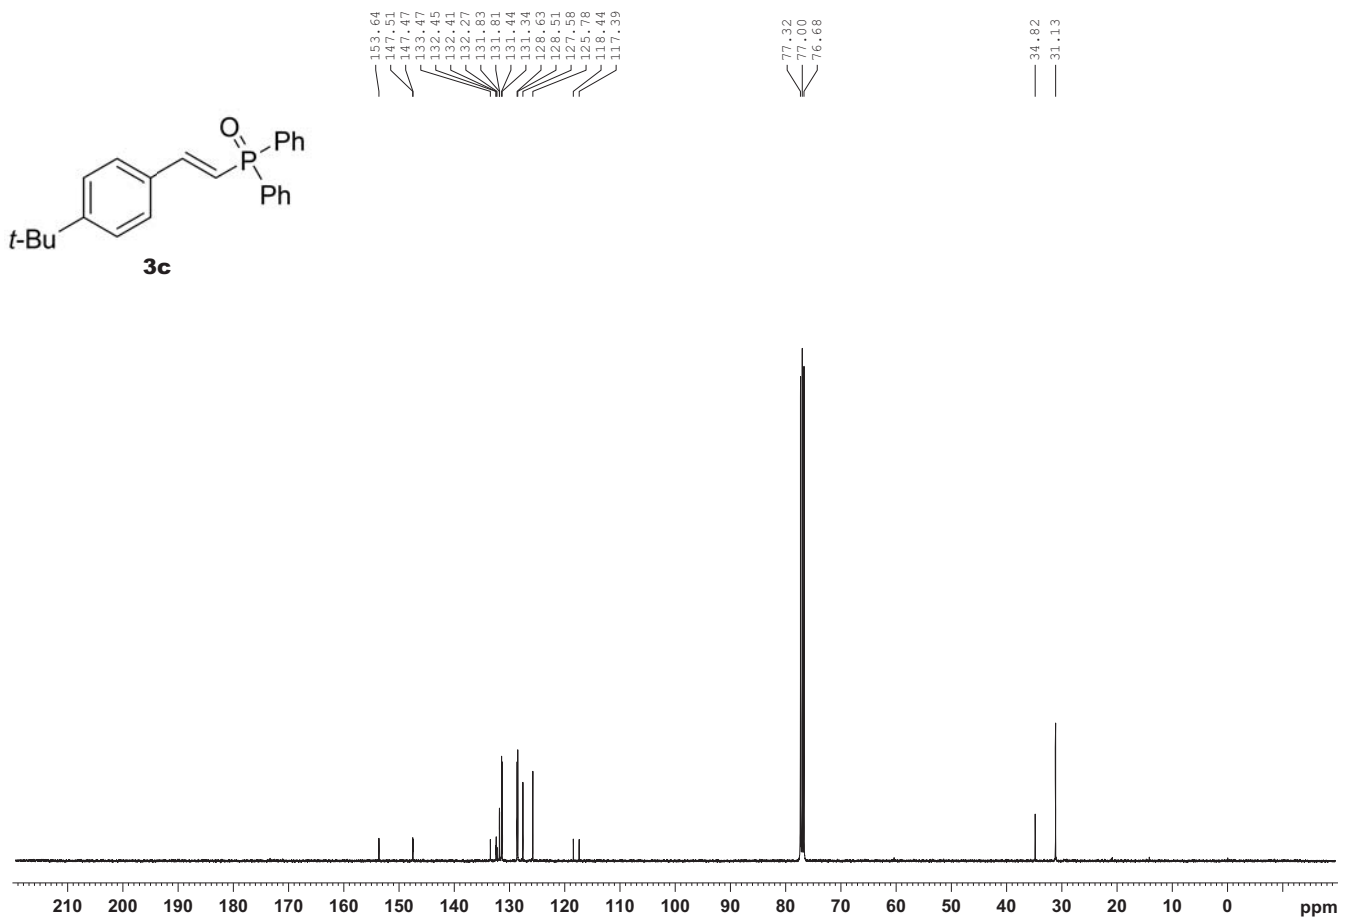

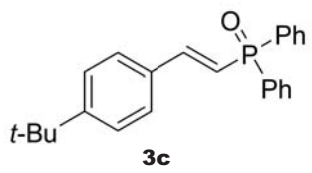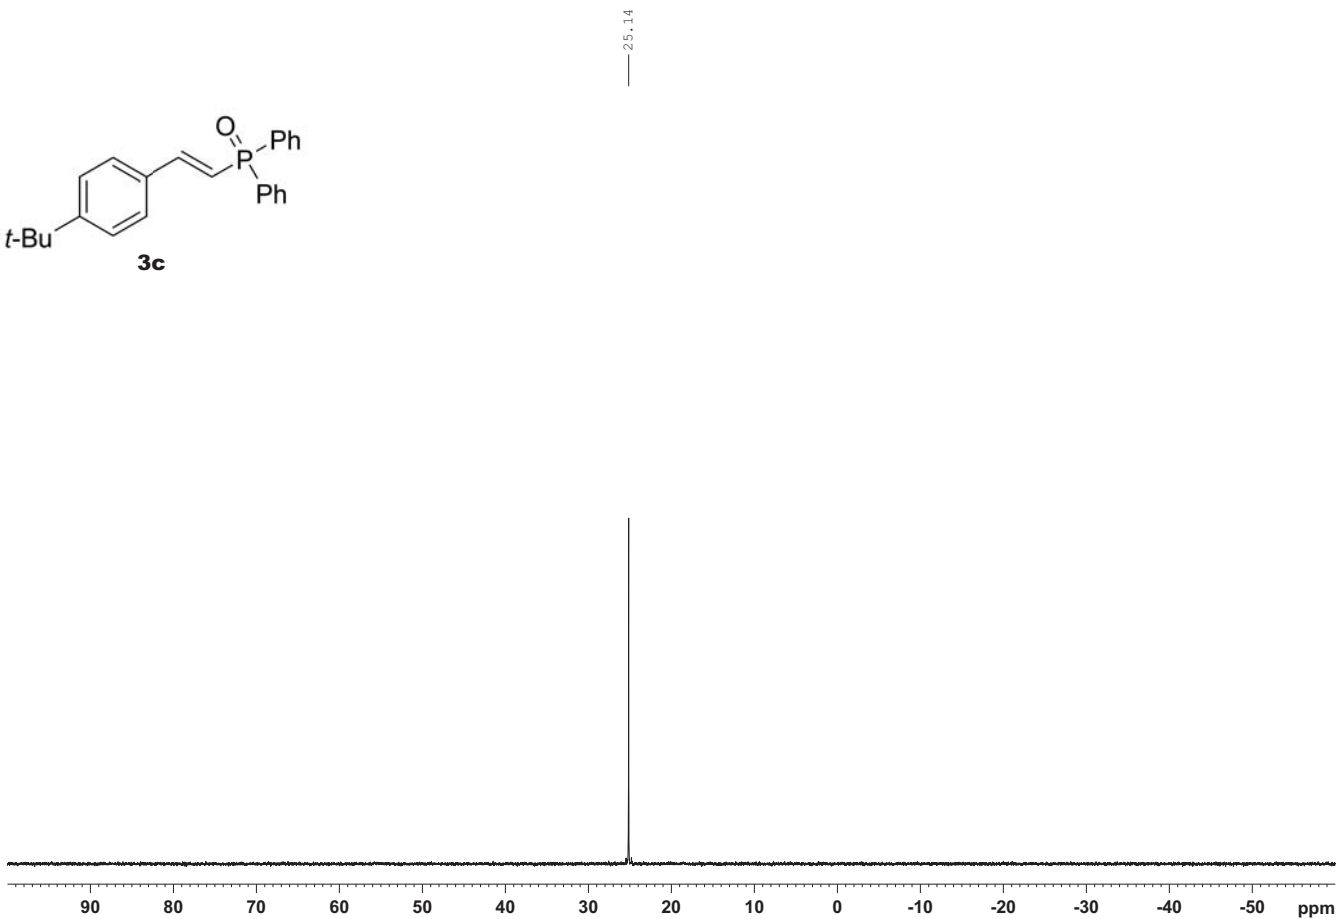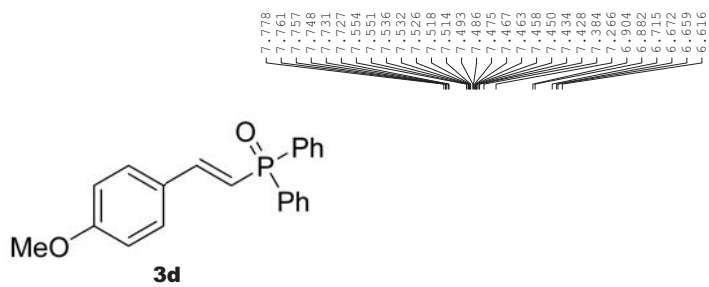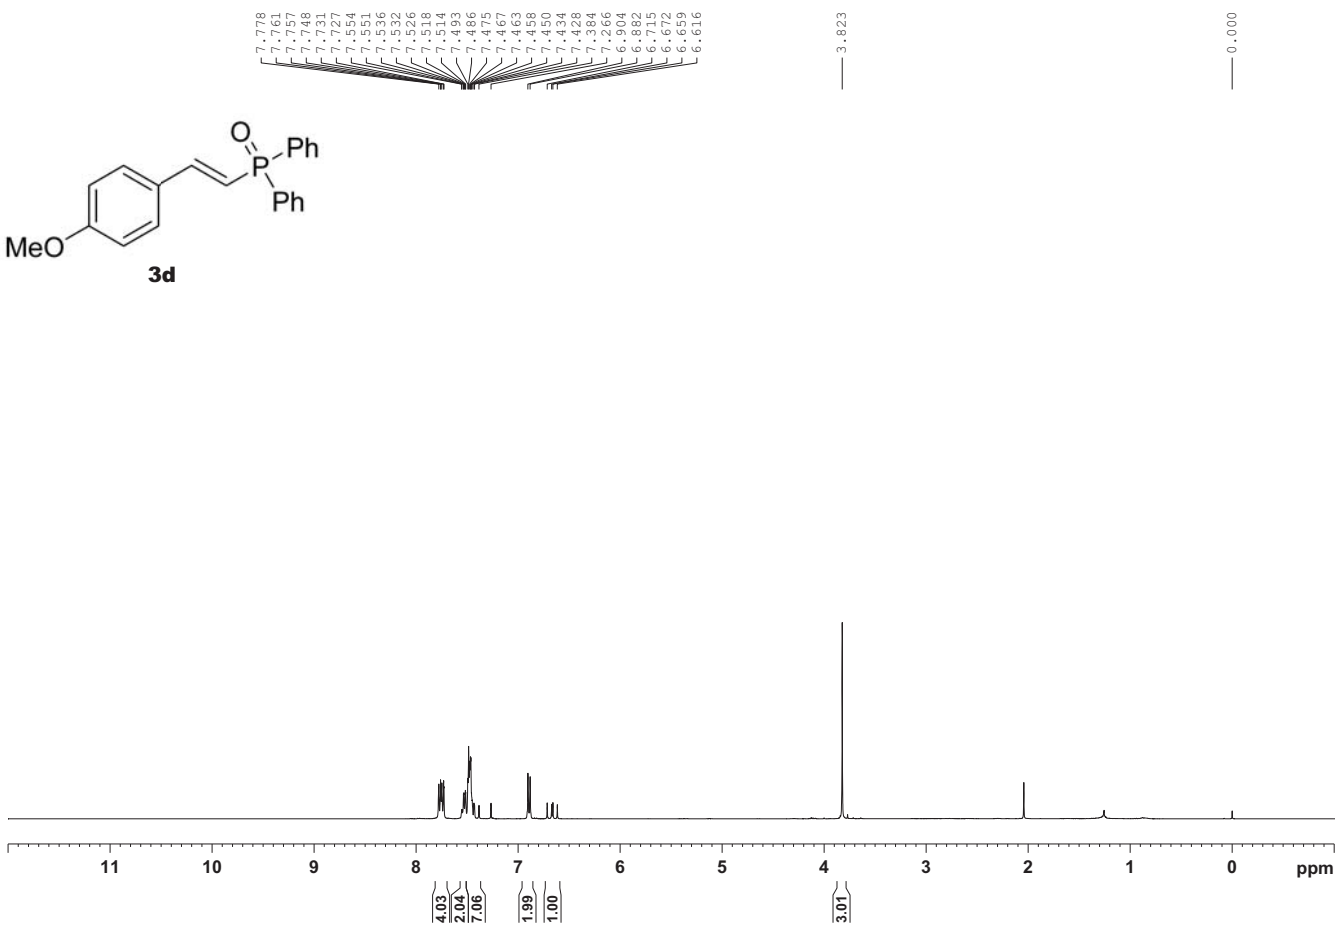



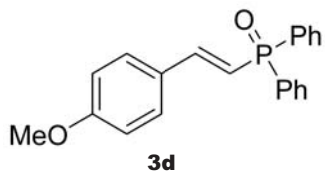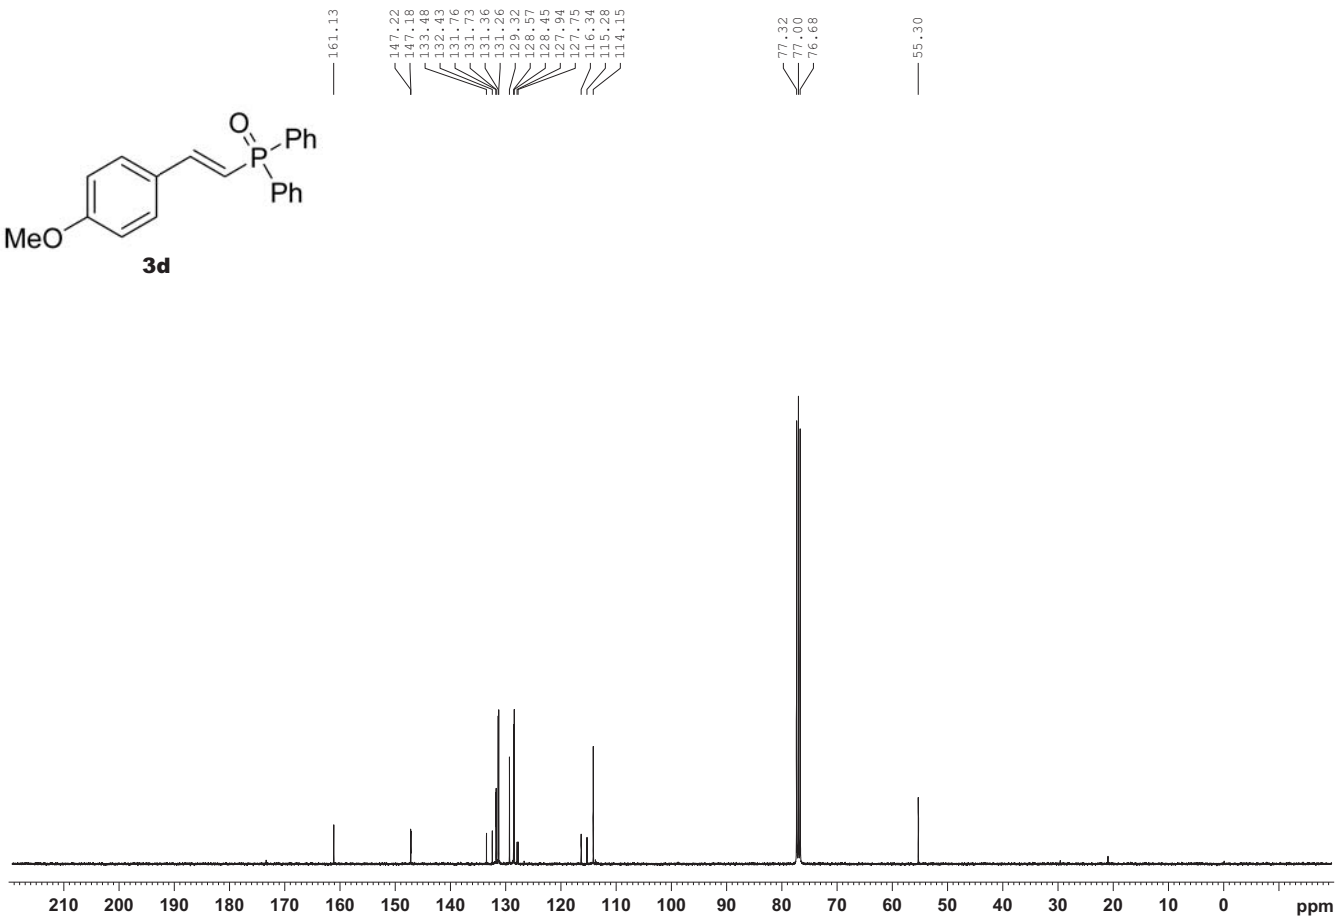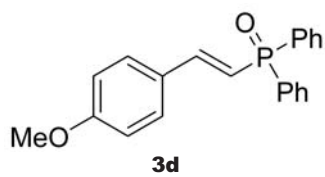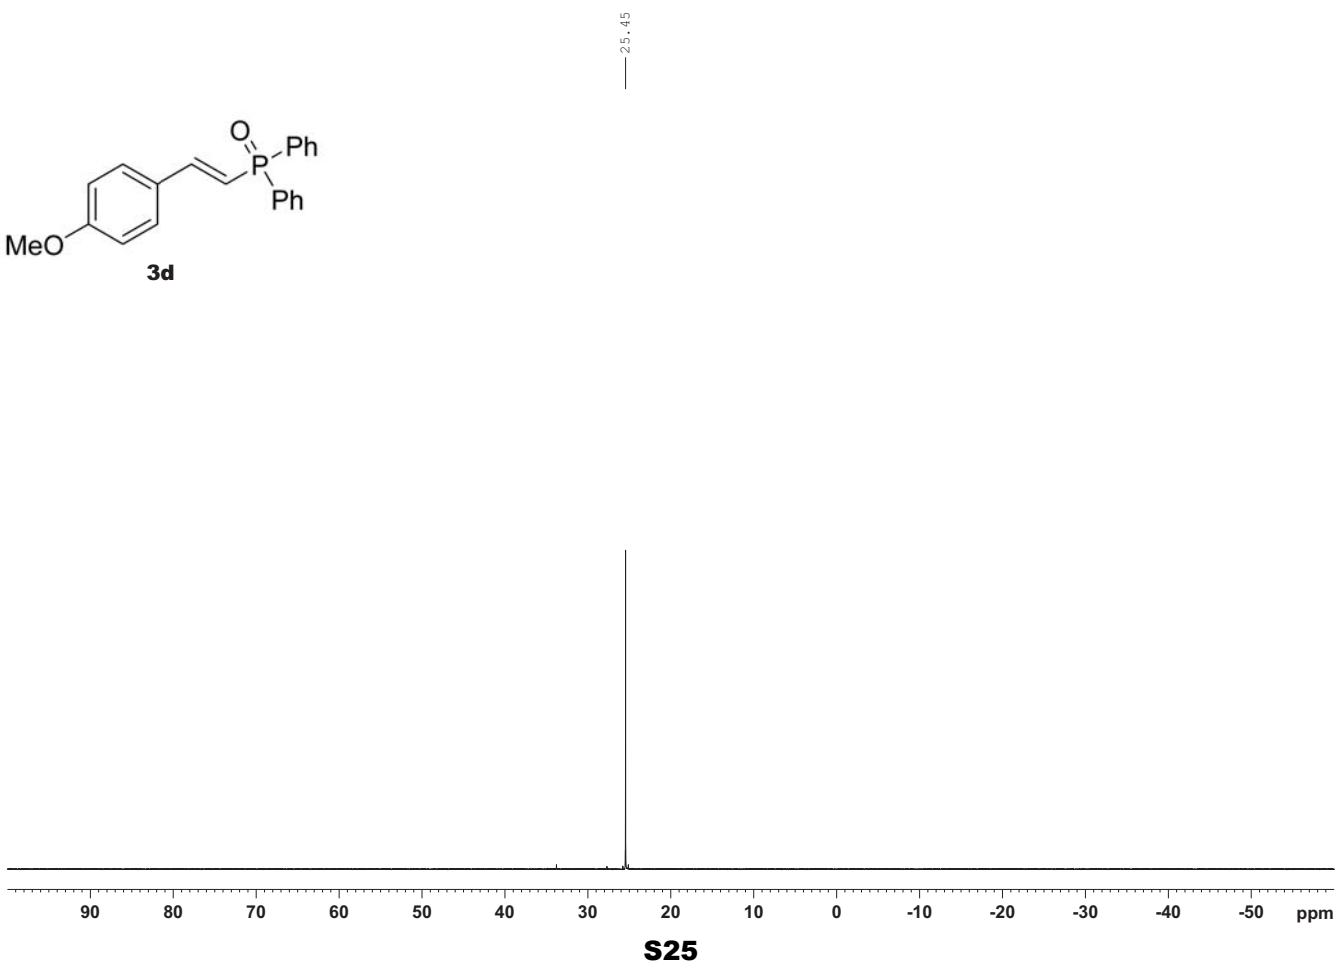

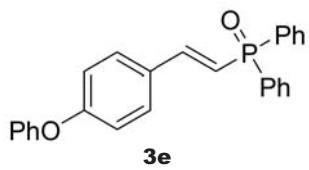

7.780  
7.762  
7.751  
7.732  
7.751  
7.533  
7.516  
7.500  
7.494  
7.479  
7.424  
7.353  
7.334  
7.257  
7.161  
7.143  
7.125  
7.037  
7.017  
6.986  
6.965  
6.777  
6.734  
6.722  
6.678

-0.000

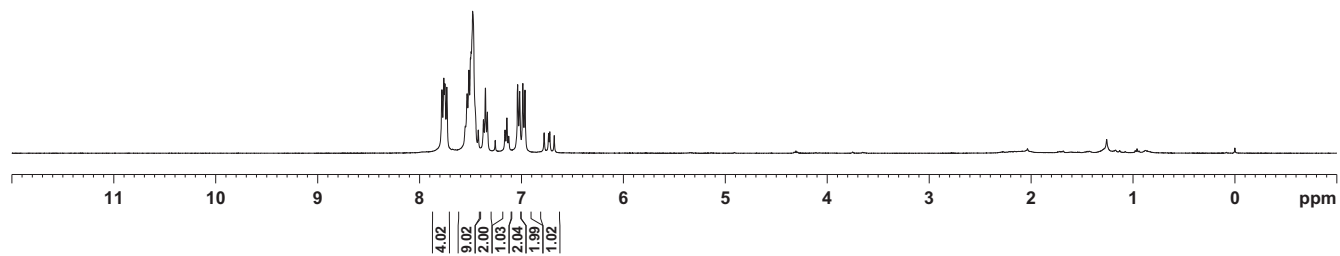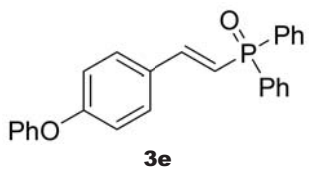

159.11  
156.08  
146.63  
139.34  
132.39  
131.73  
131.71  
131.29  
131.20  
129.96  
129.78  
129.30  
128.54  
128.42  
123.89  
119.41  
118.32  
117.99  
116.94

77.32  
77.00  
76.68

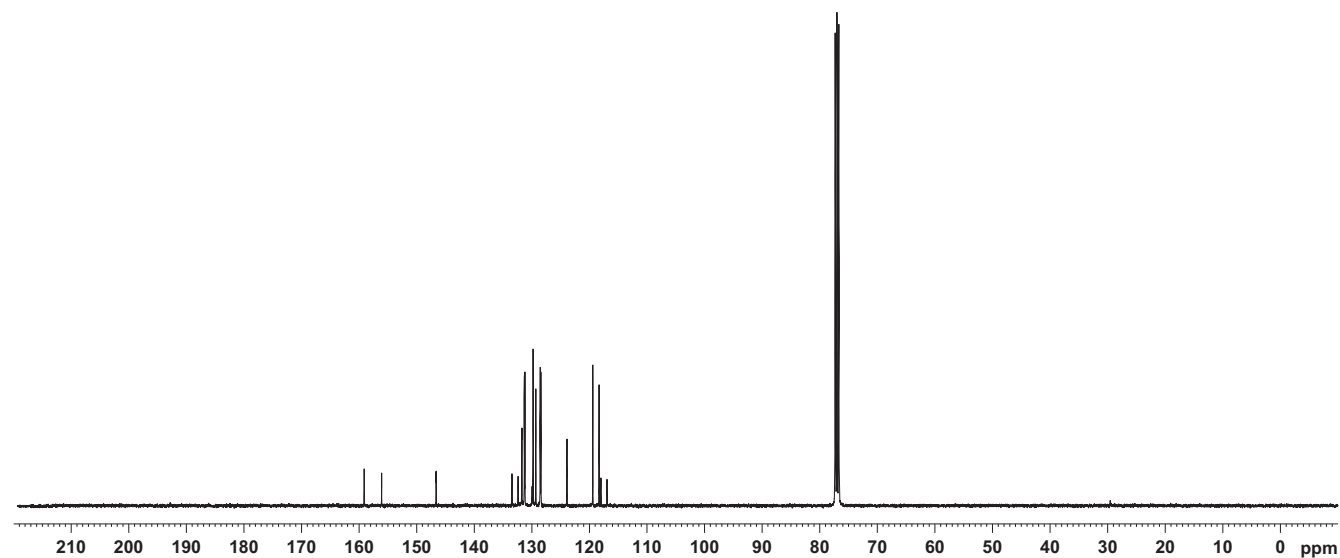

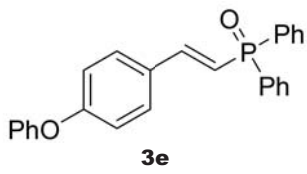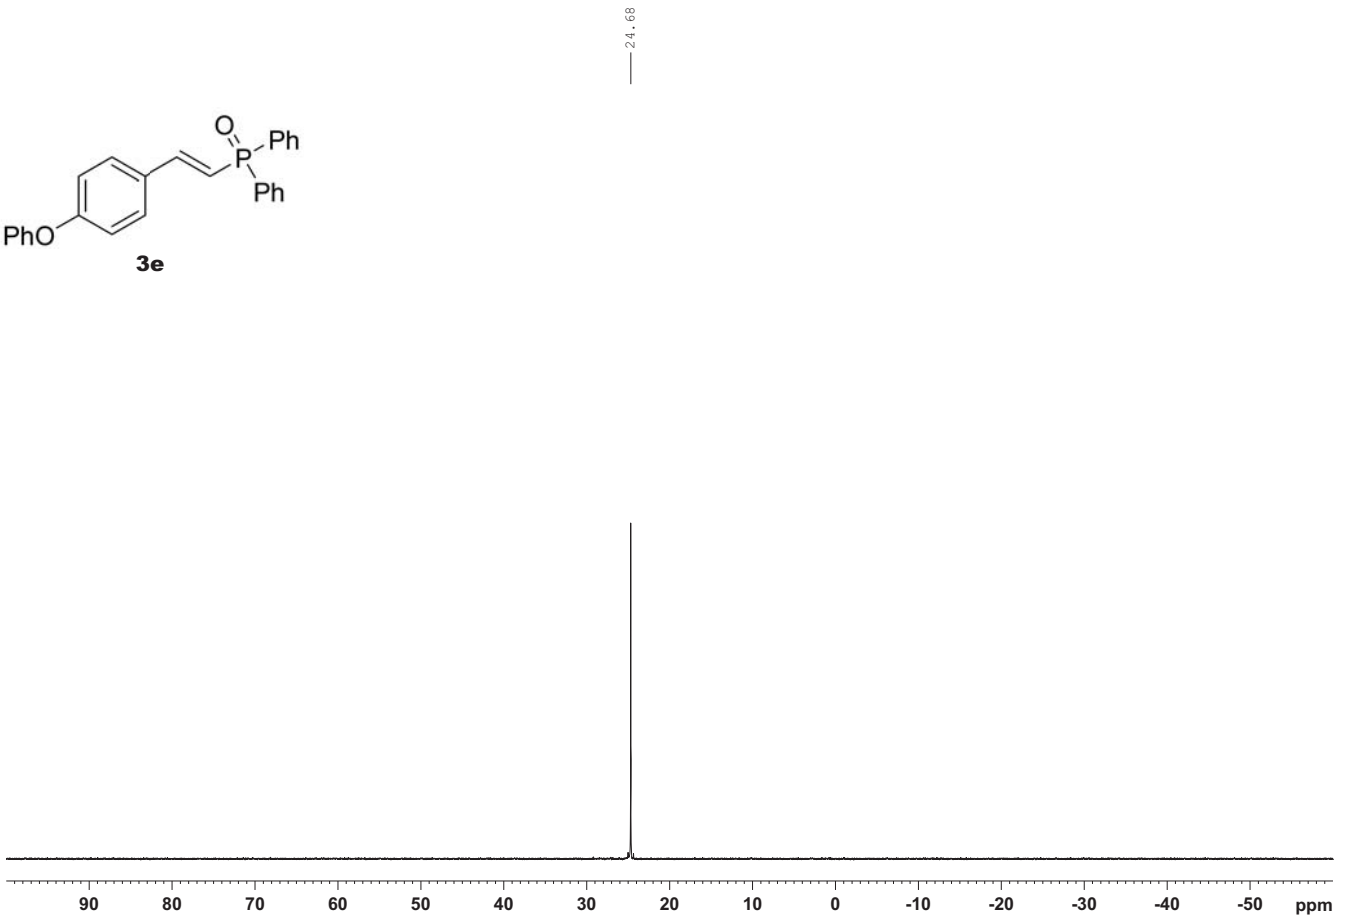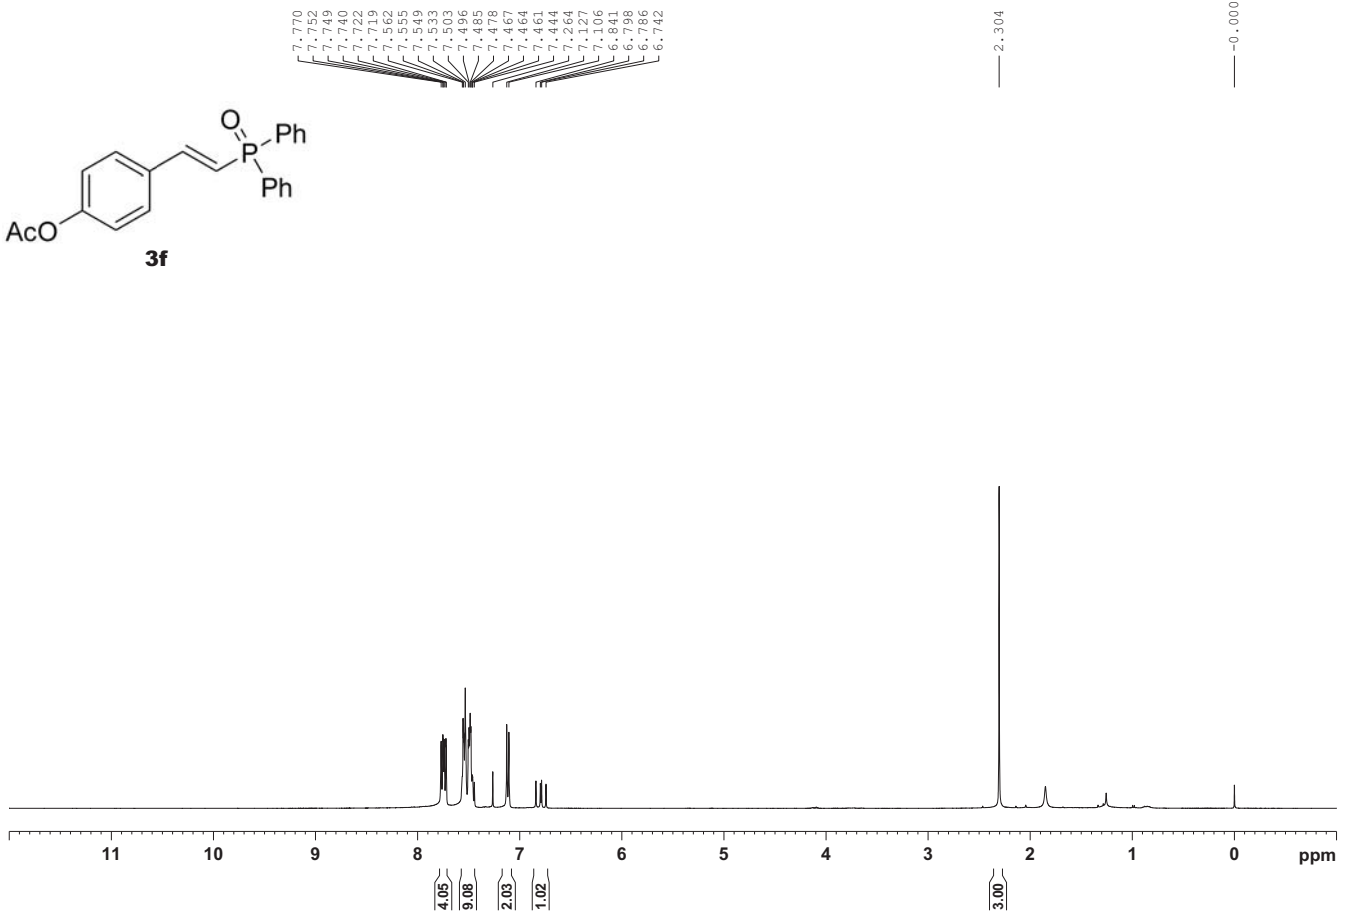

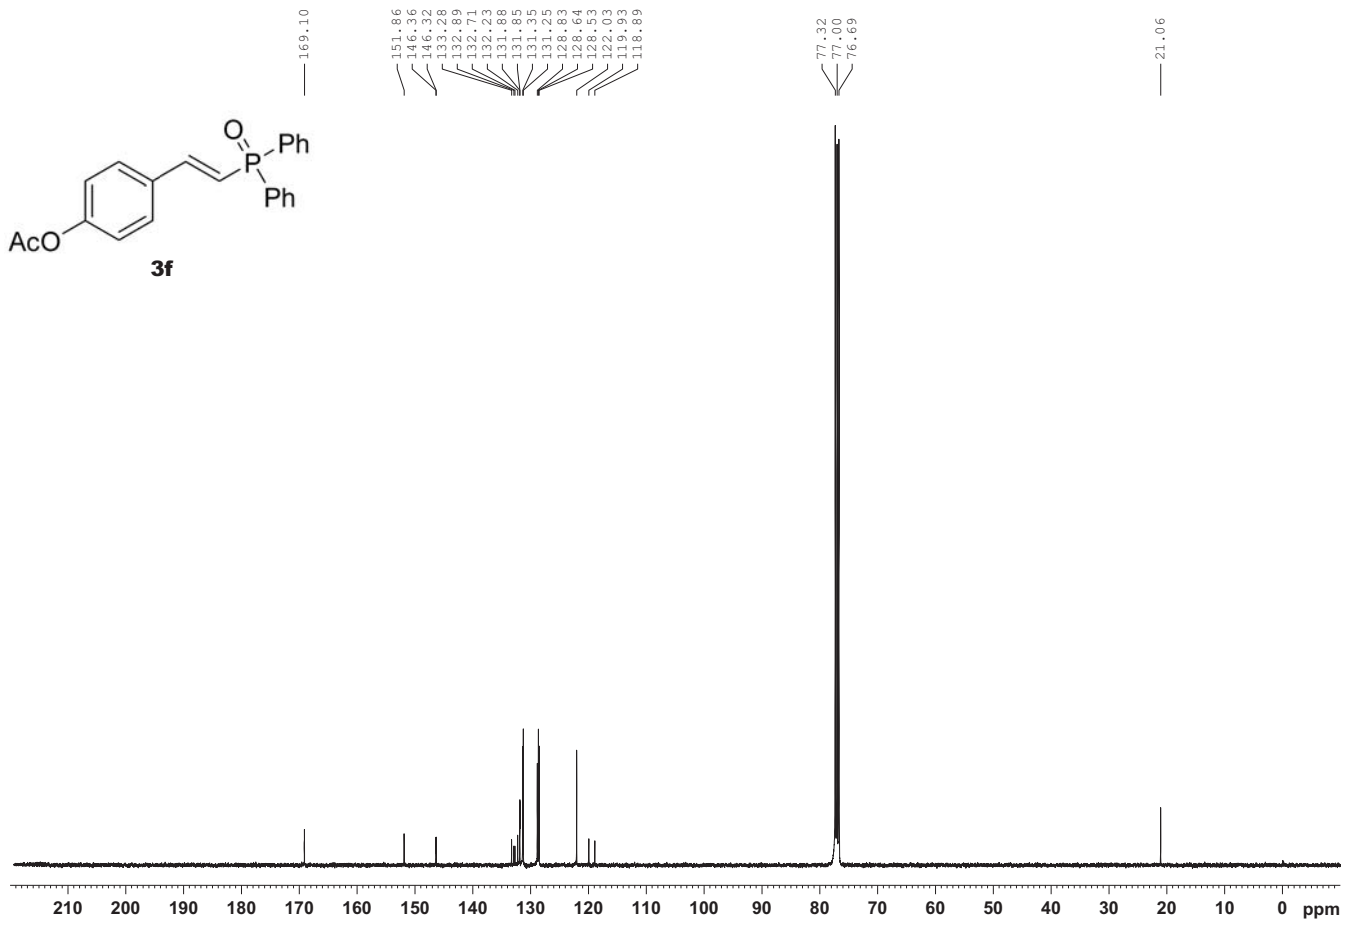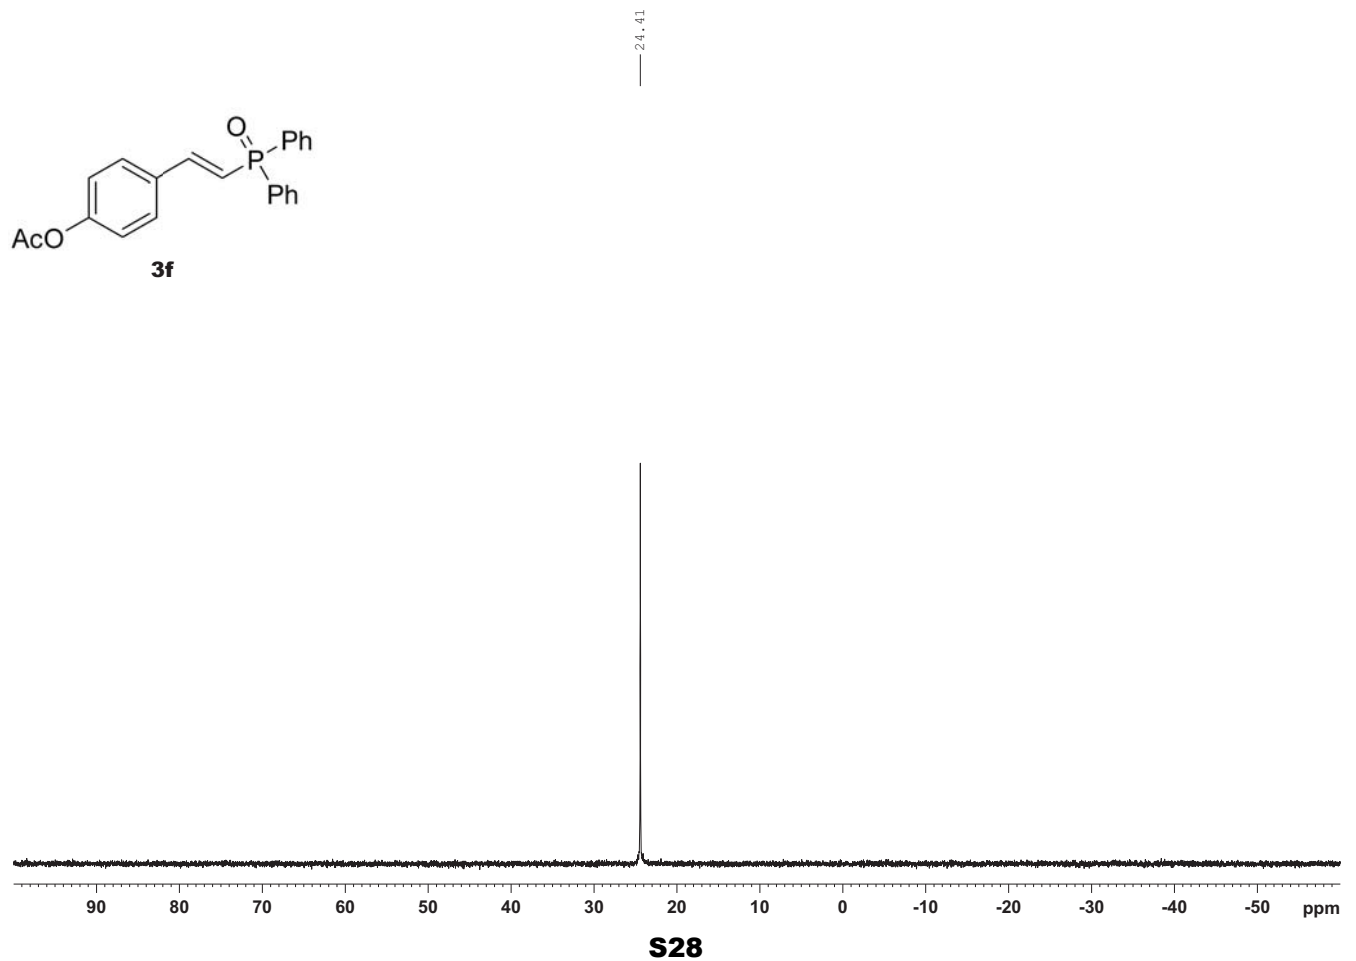

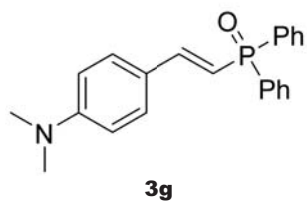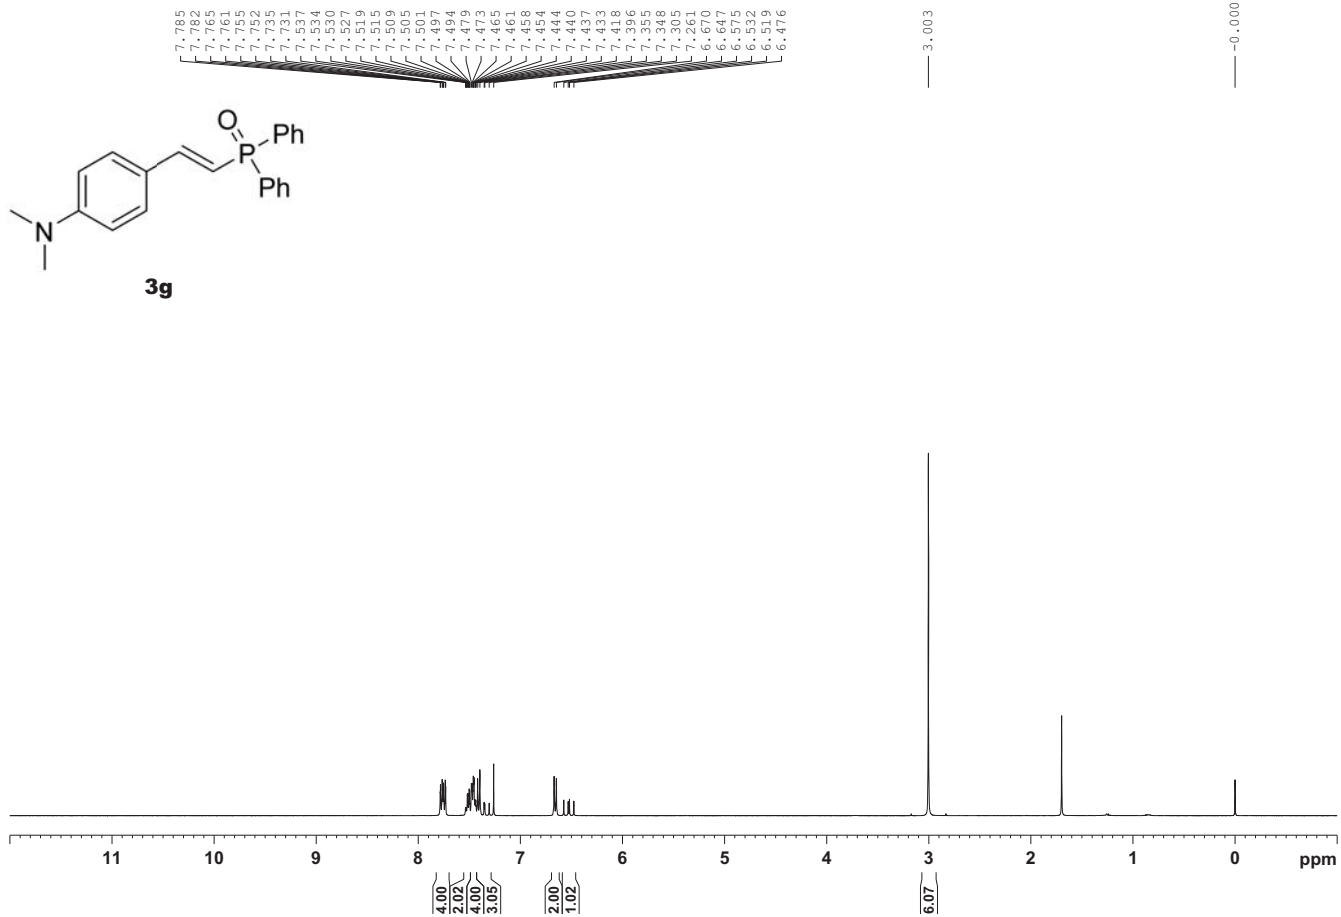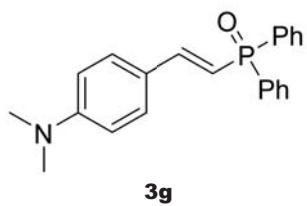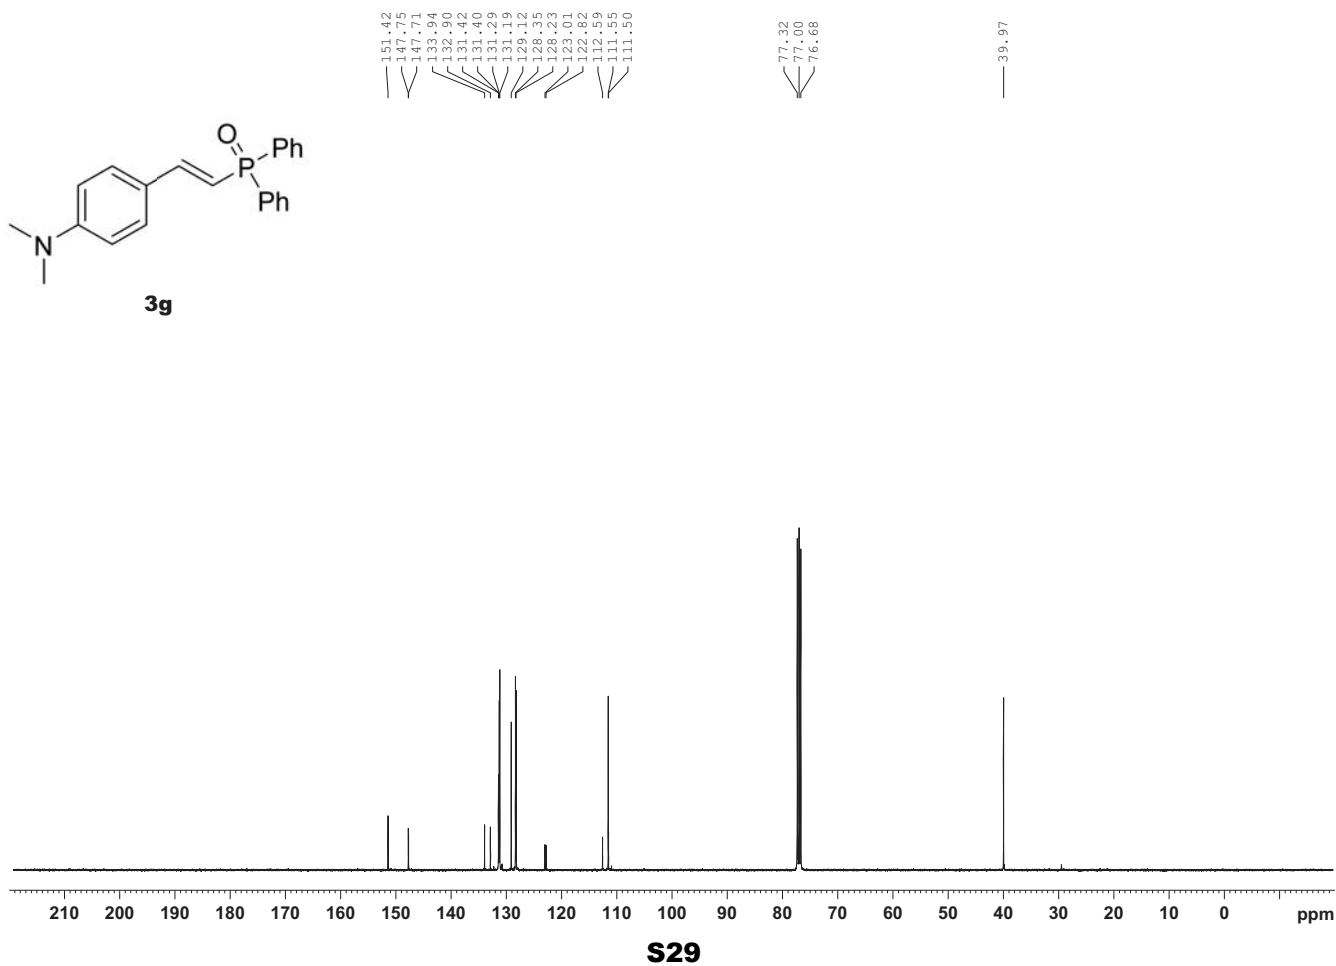

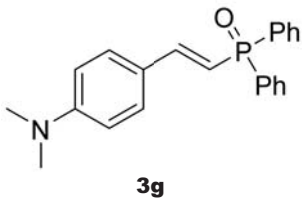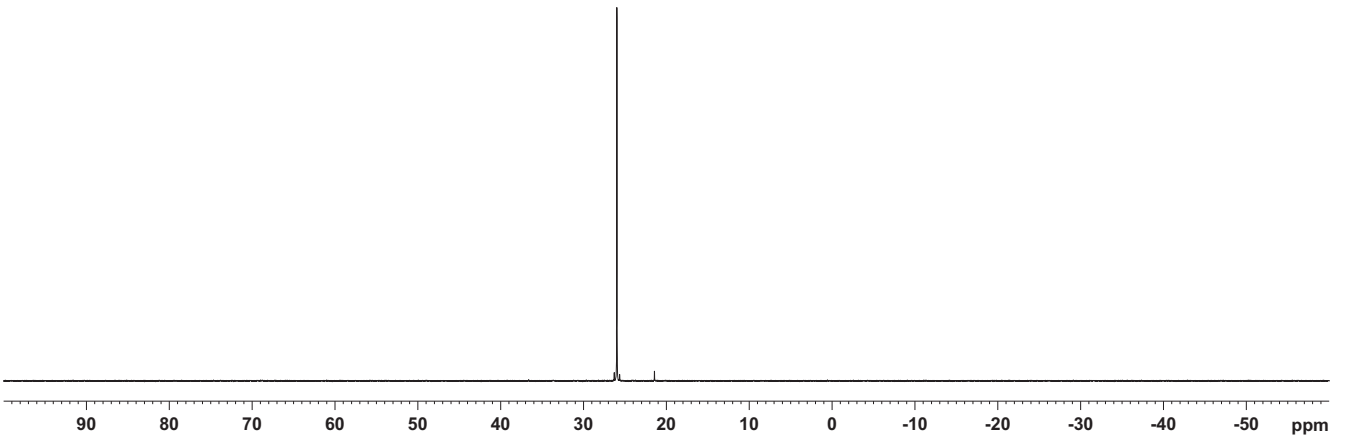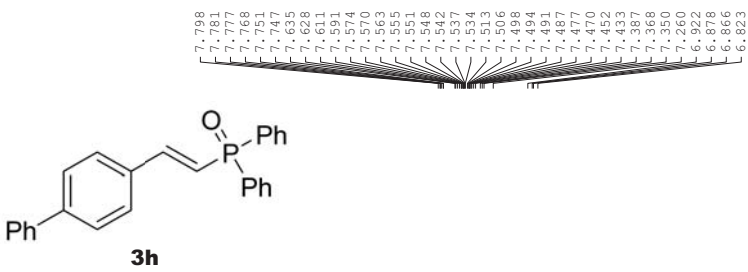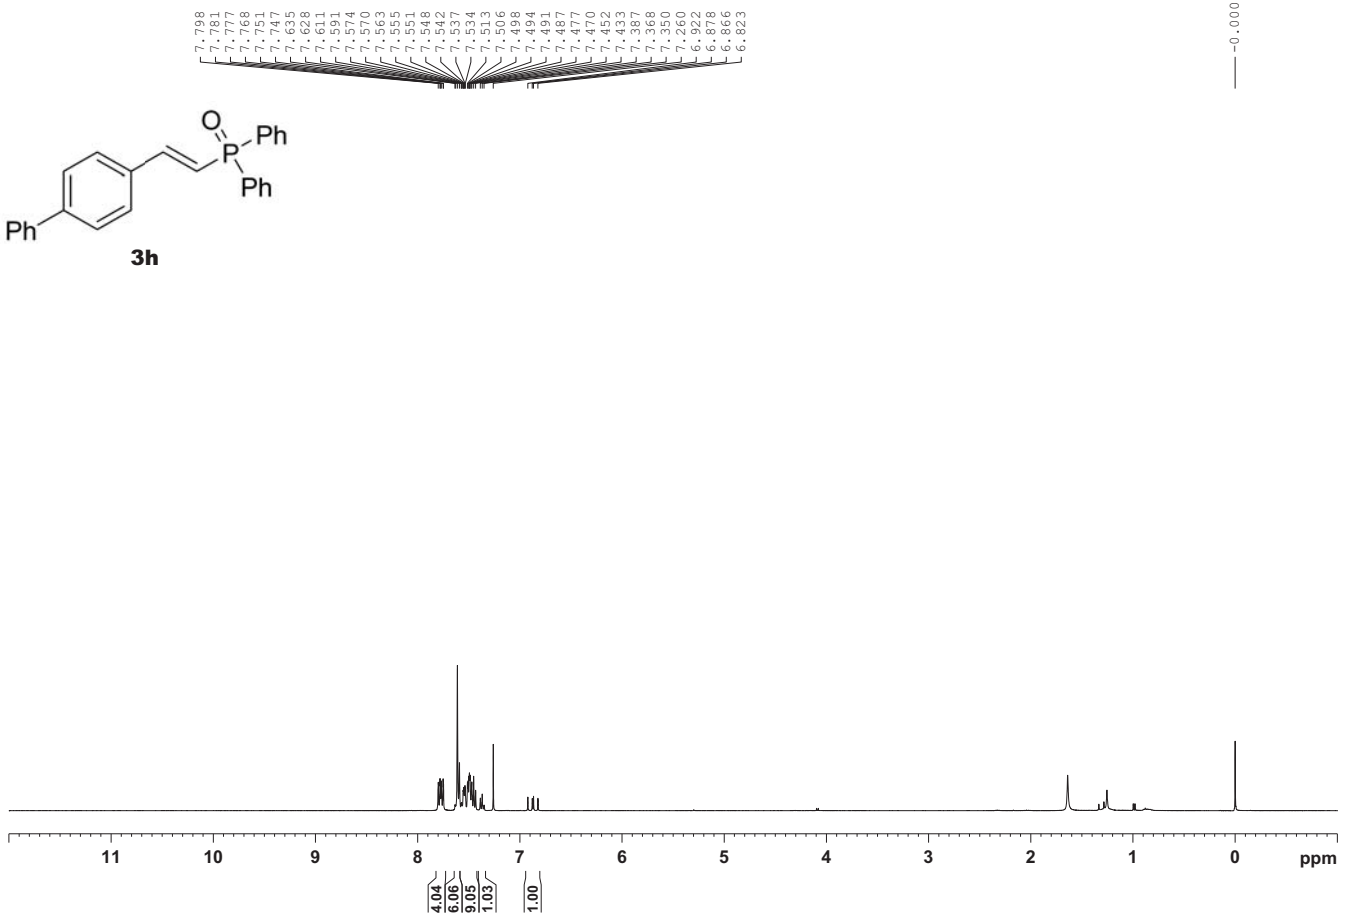

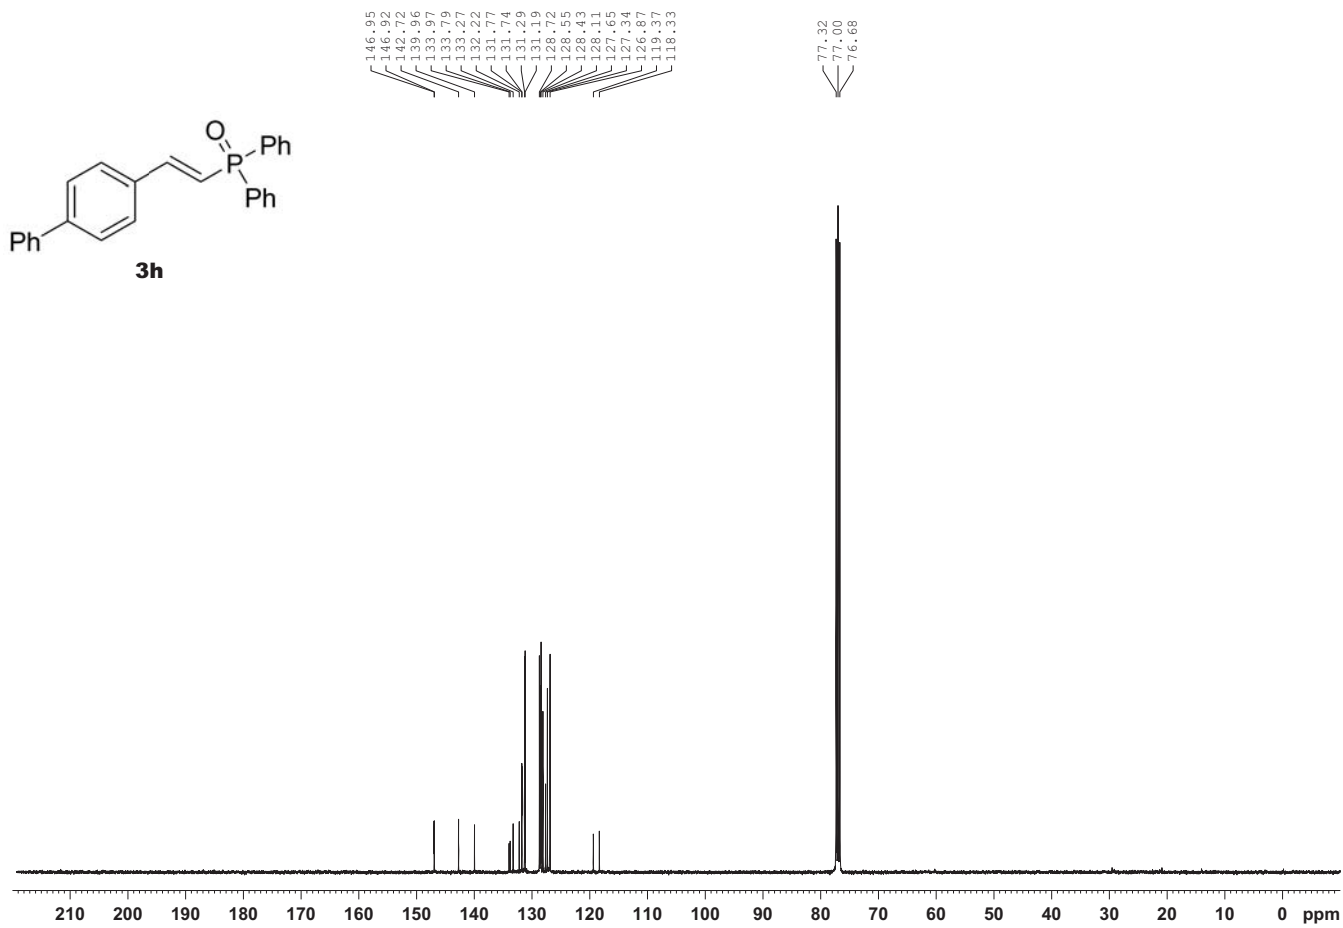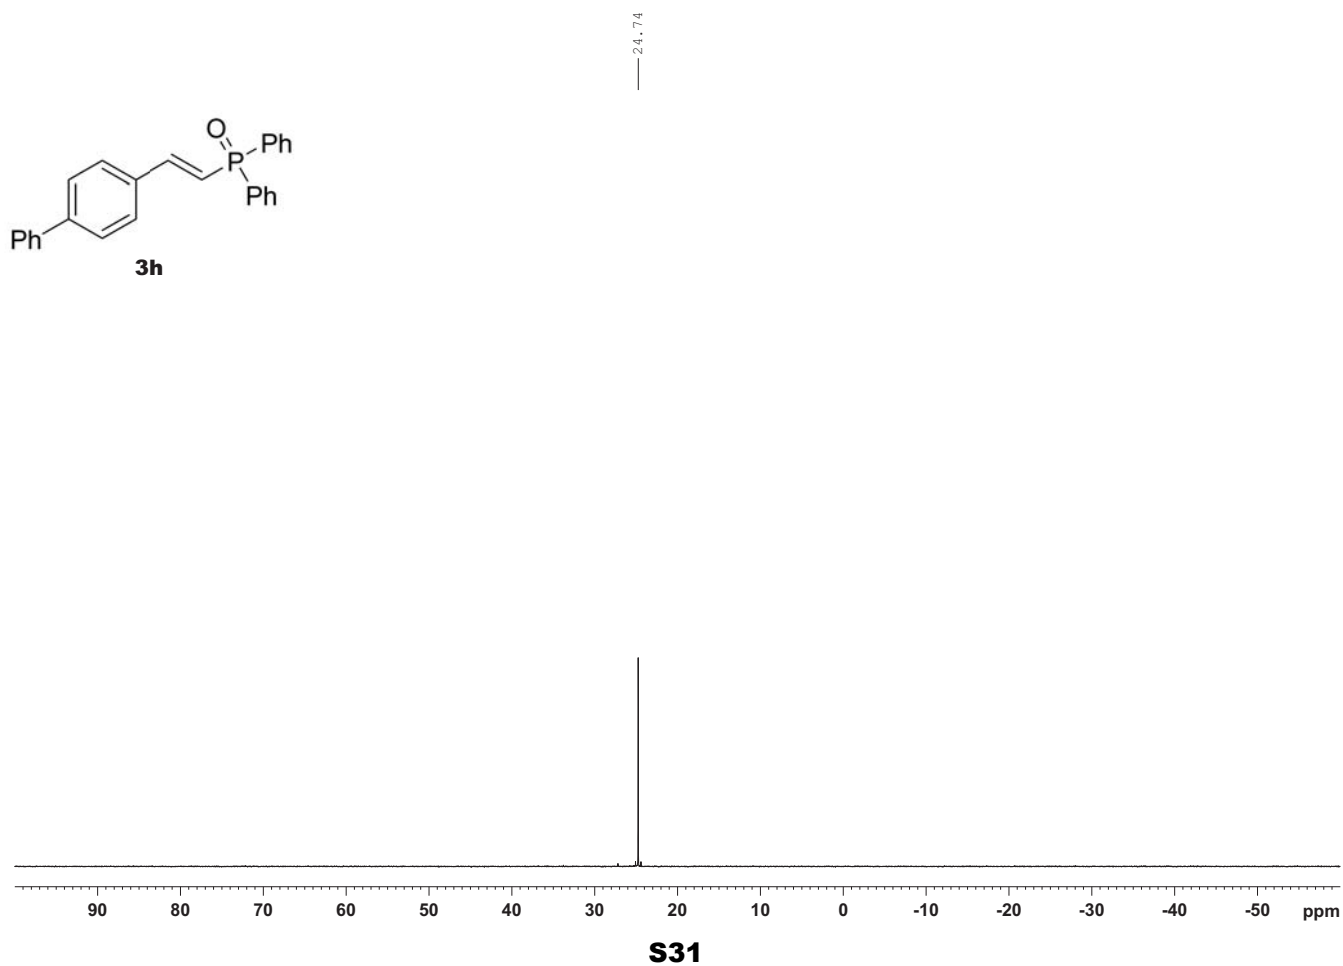

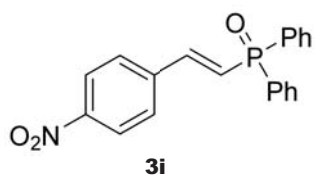

8.249  
 8.230  
 7.783  
 7.763  
 7.737  
 7.691  
 7.671  
 7.606  
 7.579  
 7.564  
 7.512  
 7.270  
 7.088  
 7.036  
 6.991

— 0.000

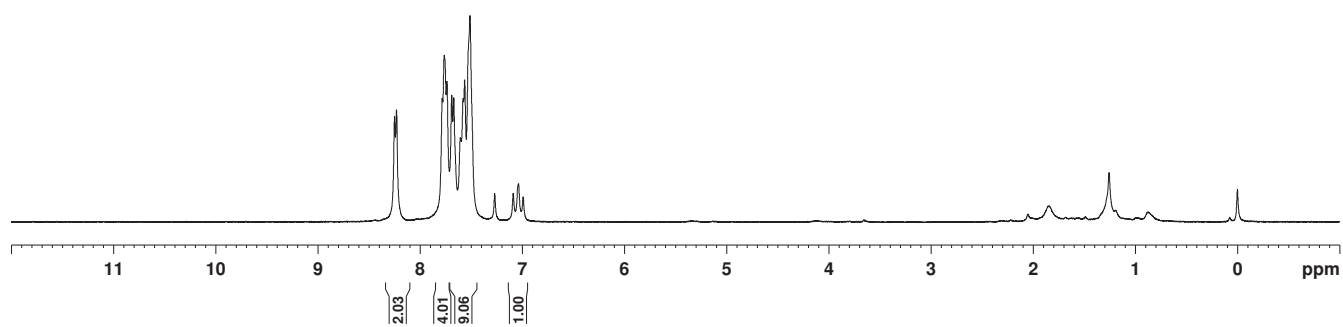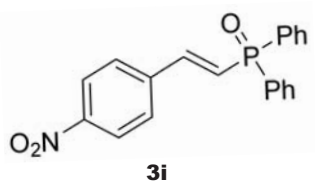

146.35  
 144.62  
 144.58  
 141.08  
 140.91  
 132.60  
 132.24  
 132.21  
 131.54  
 131.36  
 131.26  
 128.85  
 128.73  
 128.40  
 125.23  
 124.23  
 124.13

77.32  
 77.00  
 76.68

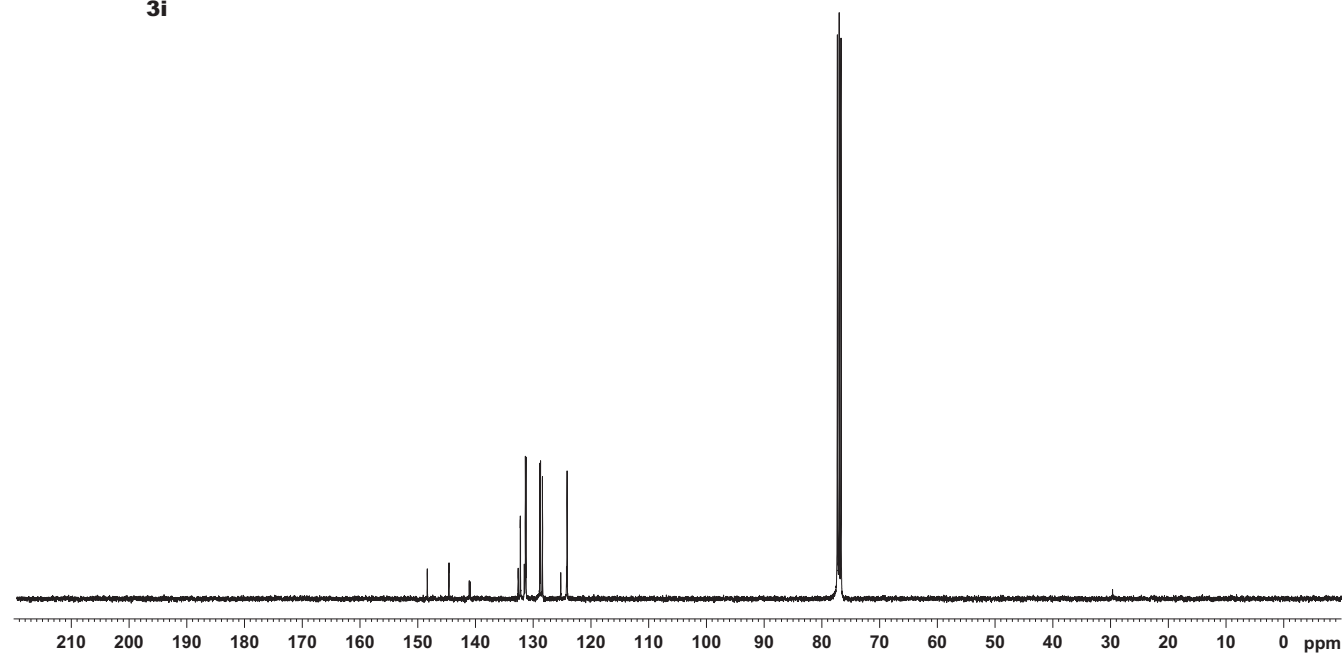



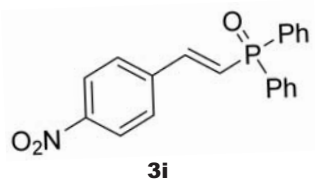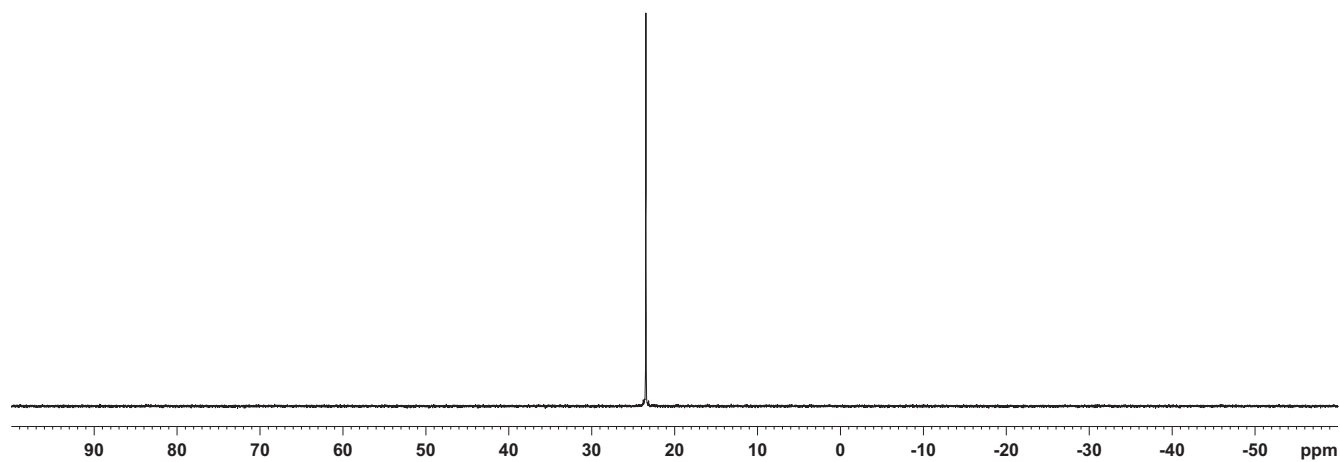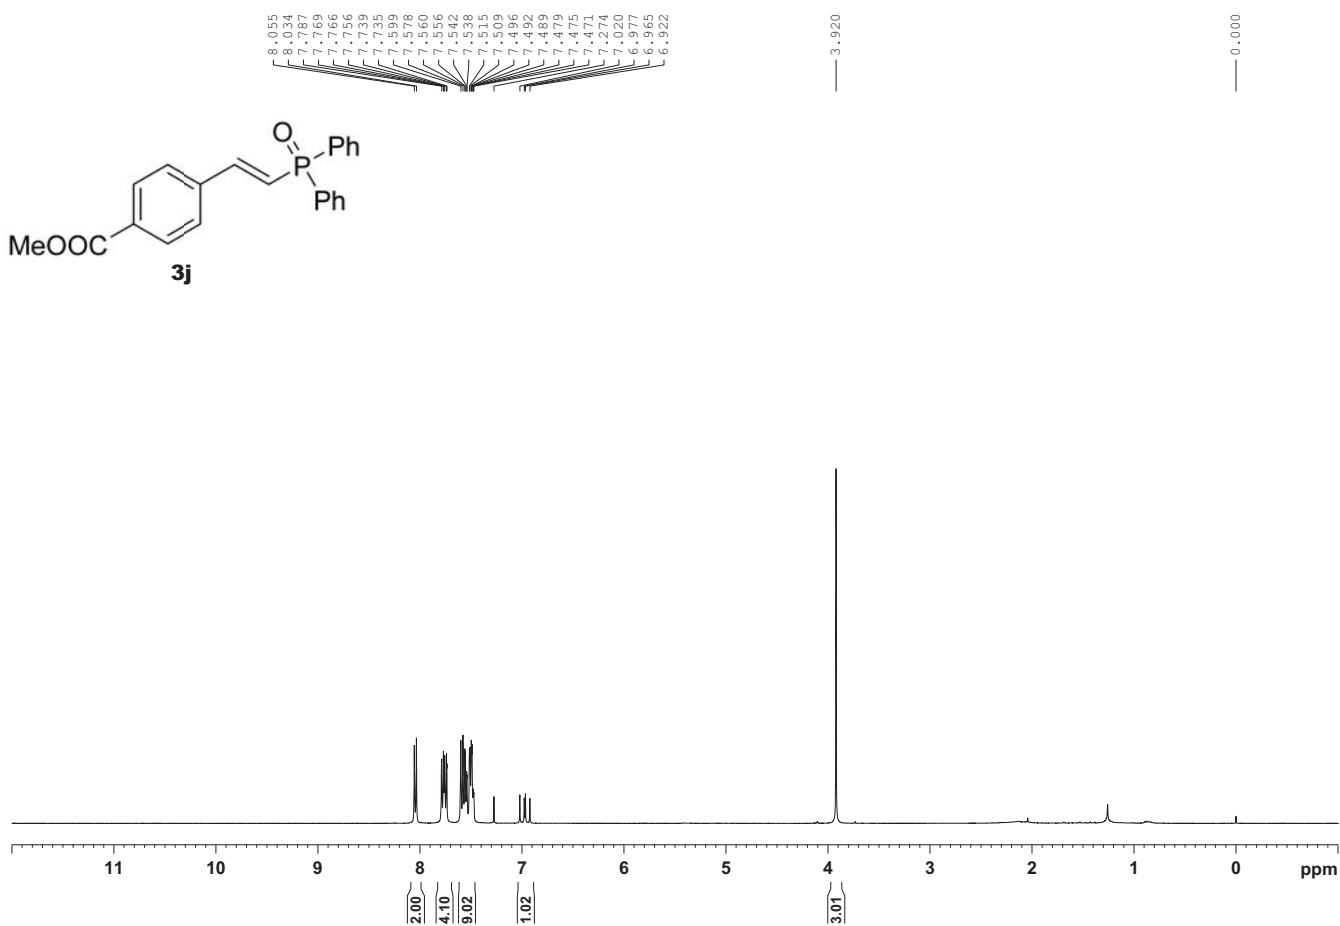

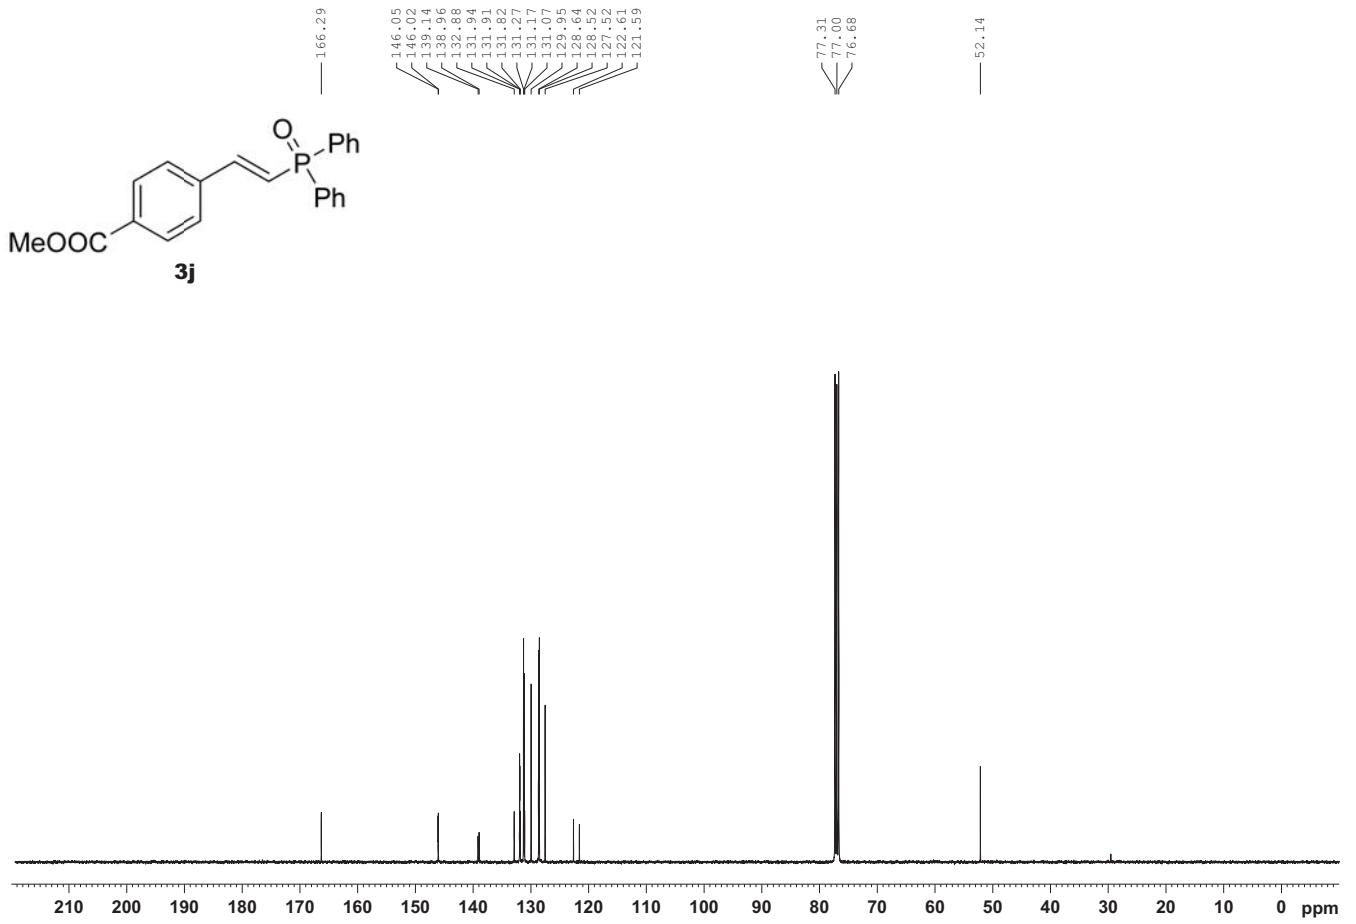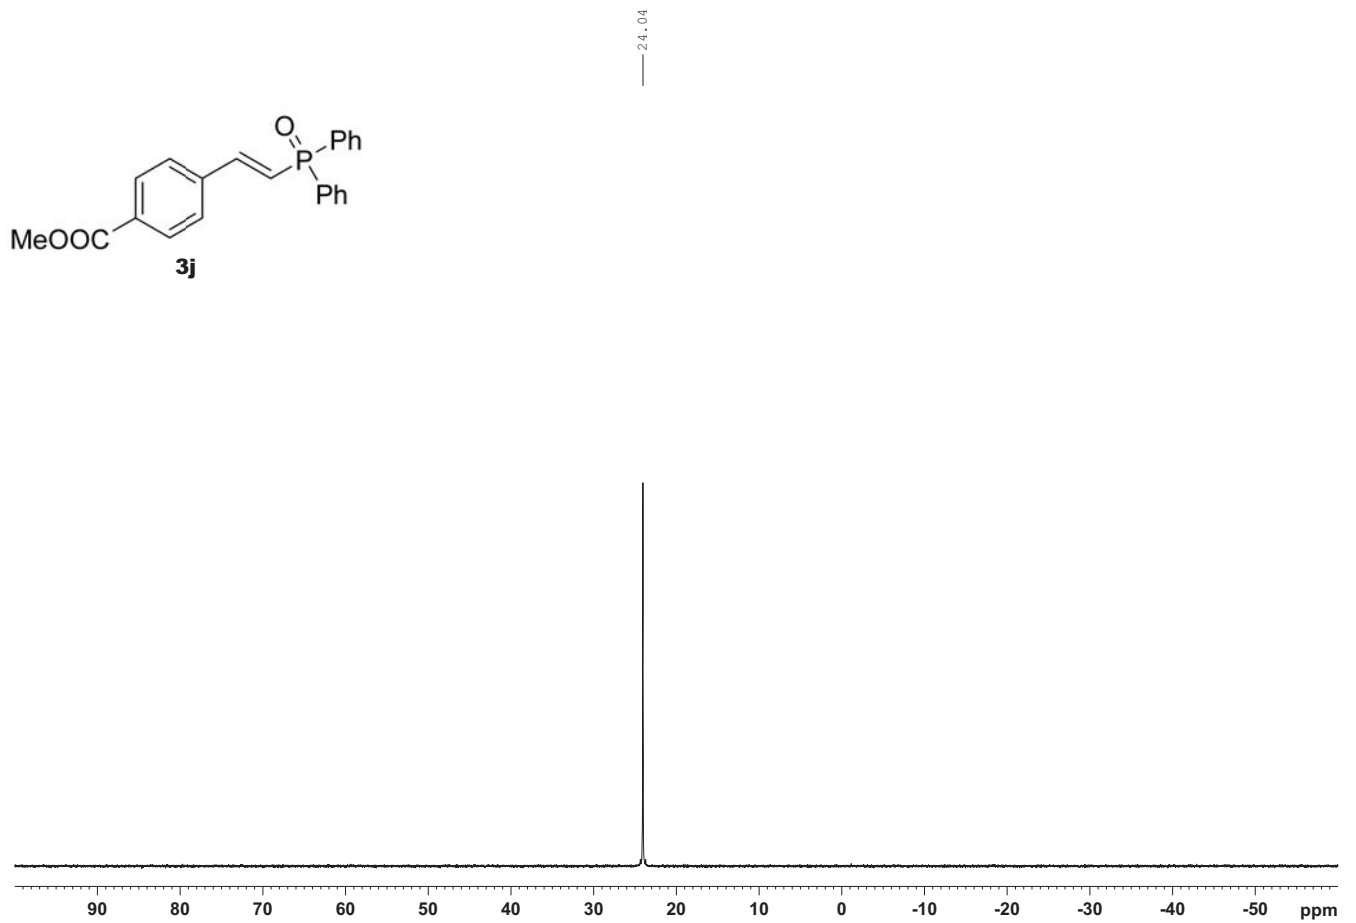

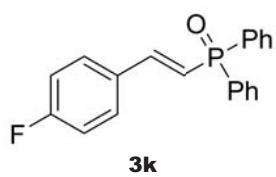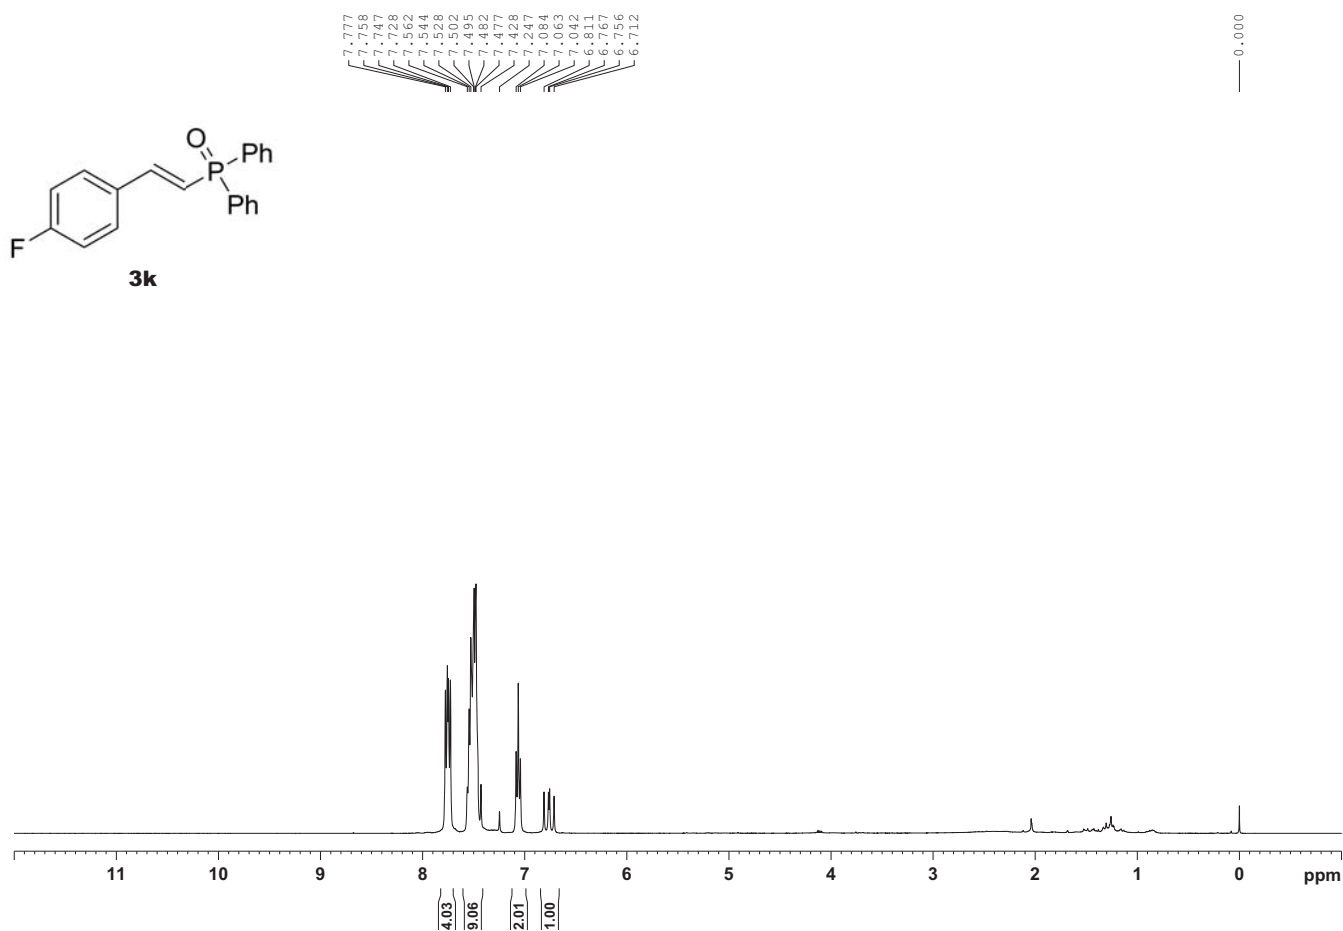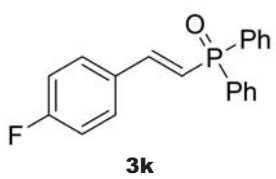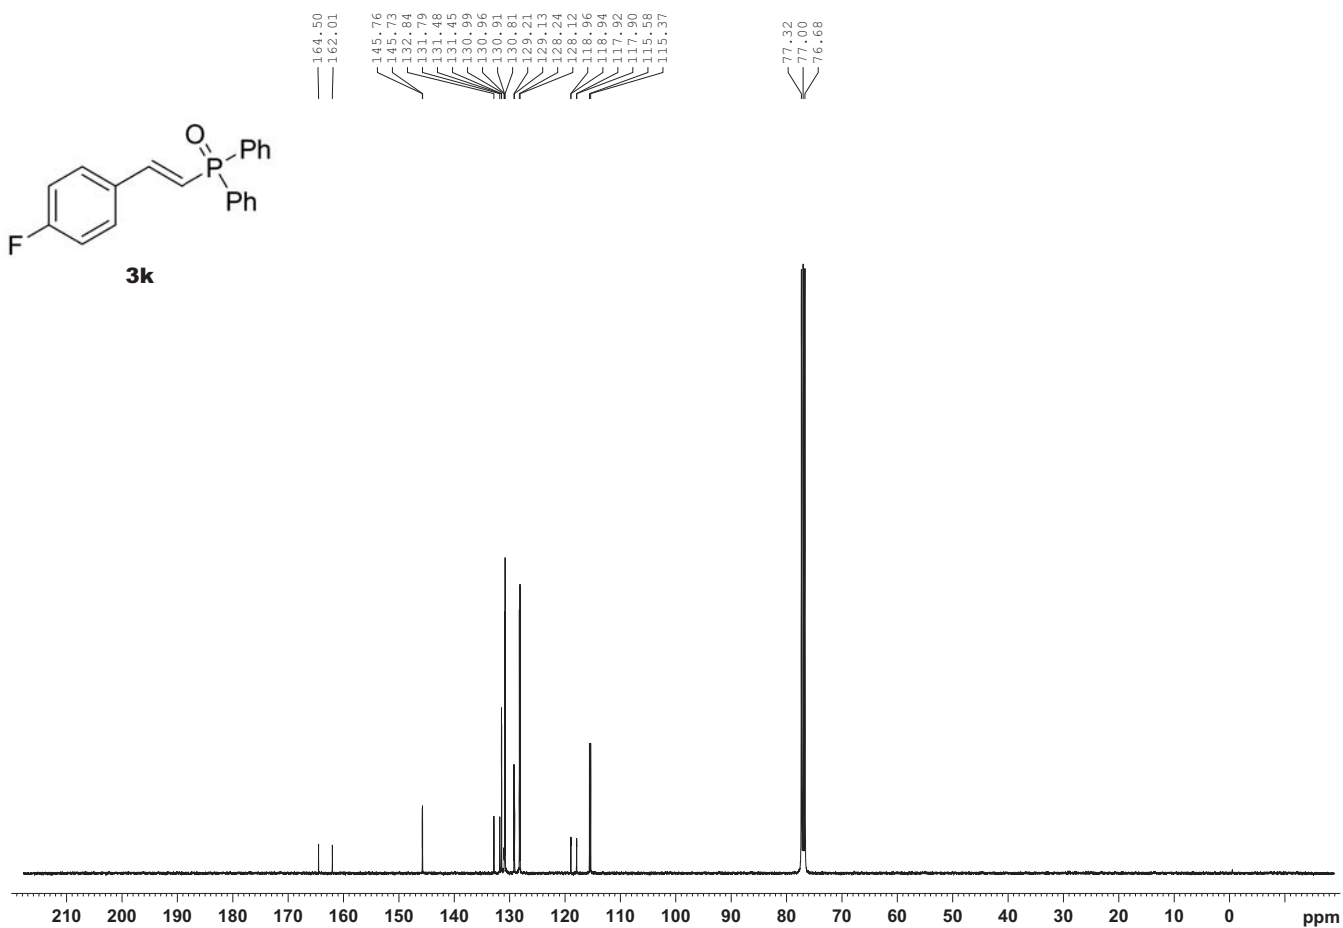

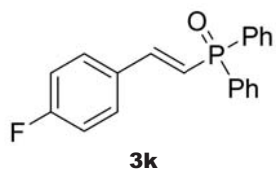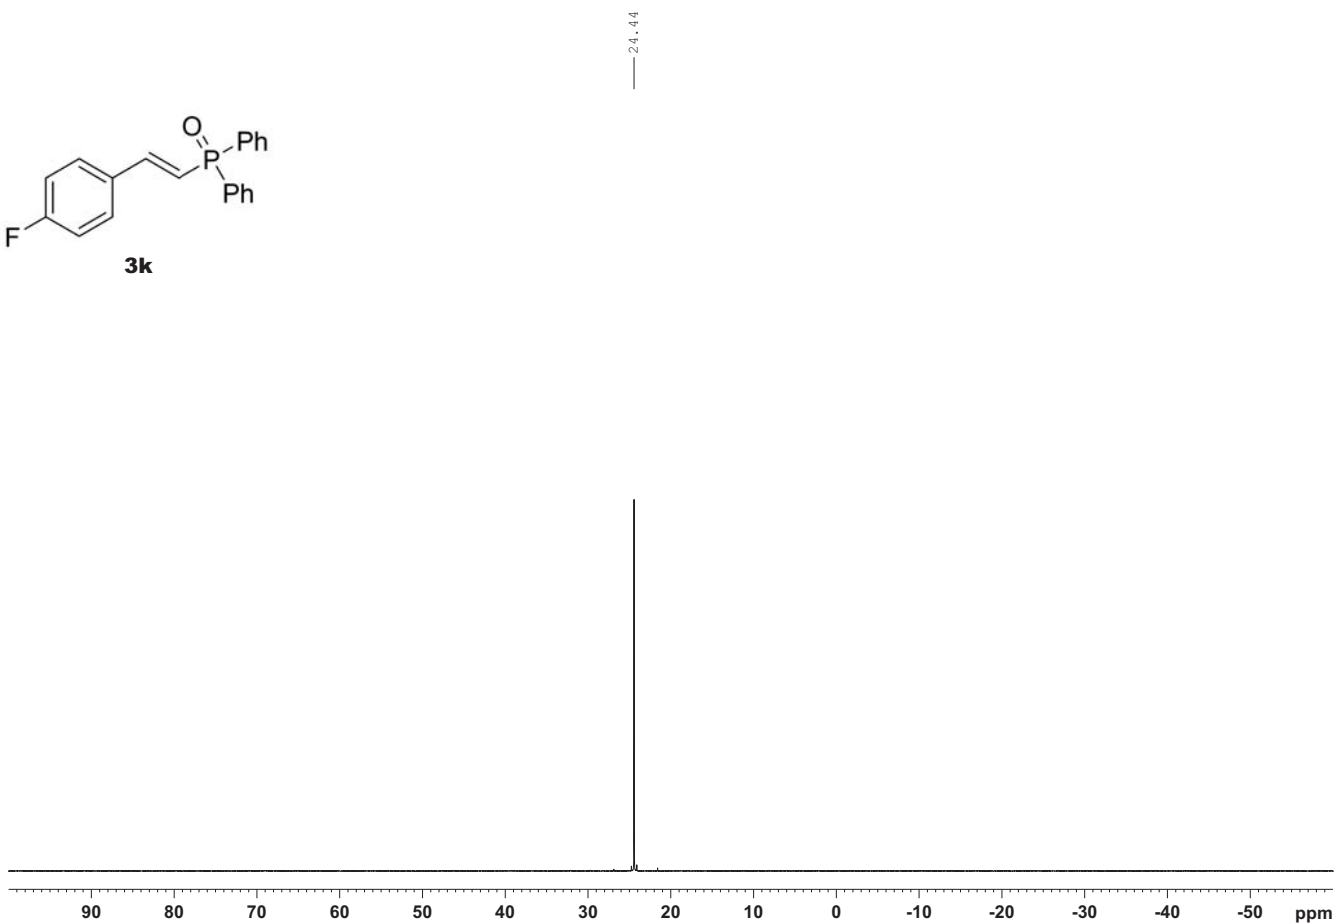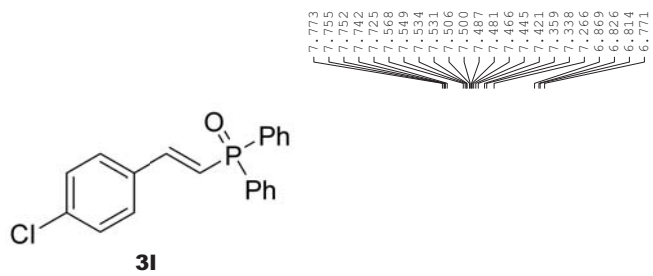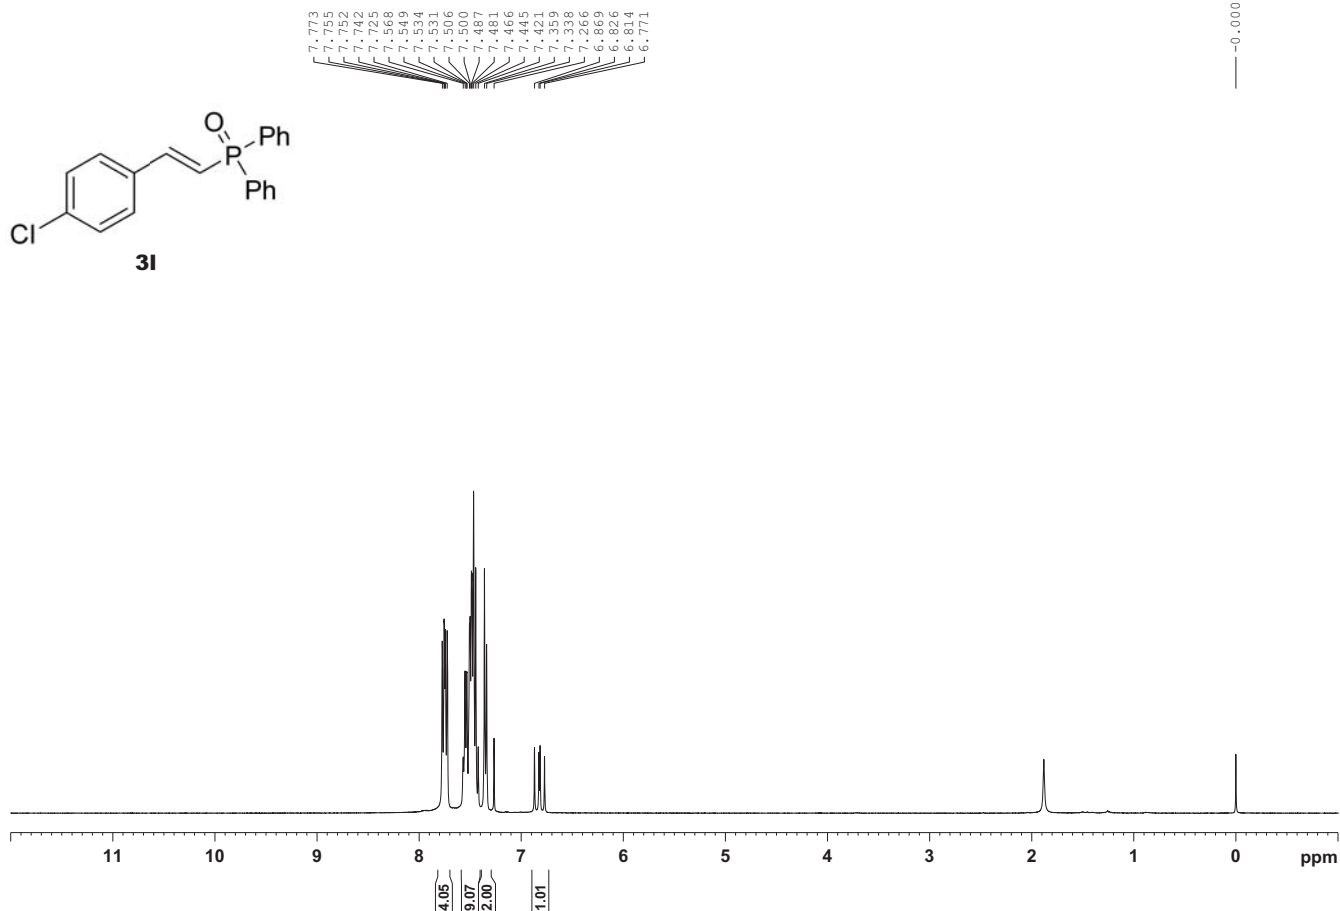

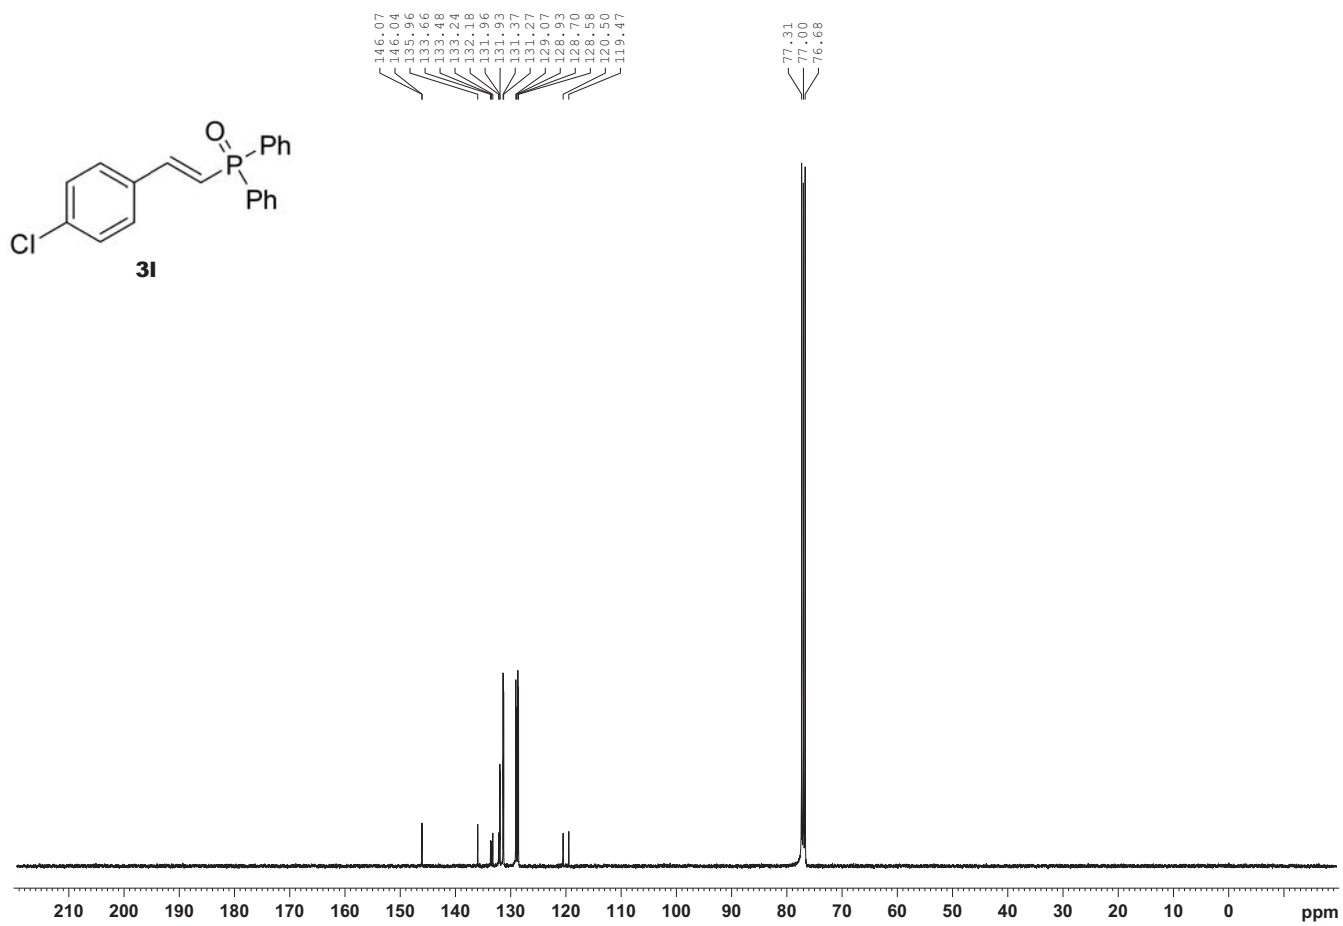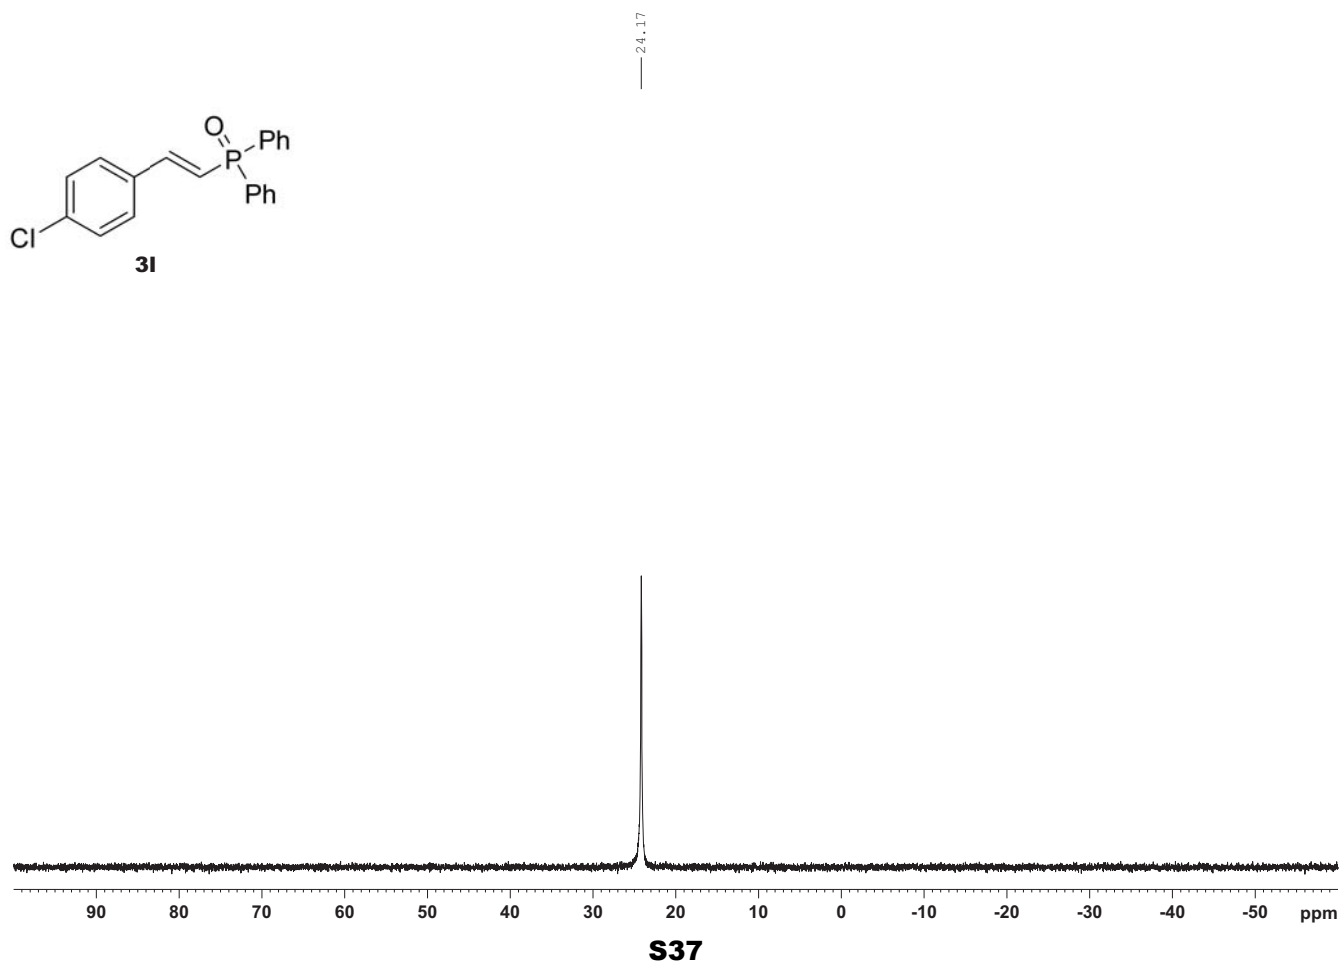

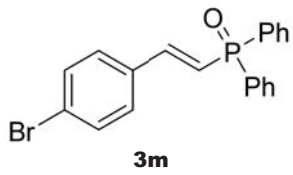

7.770  
 7.753  
 7.750  
 7.740  
 7.723  
 7.720  
 7.573  
 7.570  
 7.552  
 7.537  
 7.534  
 7.523  
 7.489  
 7.483  
 7.472  
 7.469  
 7.465  
 7.455  
 7.451  
 7.405  
 7.399  
 7.377  
 7.263  
 6.884  
 6.840  
 6.829  
 6.785

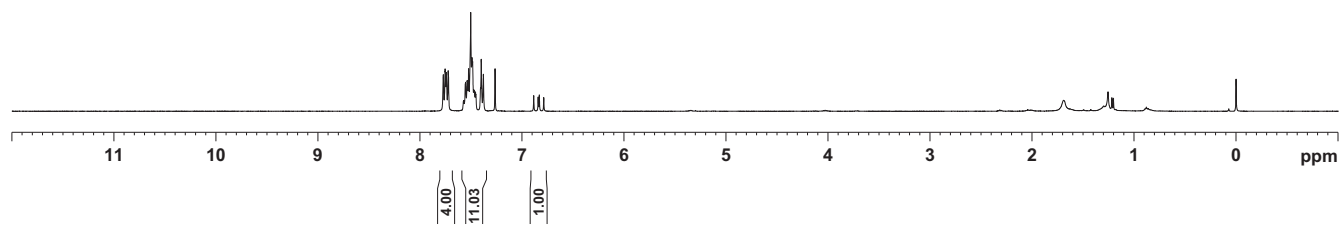

— -0.000

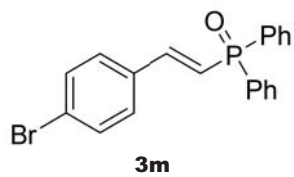

145.55  
 133.92  
 133.30  
 132.58  
 131.80  
 131.52  
 131.47  
 131.40  
 131.37  
 130.79  
 130.69  
 128.59  
 128.14  
 128.02  
 123.72  
 120.06  
 119.03

77.32  
 77.00  
 76.68

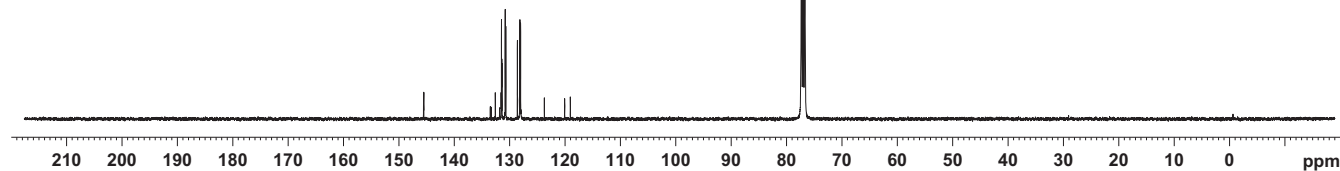

**S38**

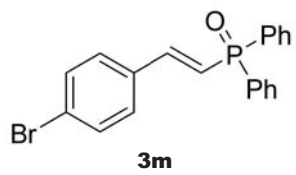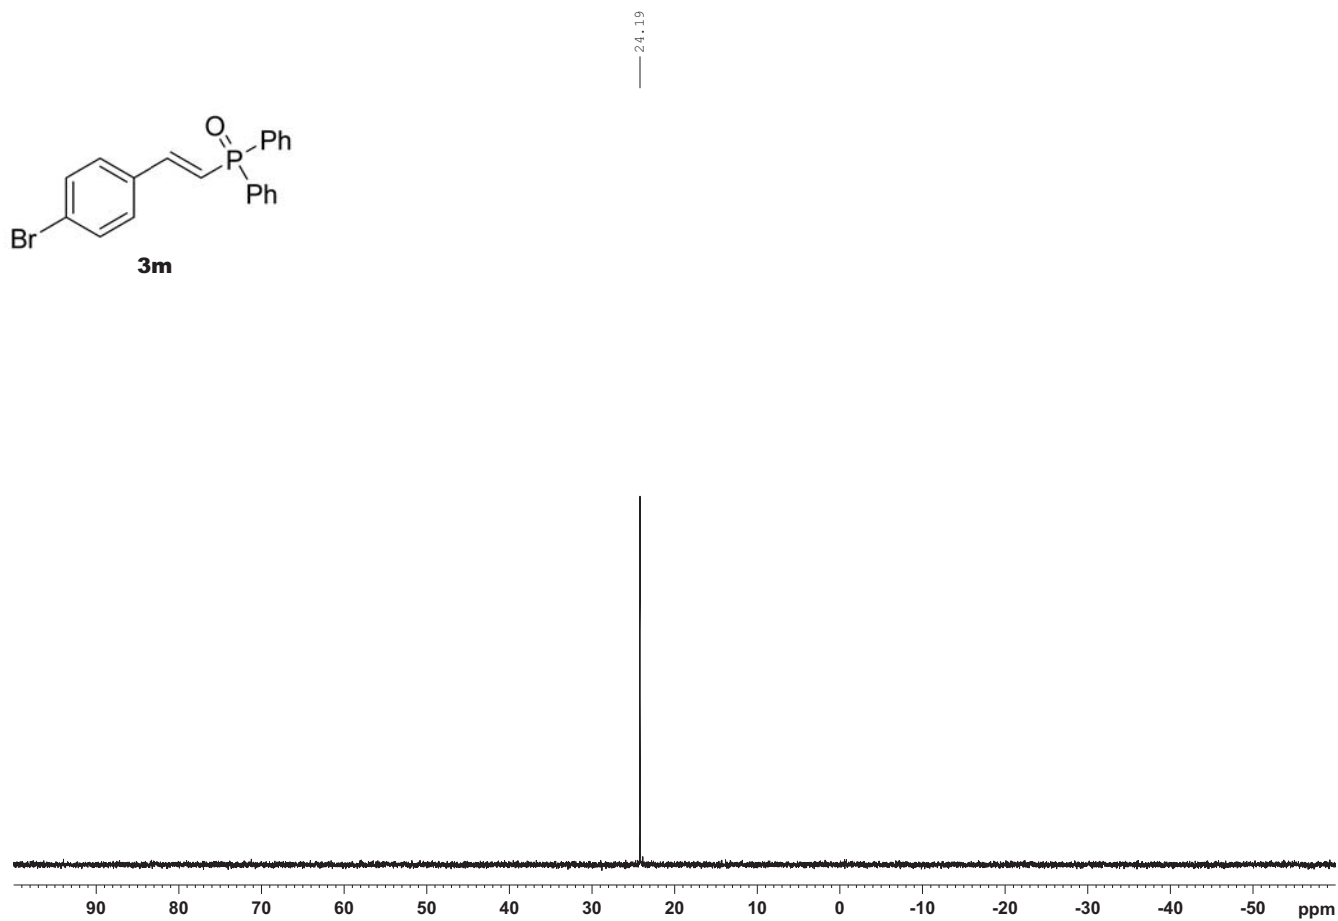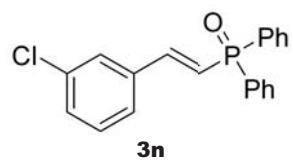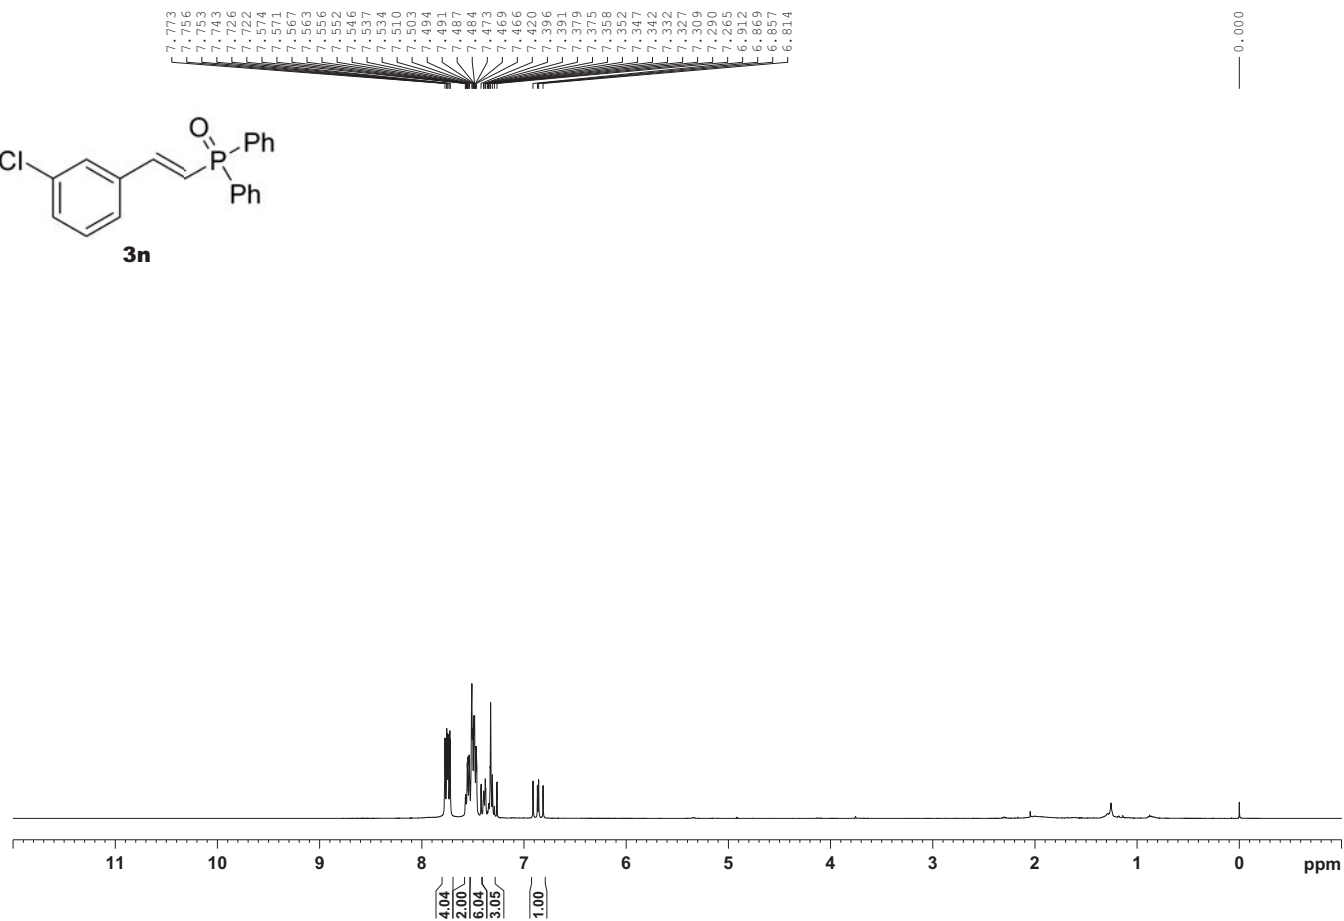

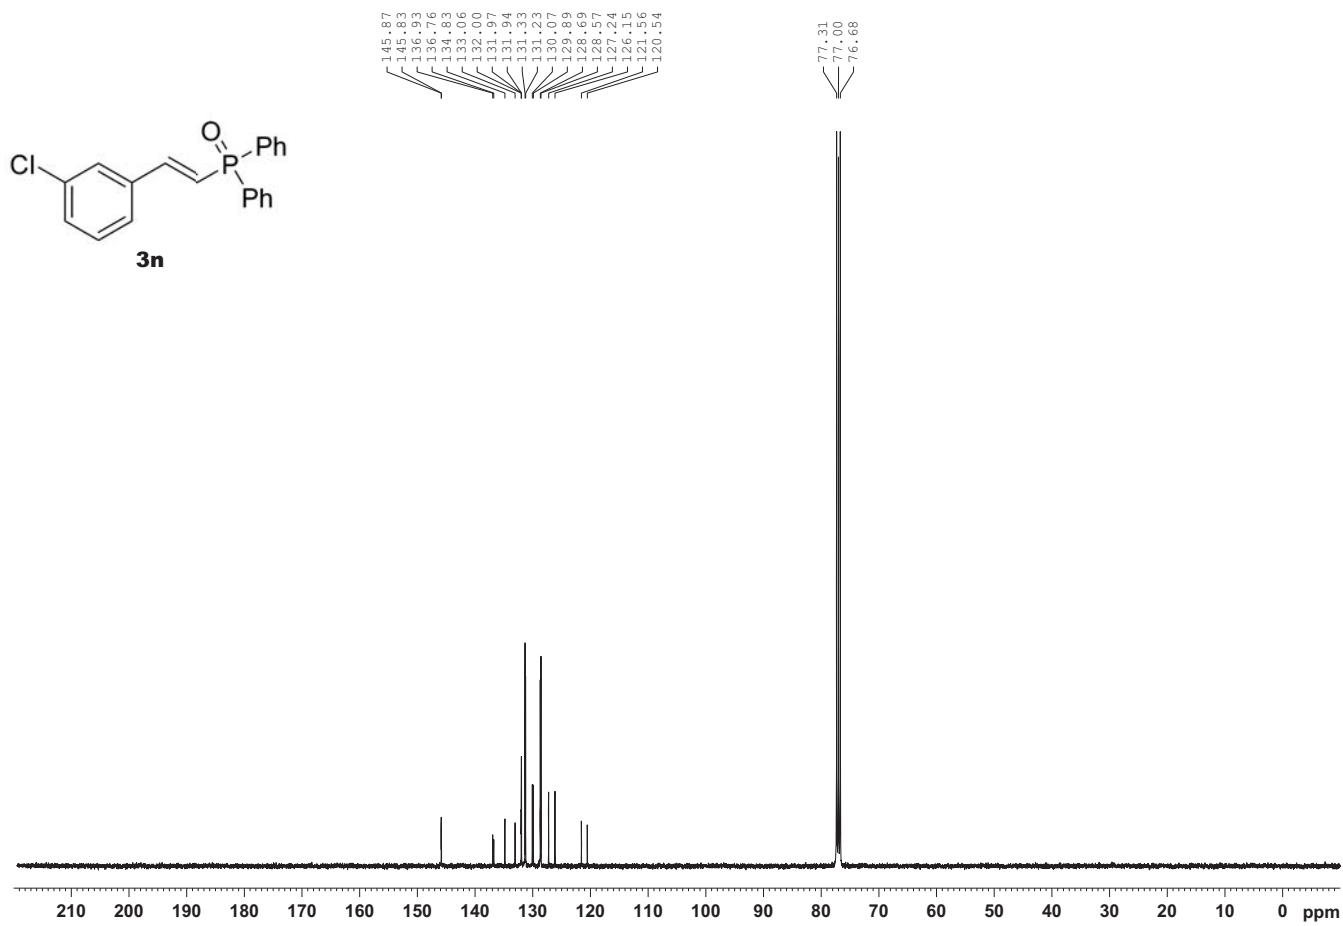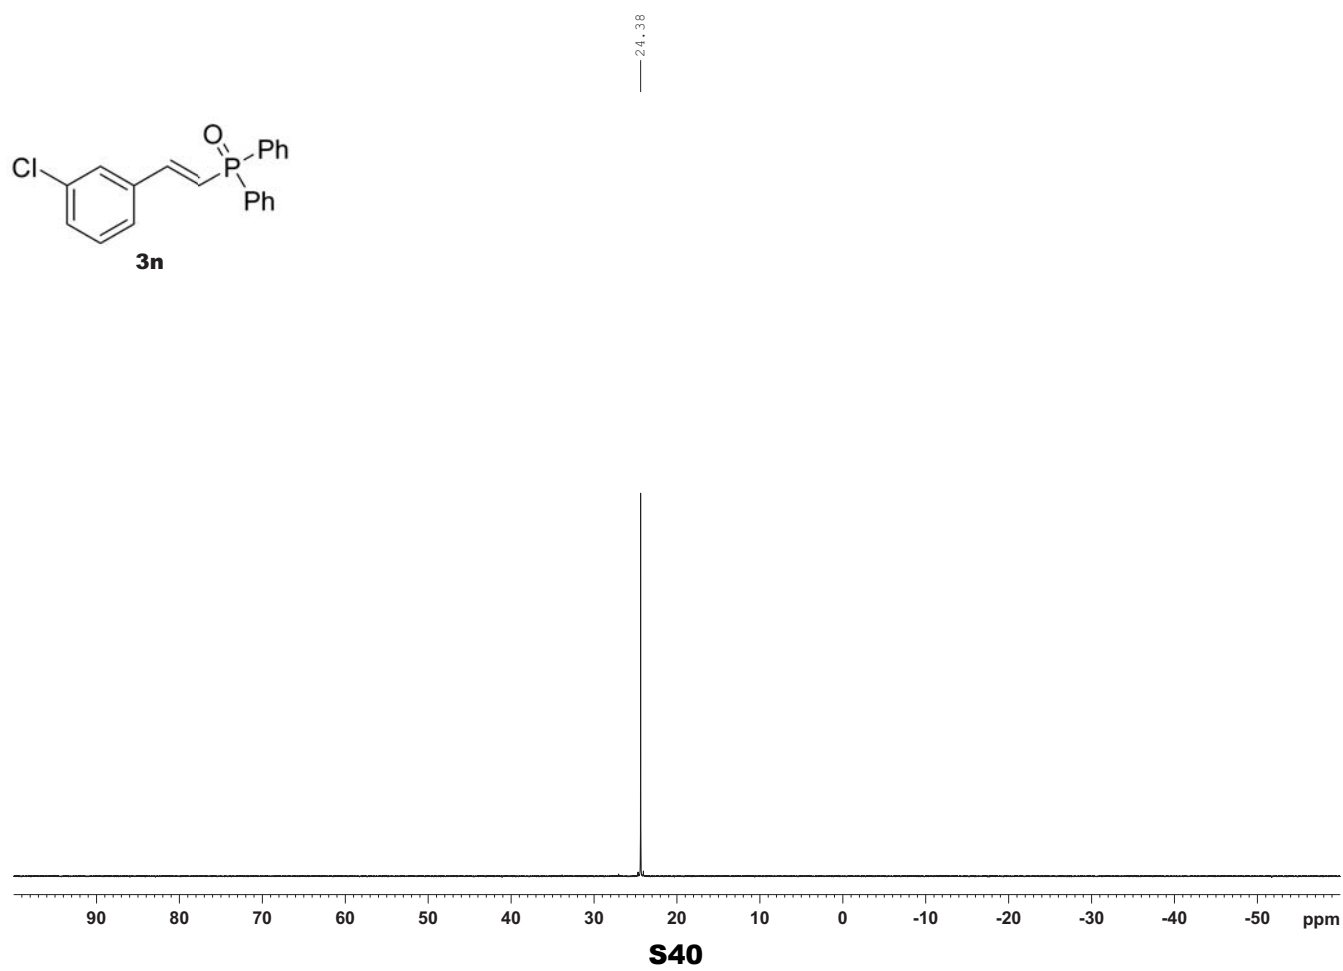



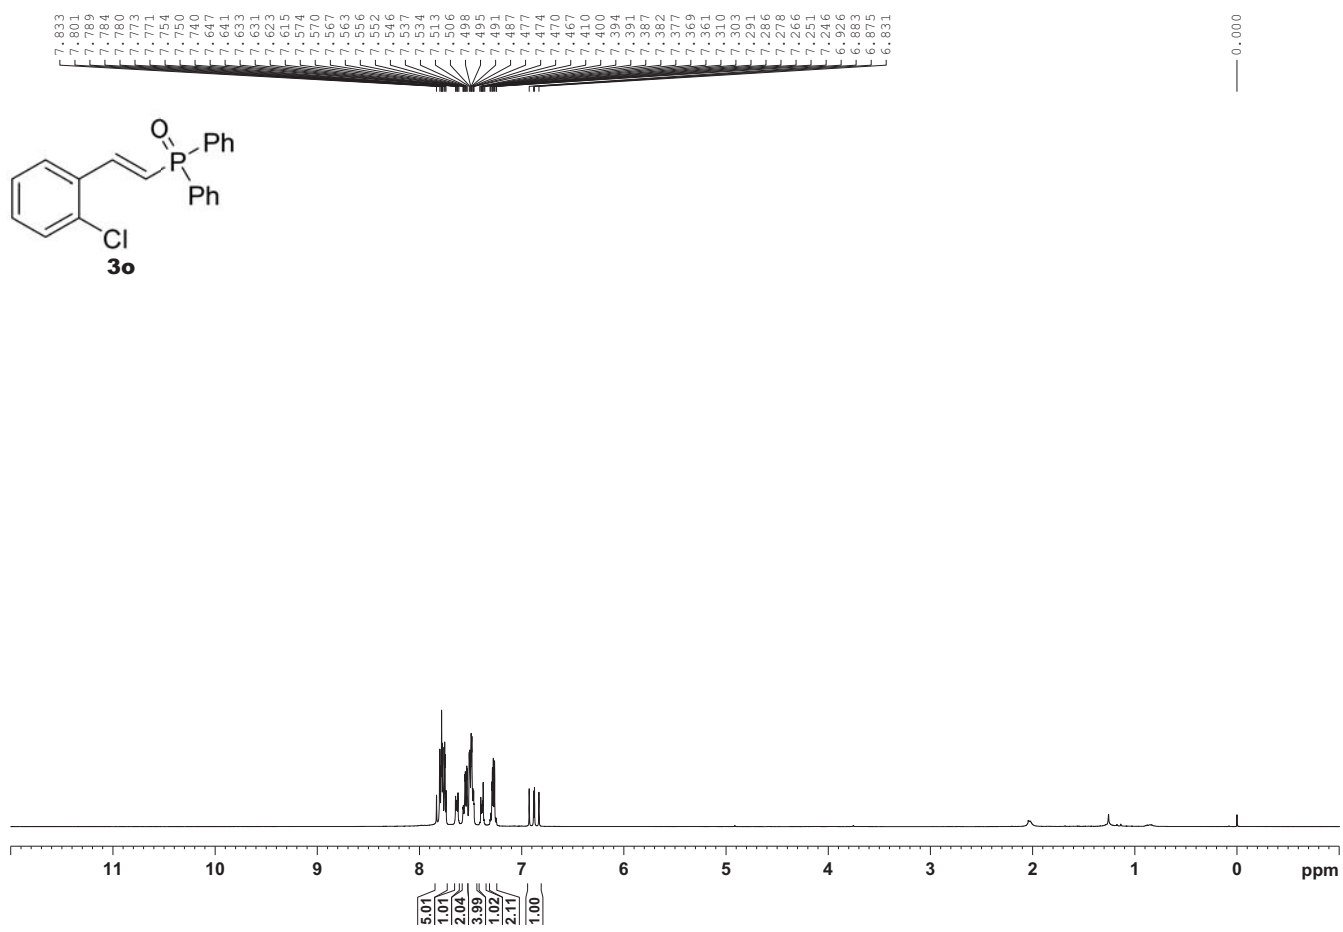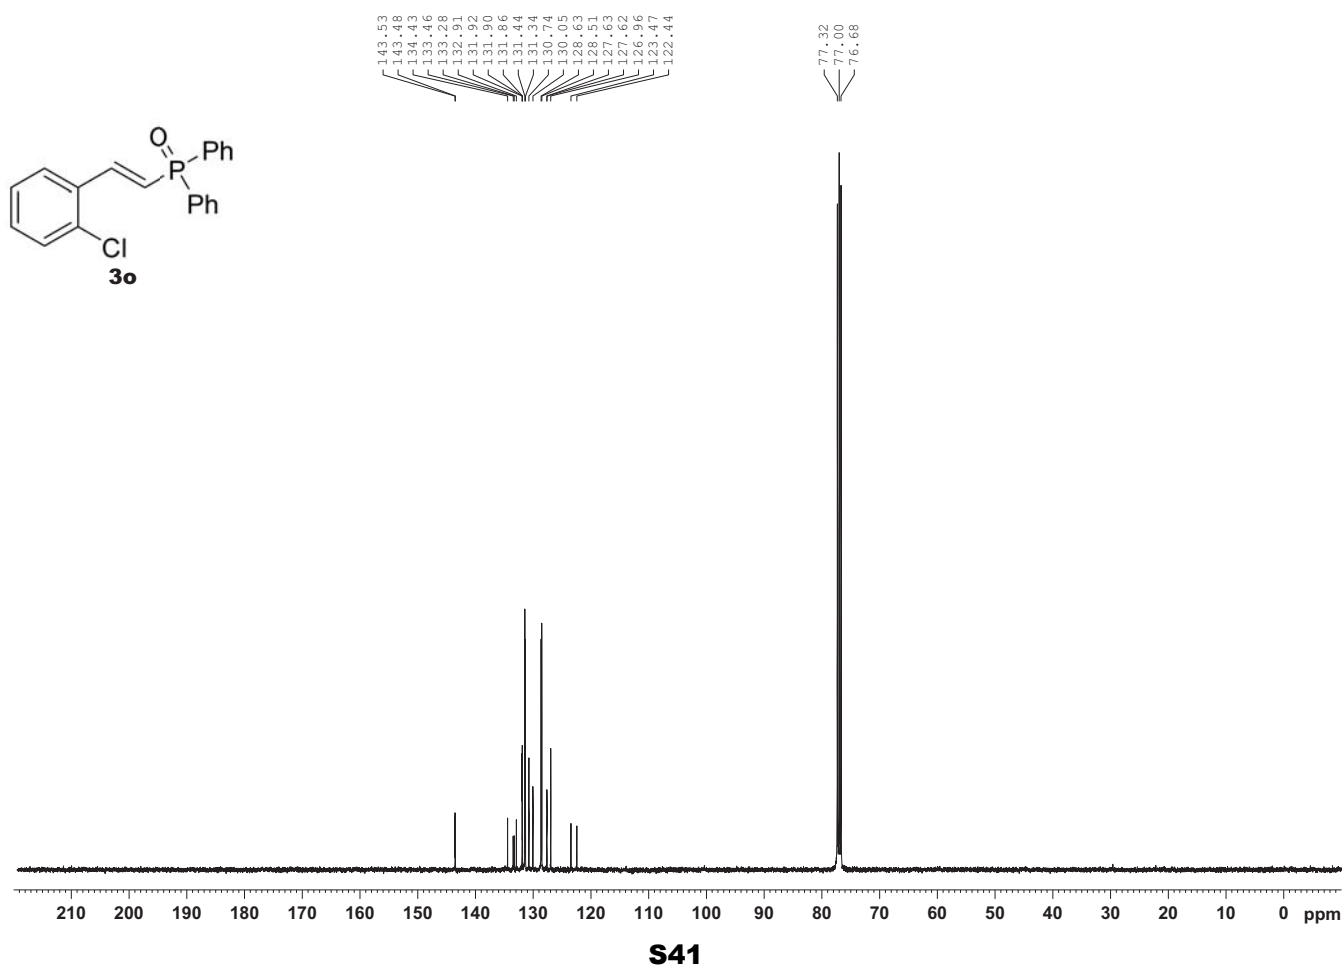

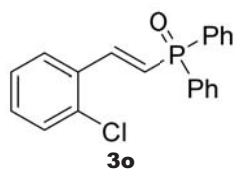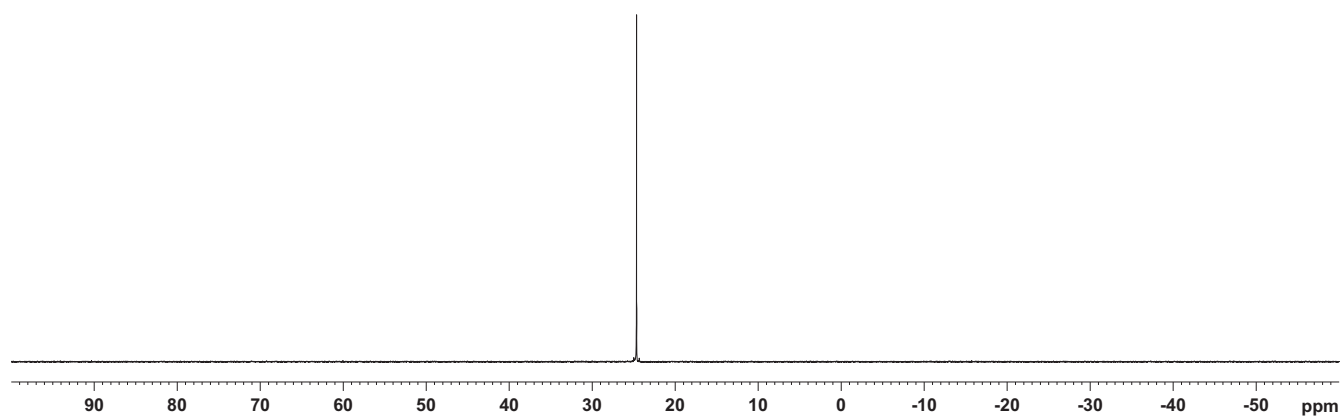

7.768  
7.750  
7.739  
7.722  
7.699  
7.697  
7.637  
7.490  
7.440  
7.420  
7.265  
7.248  
7.230  
7.186  
6.901  
6.850  
6.804

0.000

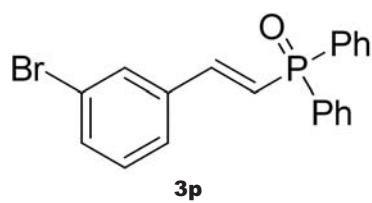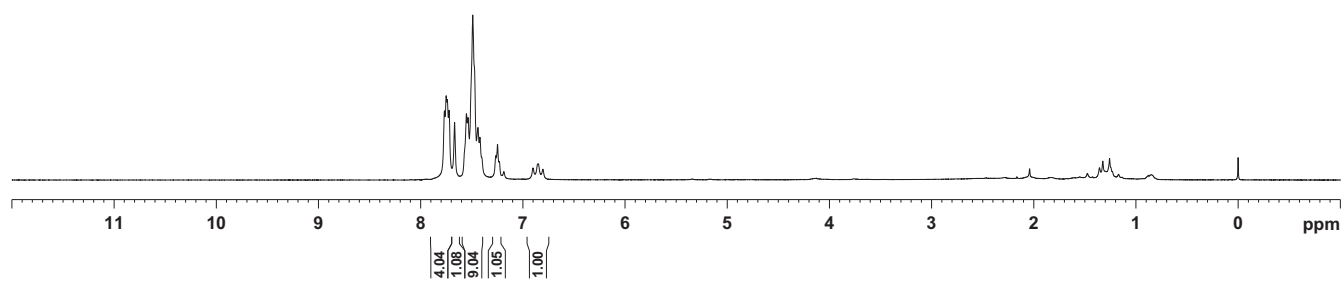

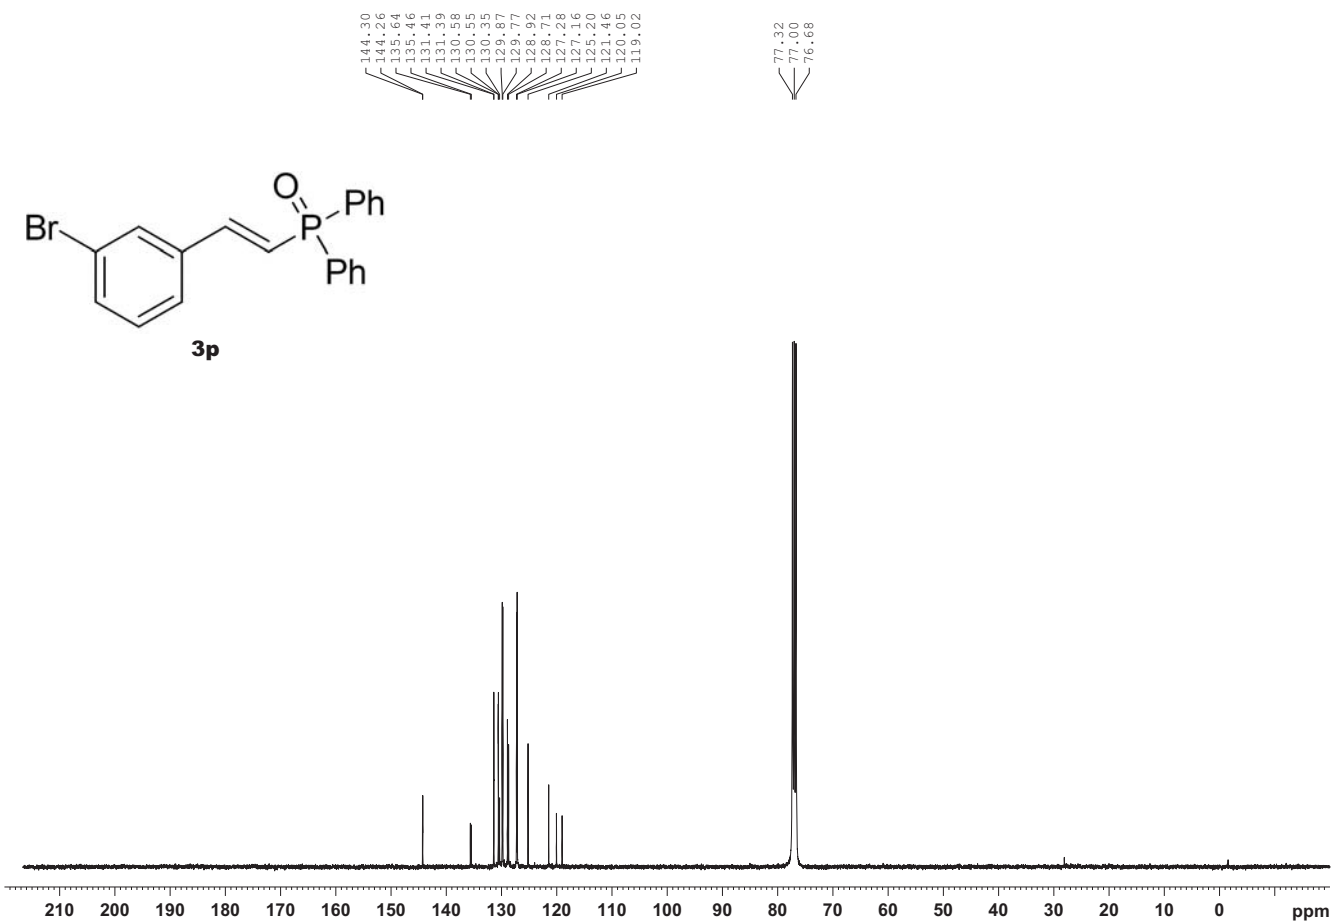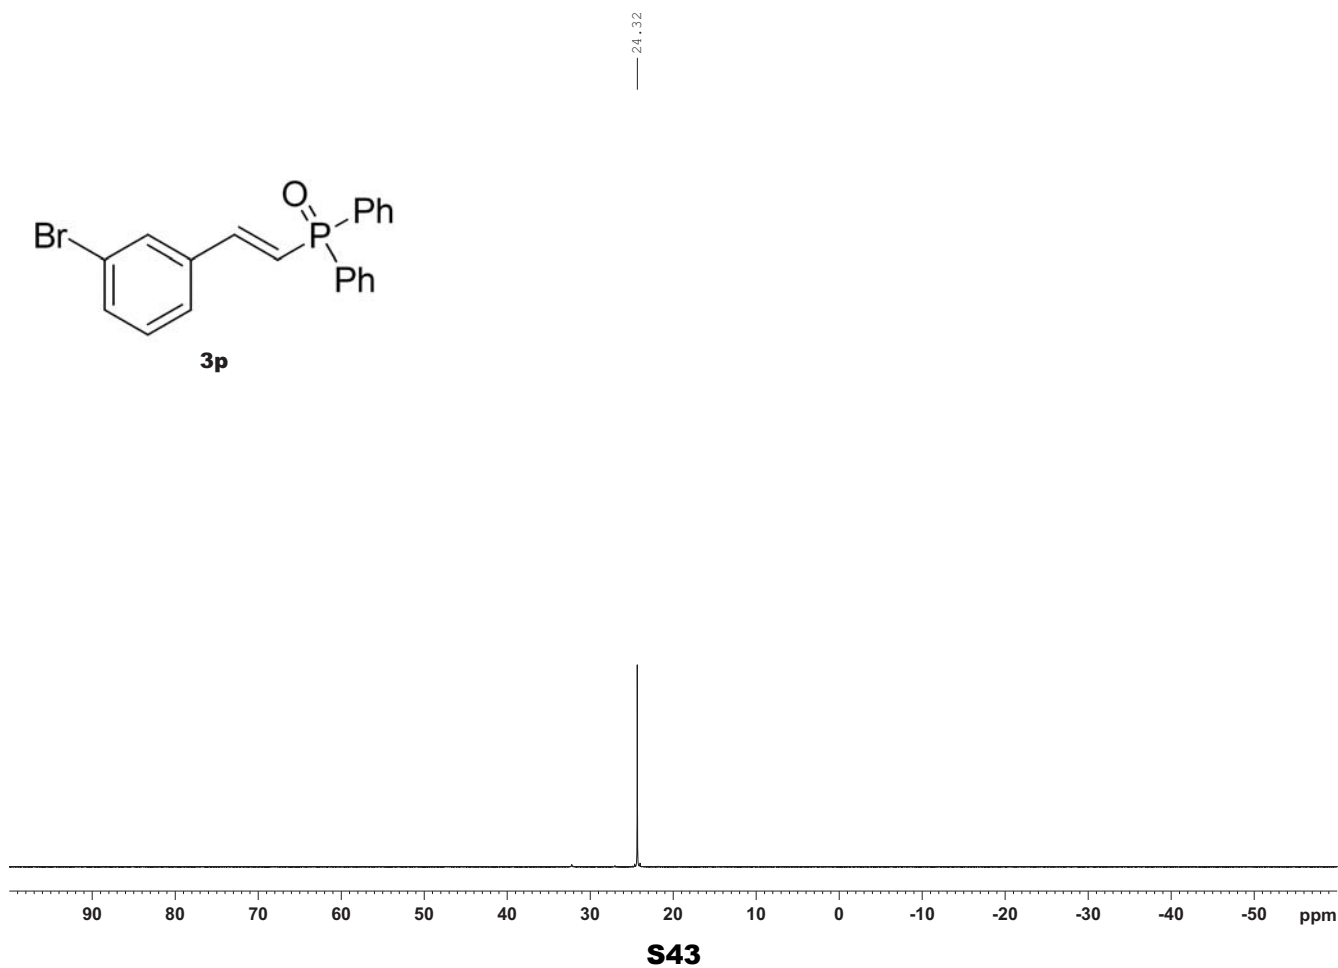

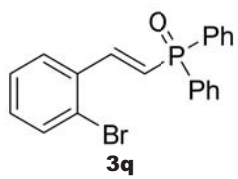

7.805  
 7.786  
 7.775  
 7.757  
 7.736  
 7.692  
 7.687  
 7.643  
 7.624  
 7.604  
 7.582  
 7.562  
 7.550  
 7.533  
 7.510  
 7.504  
 7.481  
 7.475  
 7.475  
 7.330  
 7.312  
 7.293  
 7.255  
 7.215  
 7.196  
 7.177  
 6.870  
 6.826  
 6.820  
 6.776

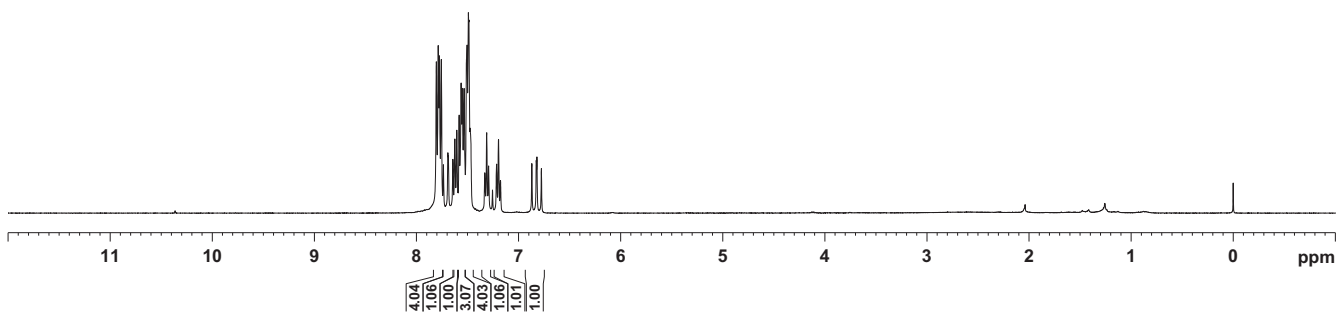

0.000

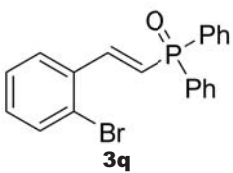

145.86  
 145.80  
 134.93  
 134.75  
 132.95  
 132.41  
 131.65  
 131.63  
 131.36  
 131.17  
 131.07  
 130.64  
 128.34  
 128.22  
 127.45  
 127.32  
 124.42  
 123.36  
 122.34

77.32  
 77.00  
 76.68

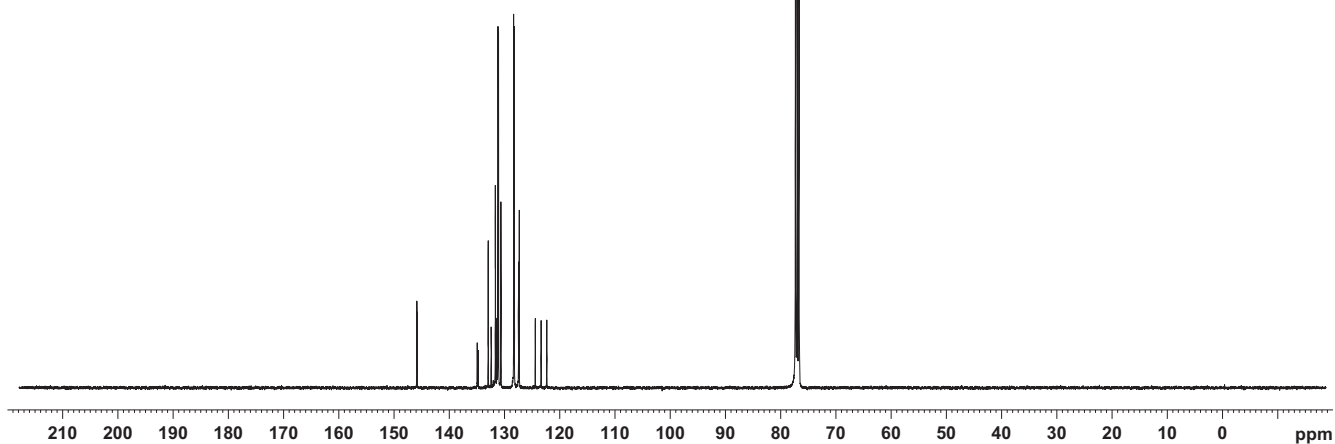

S44

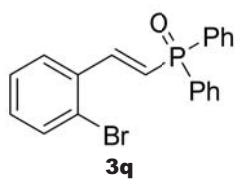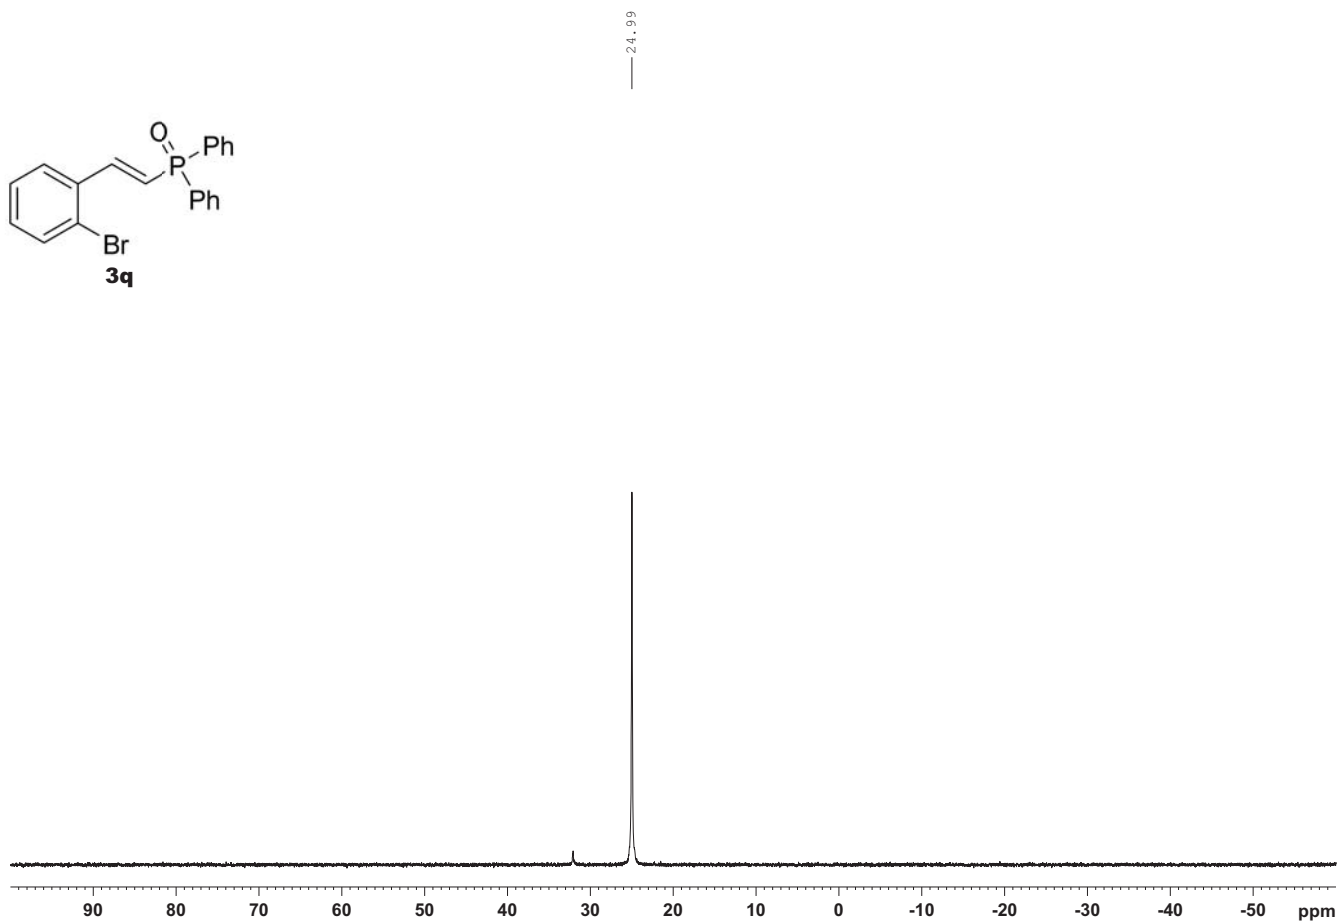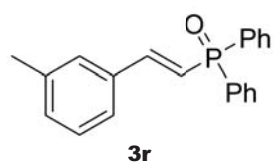

7.780  
7.761  
7.750  
7.732  
7.560  
7.542  
7.525  
7.513  
7.495  
7.482  
7.420  
7.358  
7.328  
7.268  
7.250  
7.225  
7.193  
7.175  
6.869  
6.826  
6.813  
6.770

2.360

-0.000

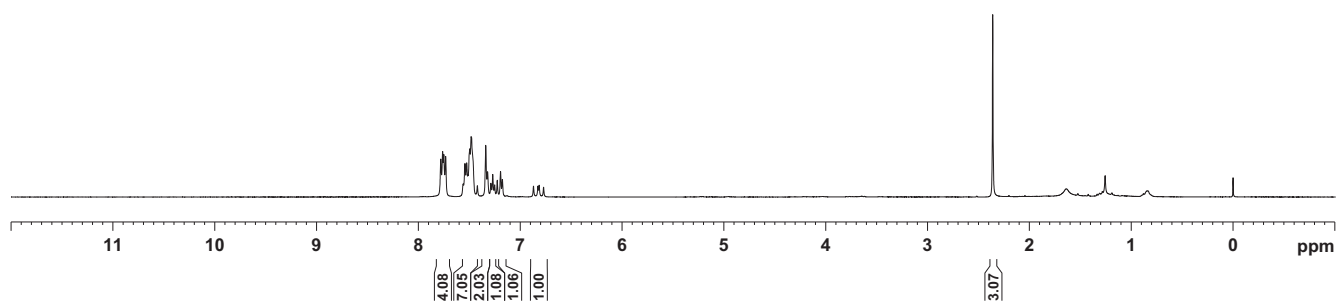

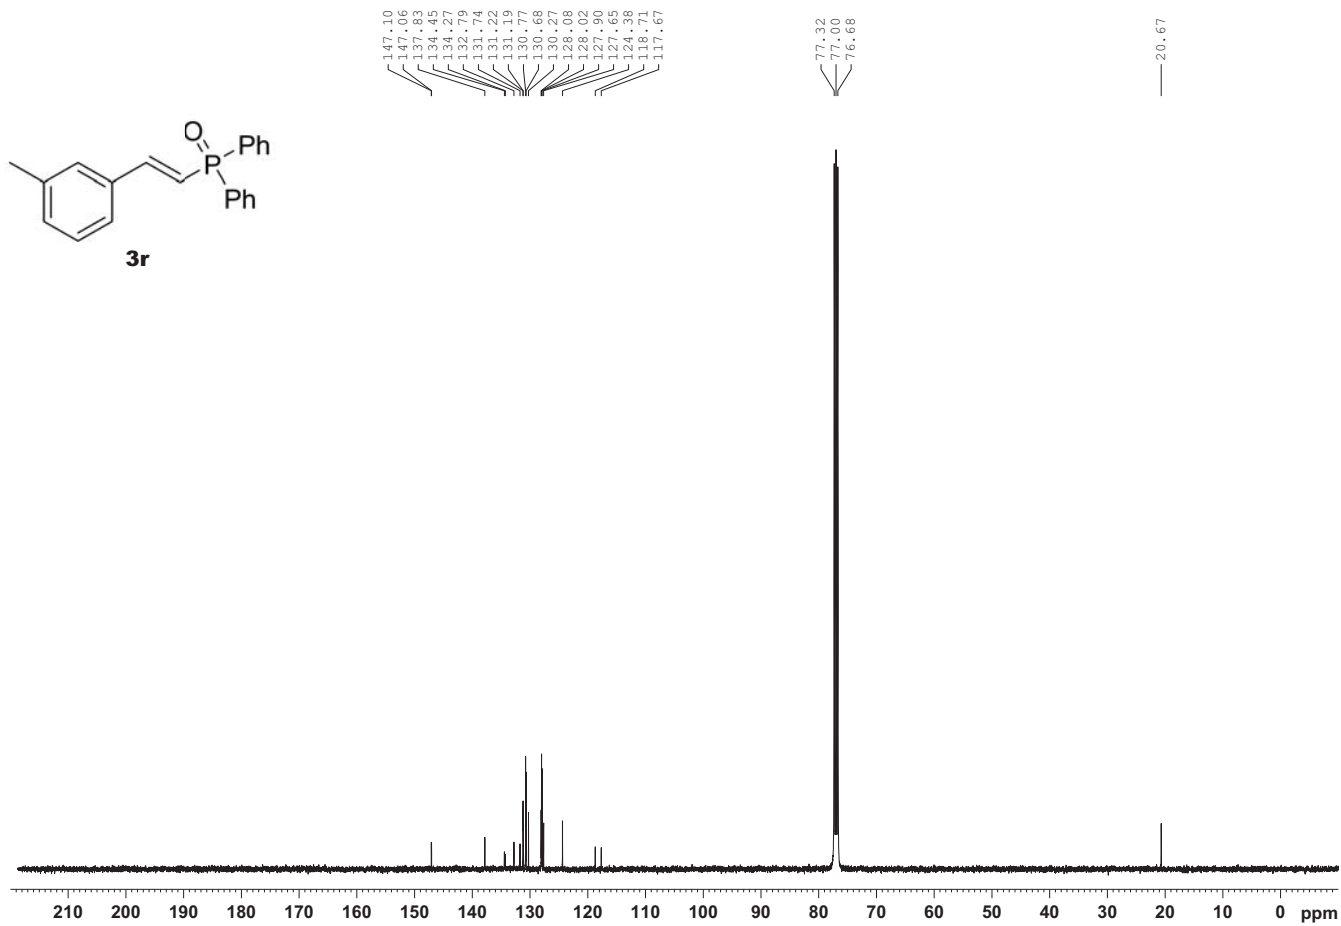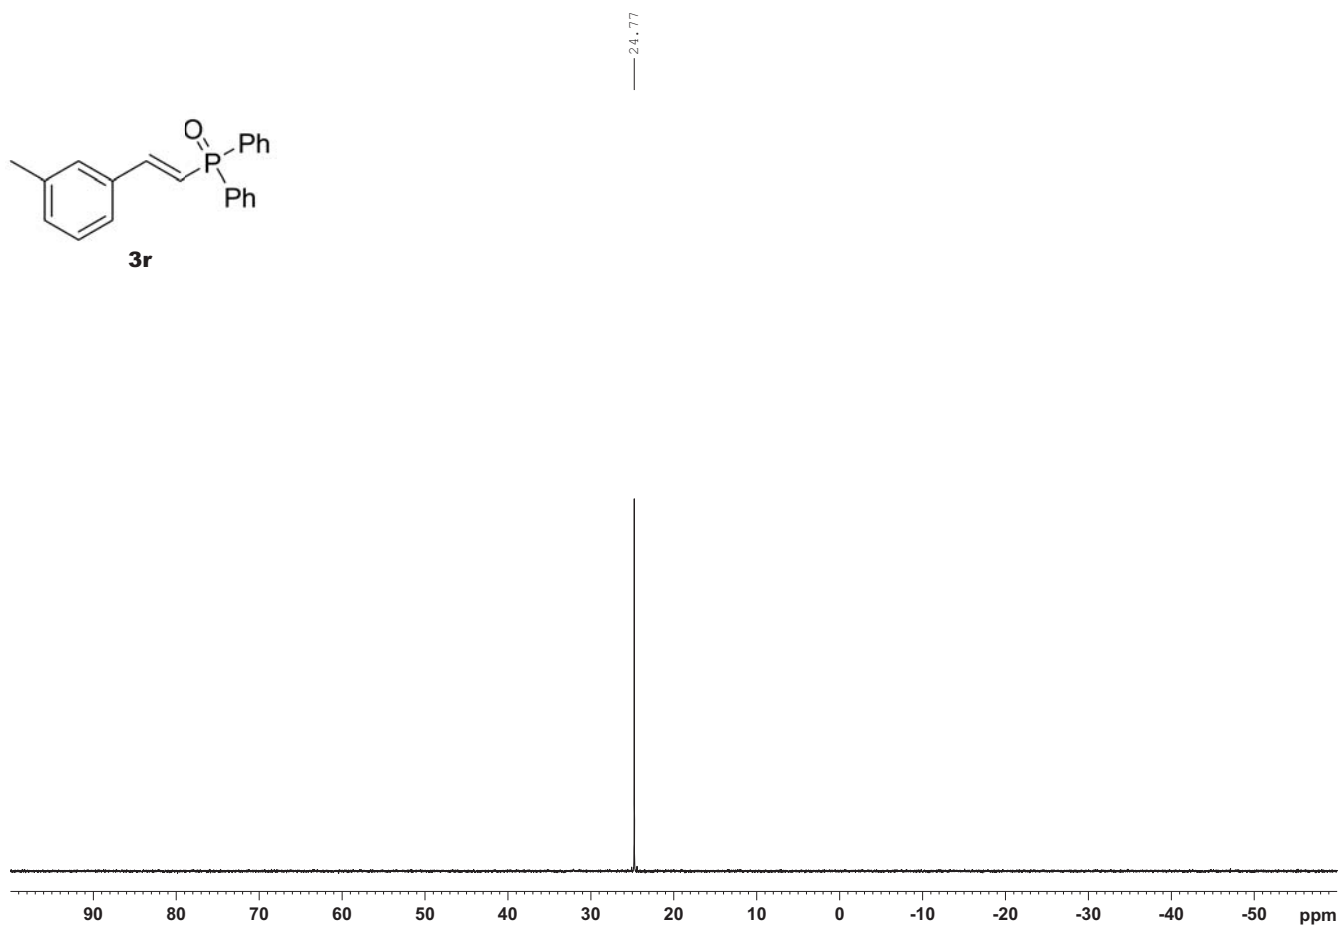

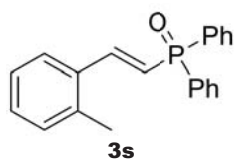

7.788  
 7.764  
 7.743  
 7.718  
 7.592  
 7.573  
 7.544  
 7.529  
 7.485  
 7.261  
 7.228  
 7.198  
 6.823  
 6.779  
 6.766  
 6.722

2.374

0.000

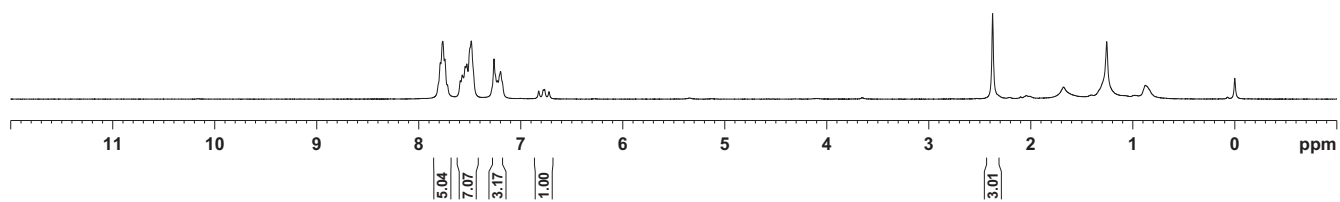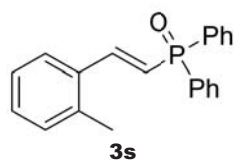

141.62  
 137.59  
 133.29  
 130.29  
 130.11  
 129.40  
 128.35  
 128.22  
 128.20  
 127.59  
 127.49  
 126.99  
 126.11  
 124.98  
 124.86  
 122.52  
 122.35  
 116.97  
 115.94

77.32  
 77.00  
 76.69

15.94

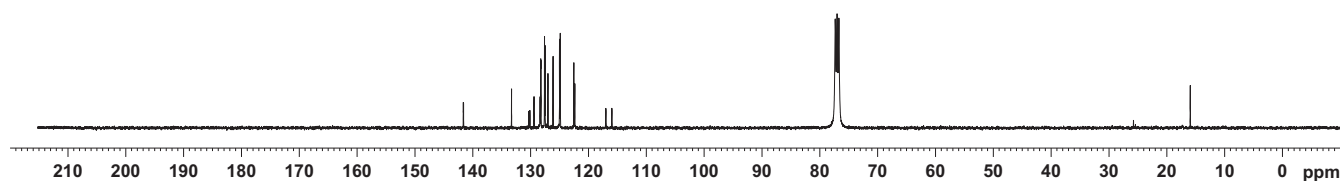

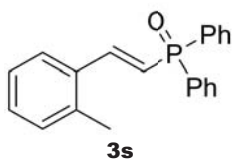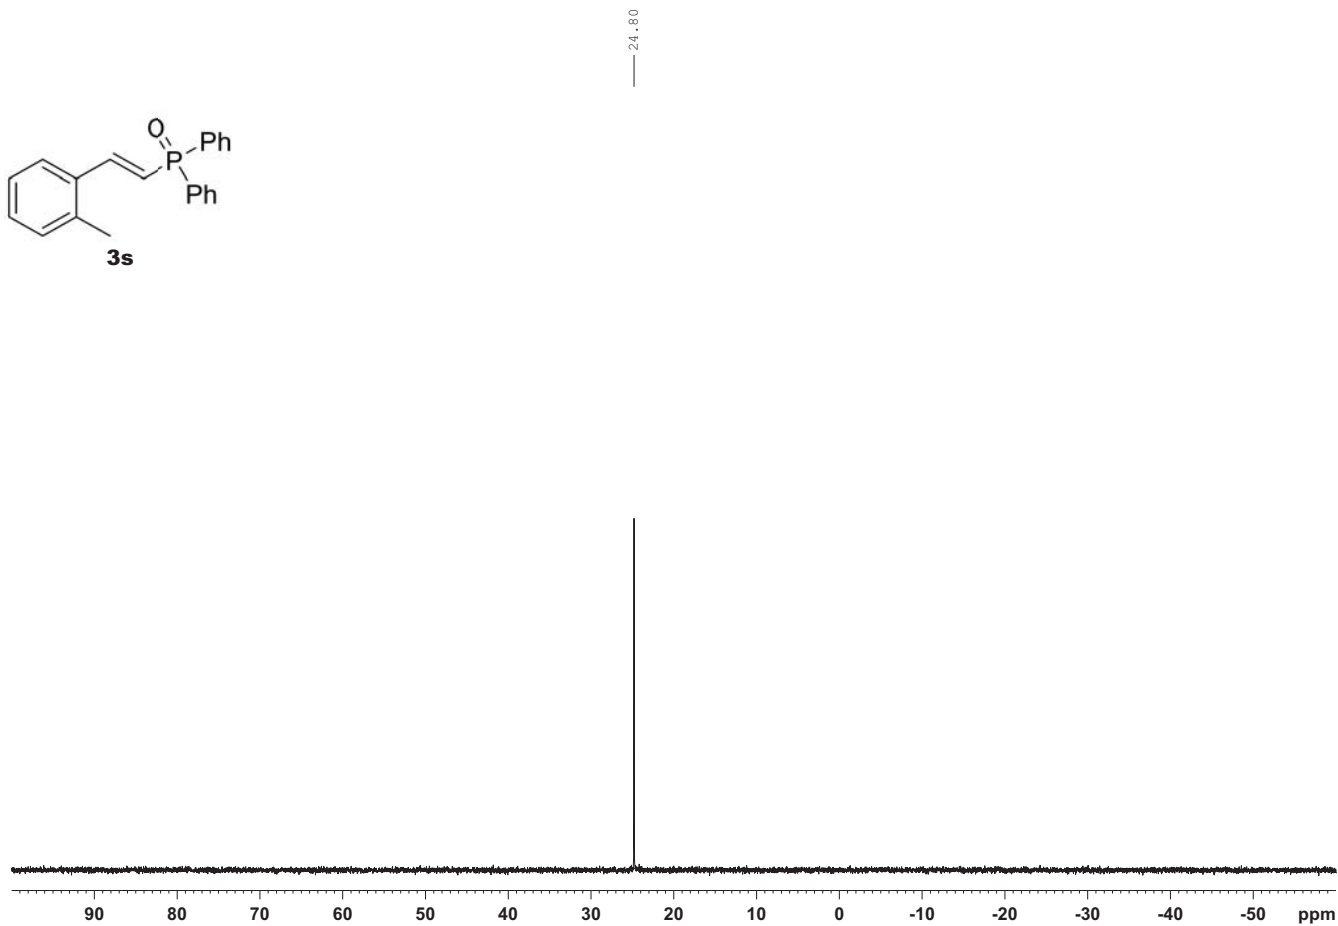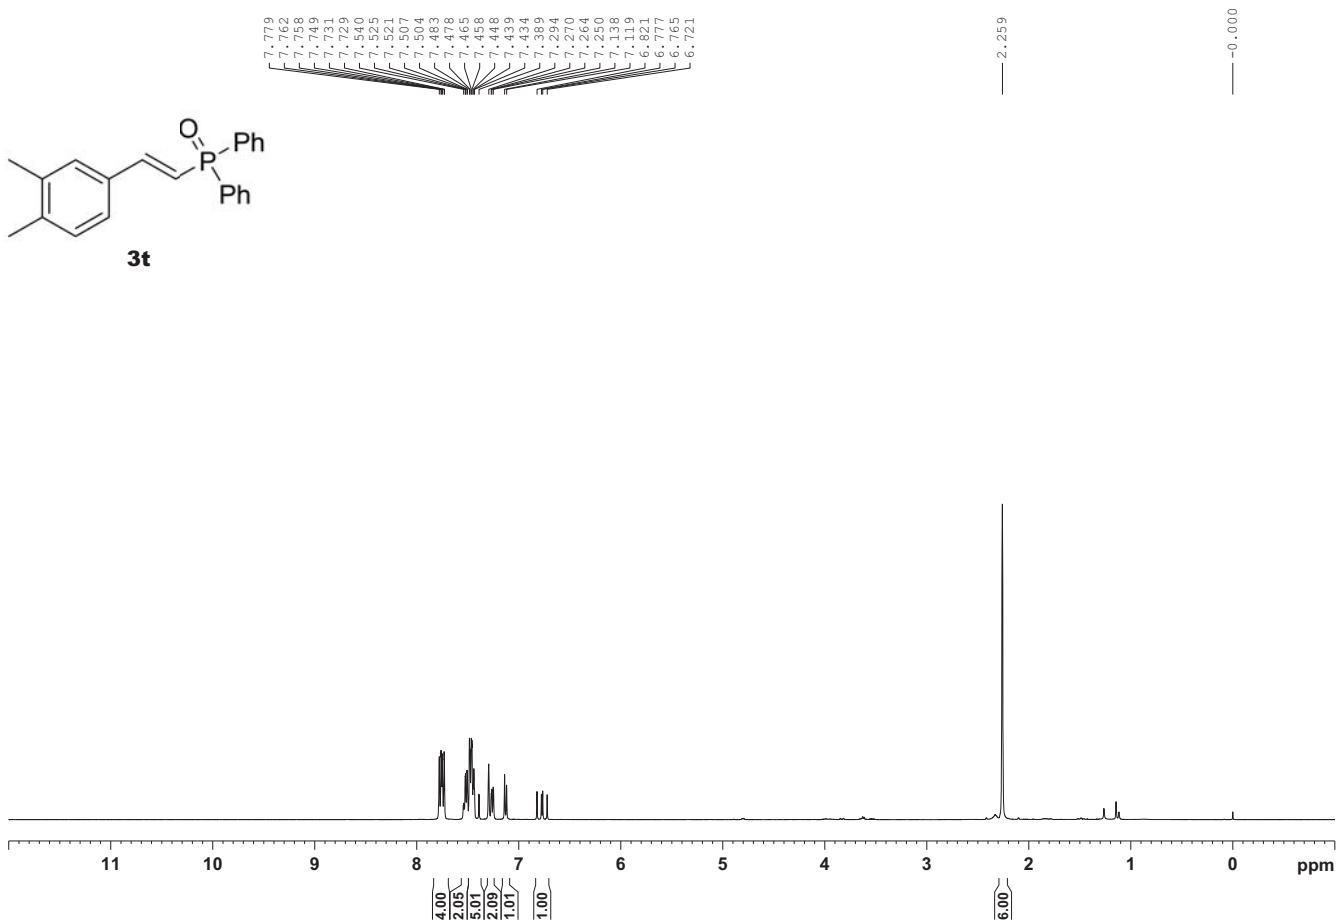



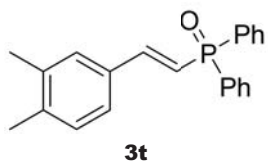

147.63  
 147.59  
 139.09  
 136.96  
 133.57  
 132.79  
 132.61  
 131.68  
 131.65  
 131.32  
 131.22  
 129.99  
 128.74  
 128.51  
 128.39  
 125.31  
 118.01  
 116.96

77.32  
 77.00  
 76.69

19.64  
 19.61

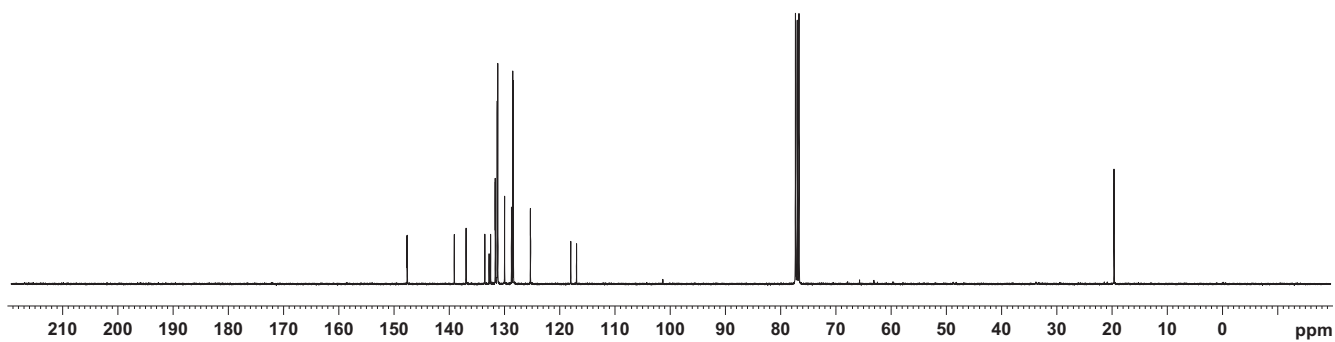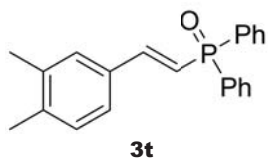

24.84

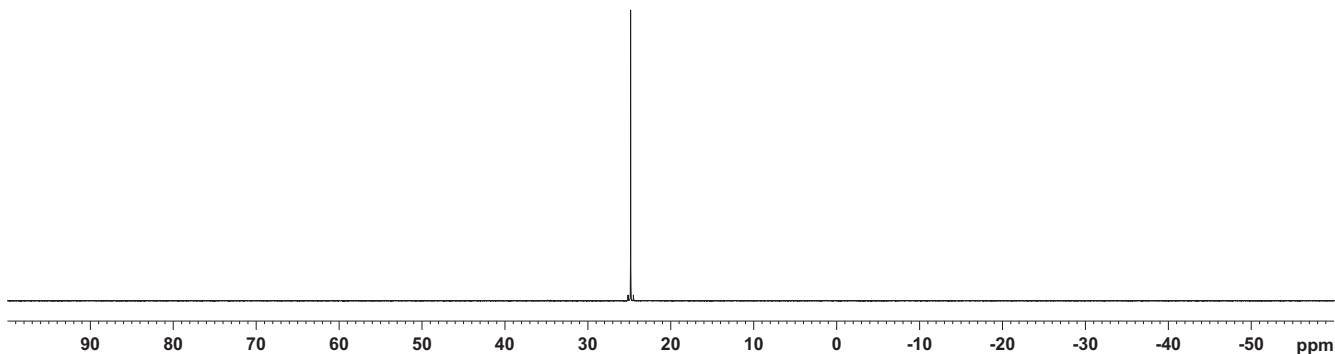

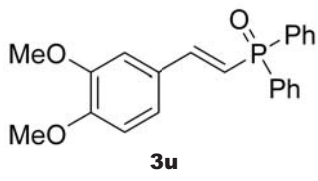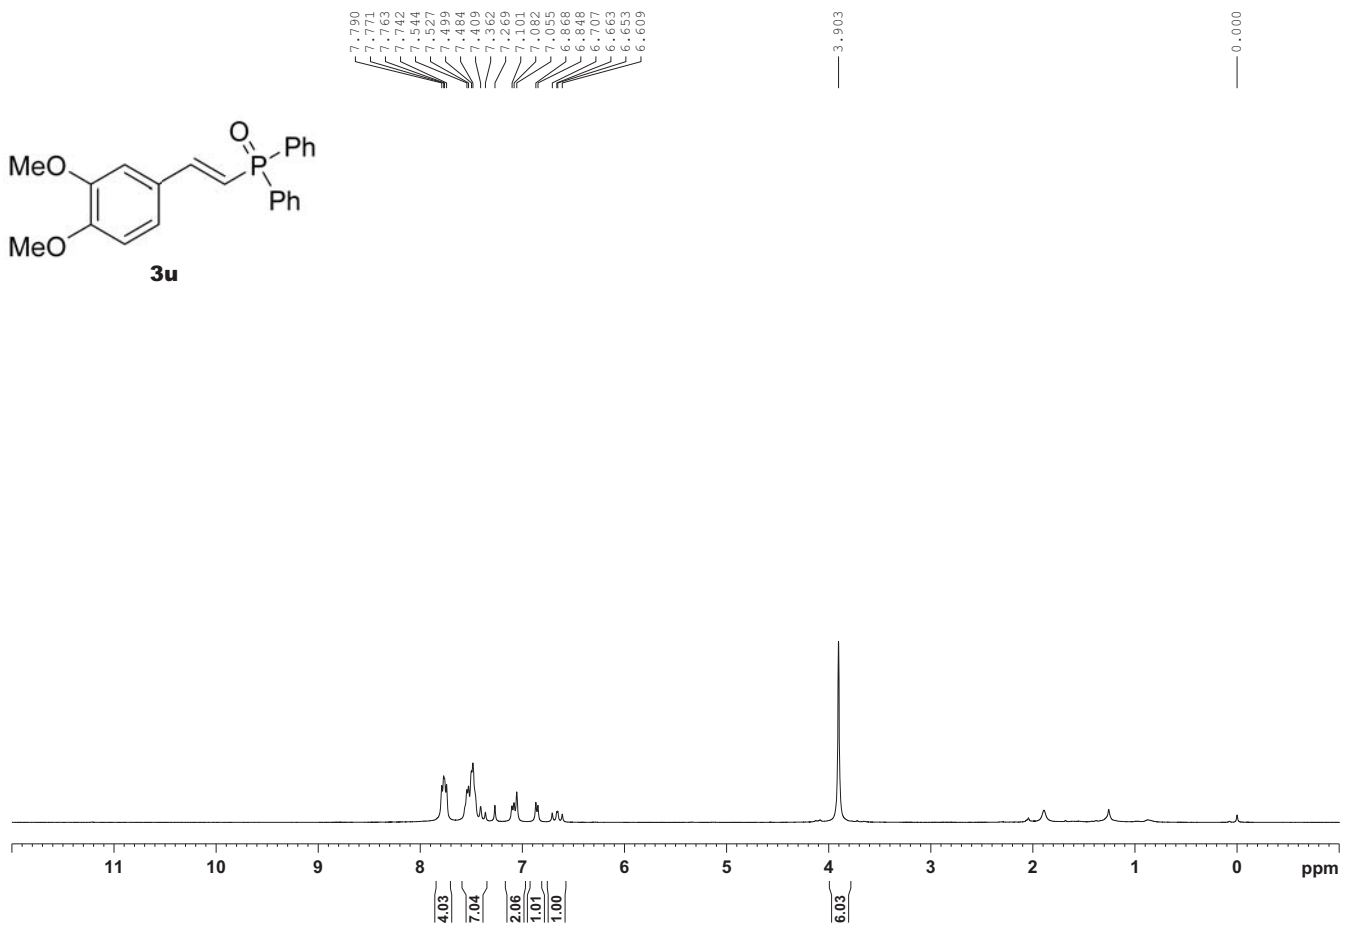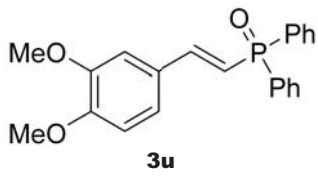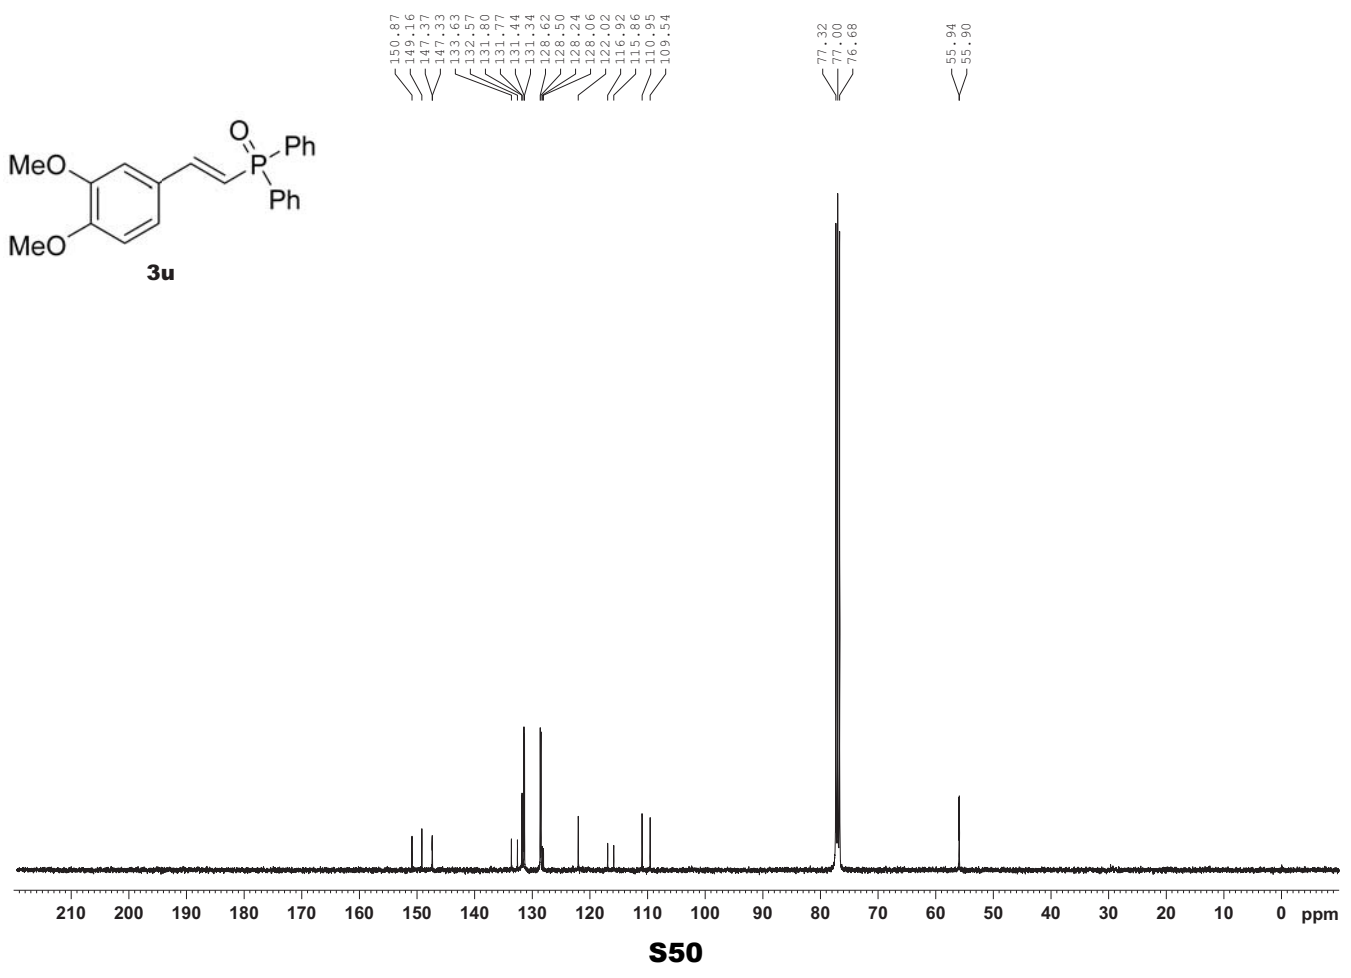

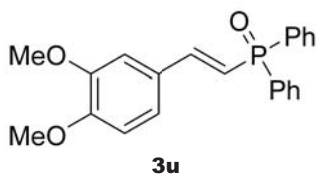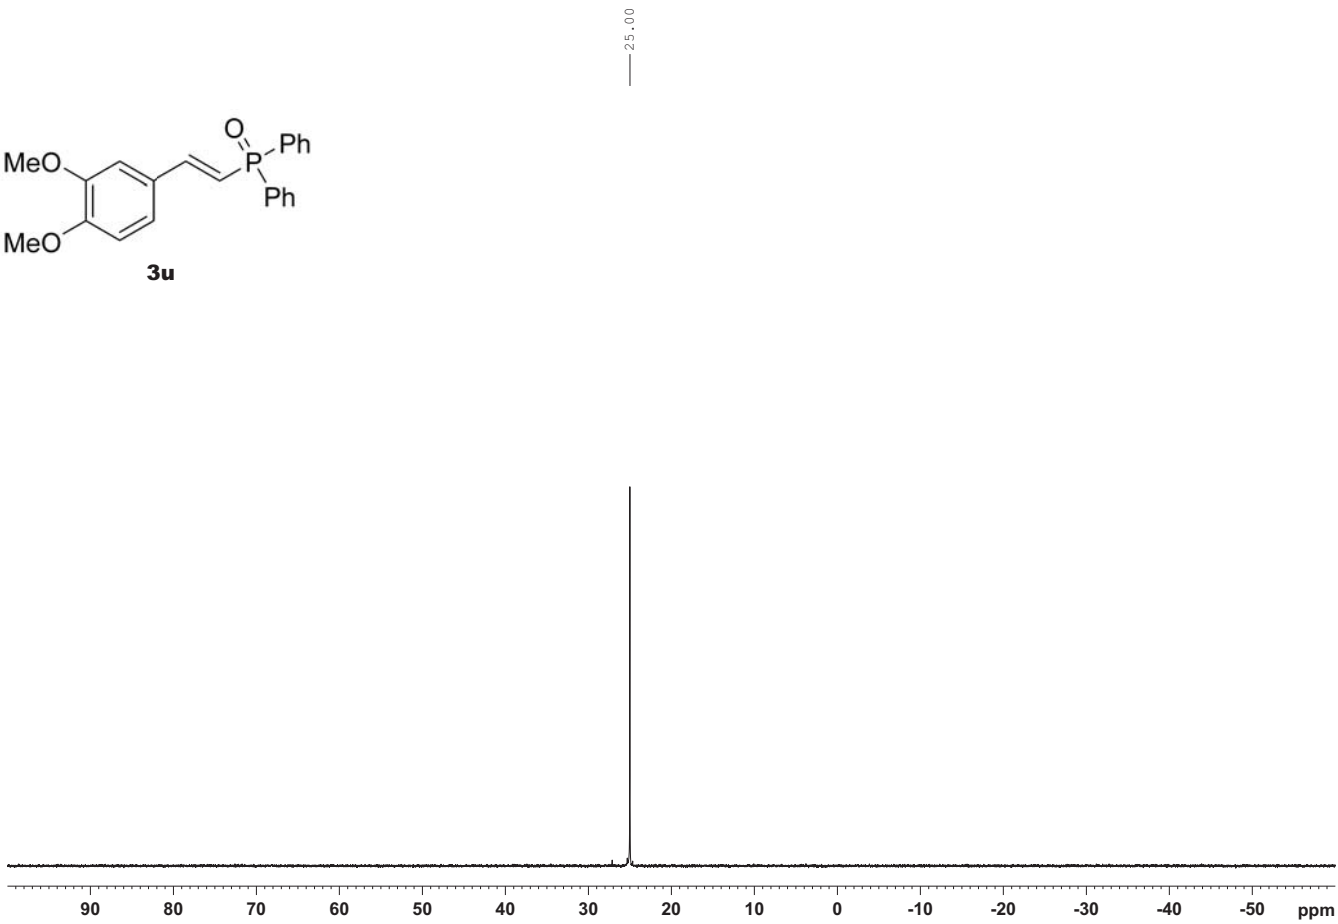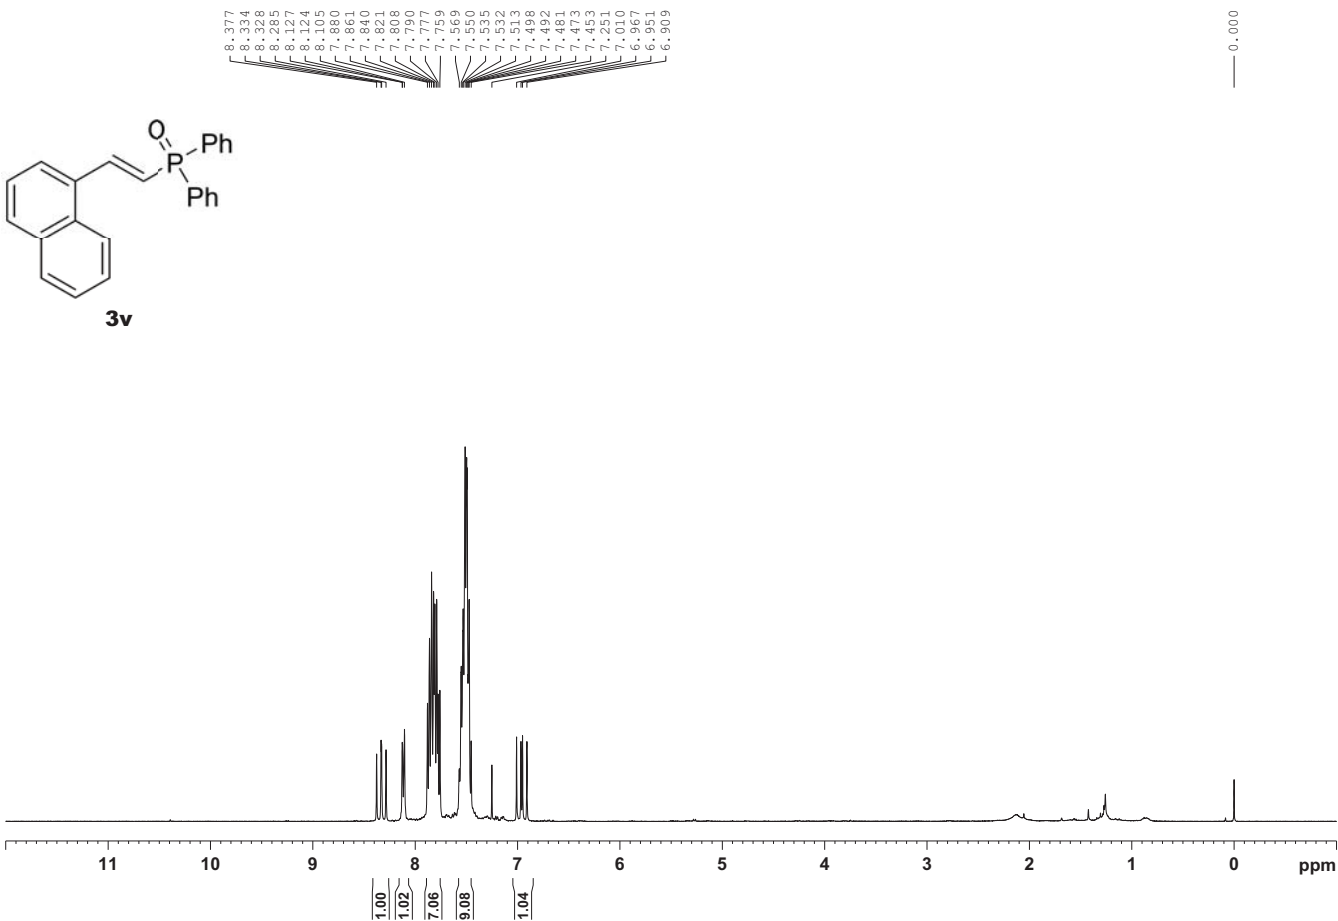

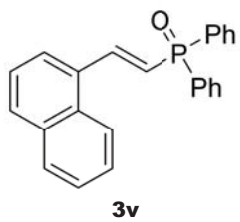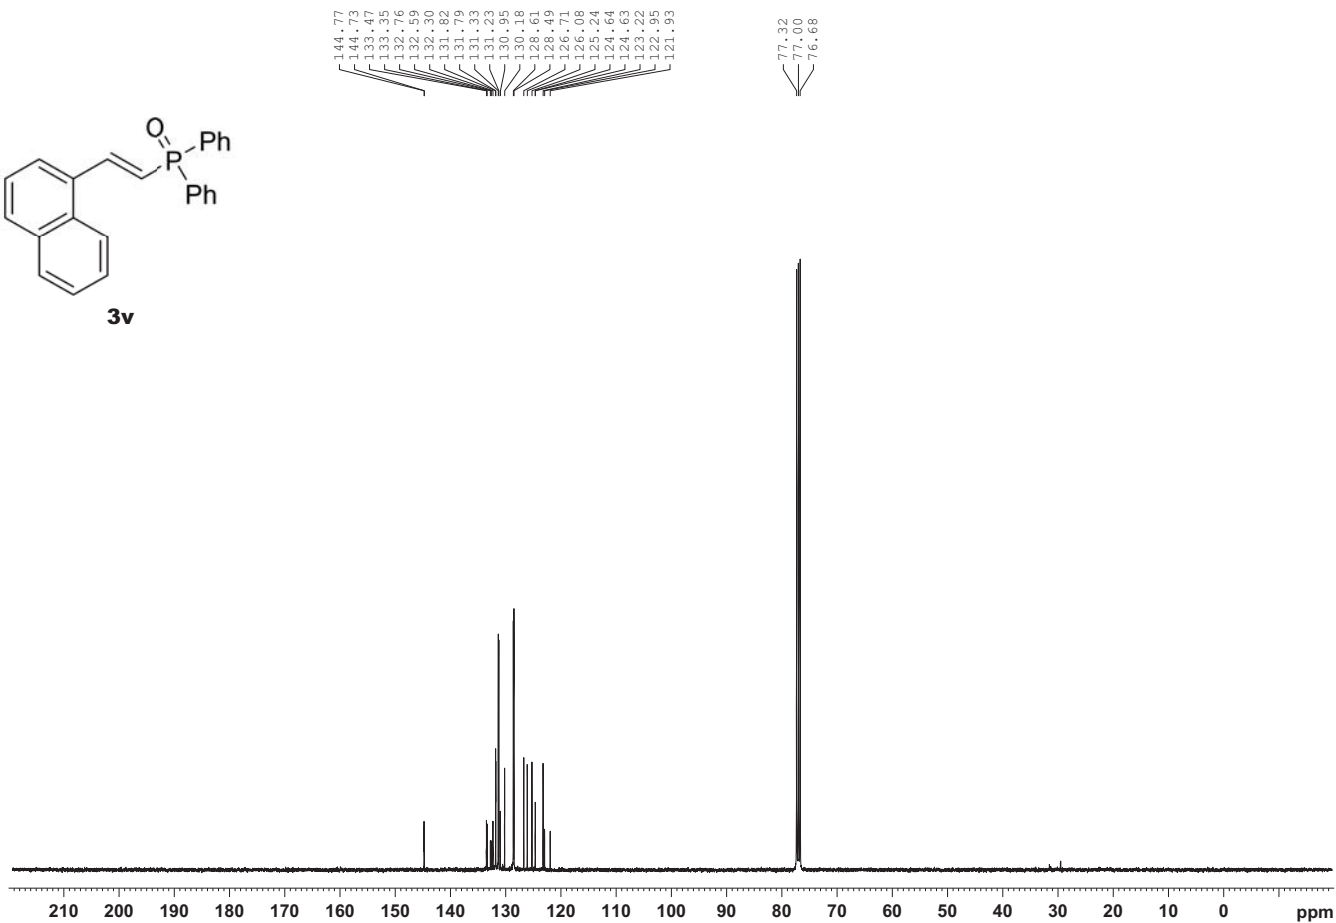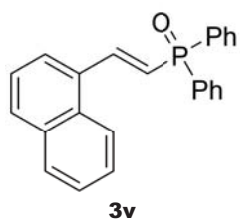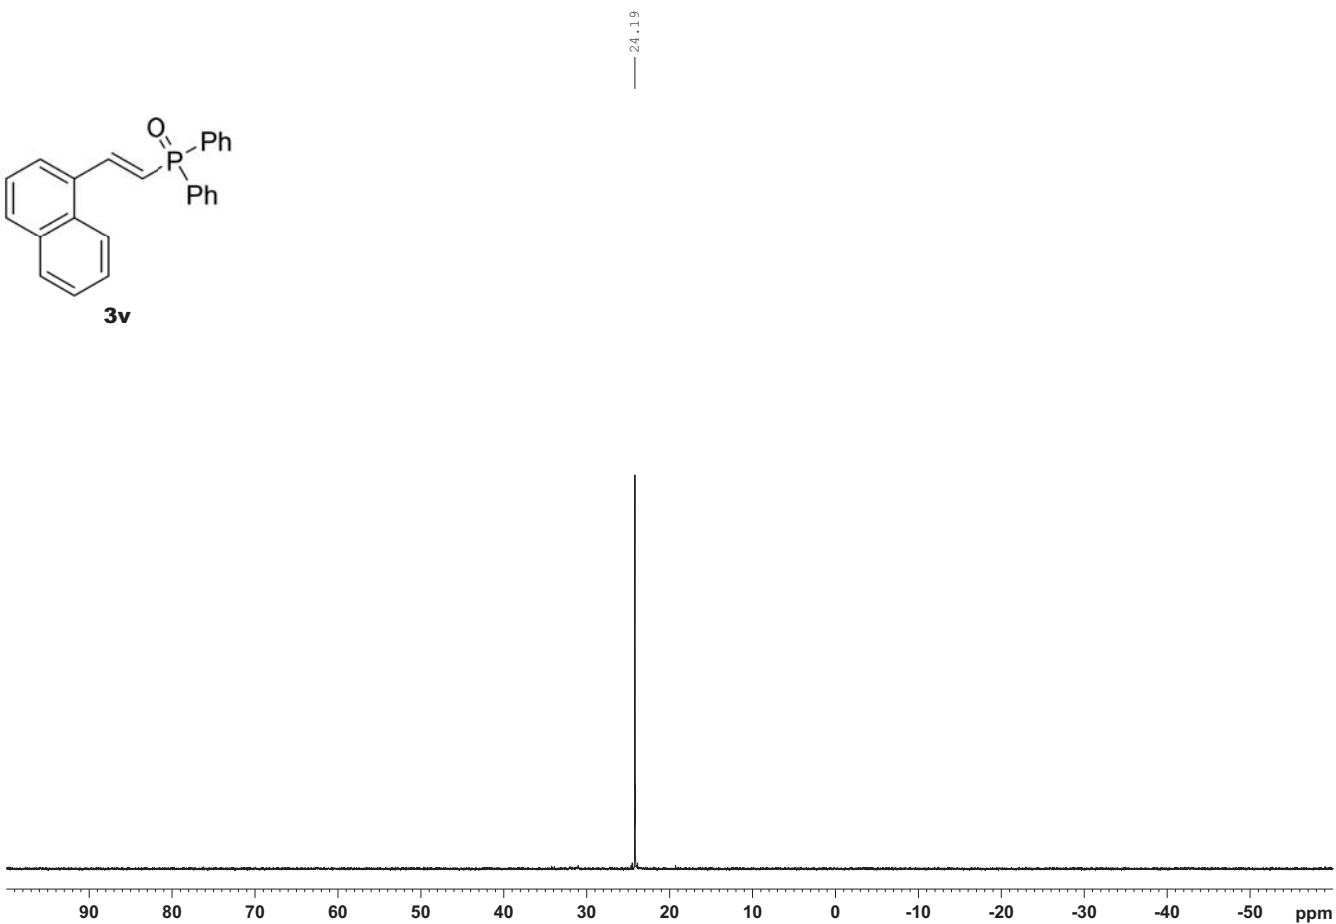

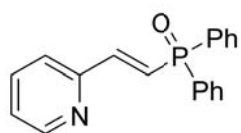

**3w**

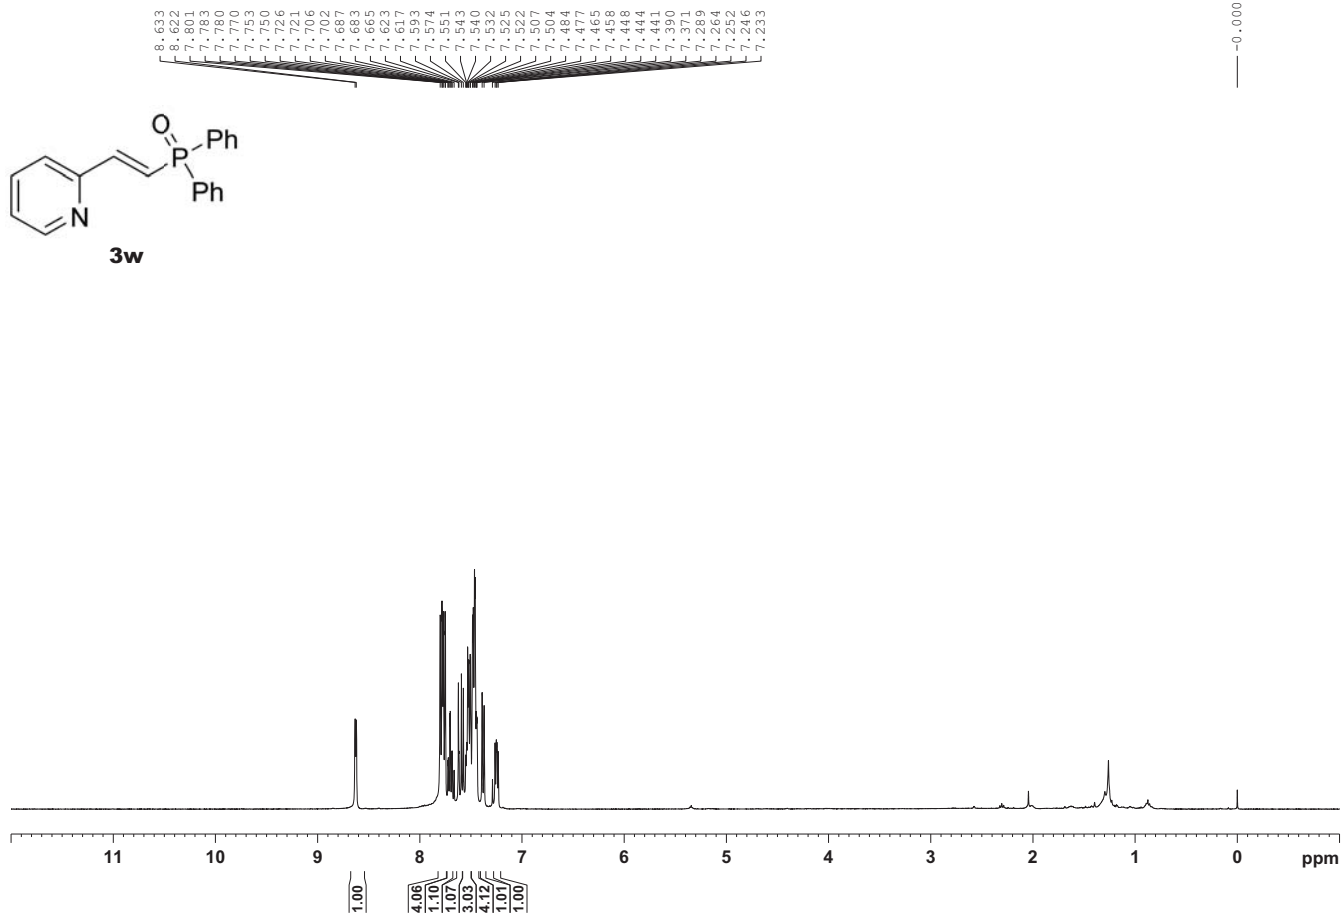

-0.000

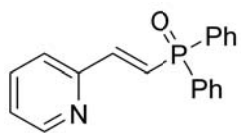

**3w**

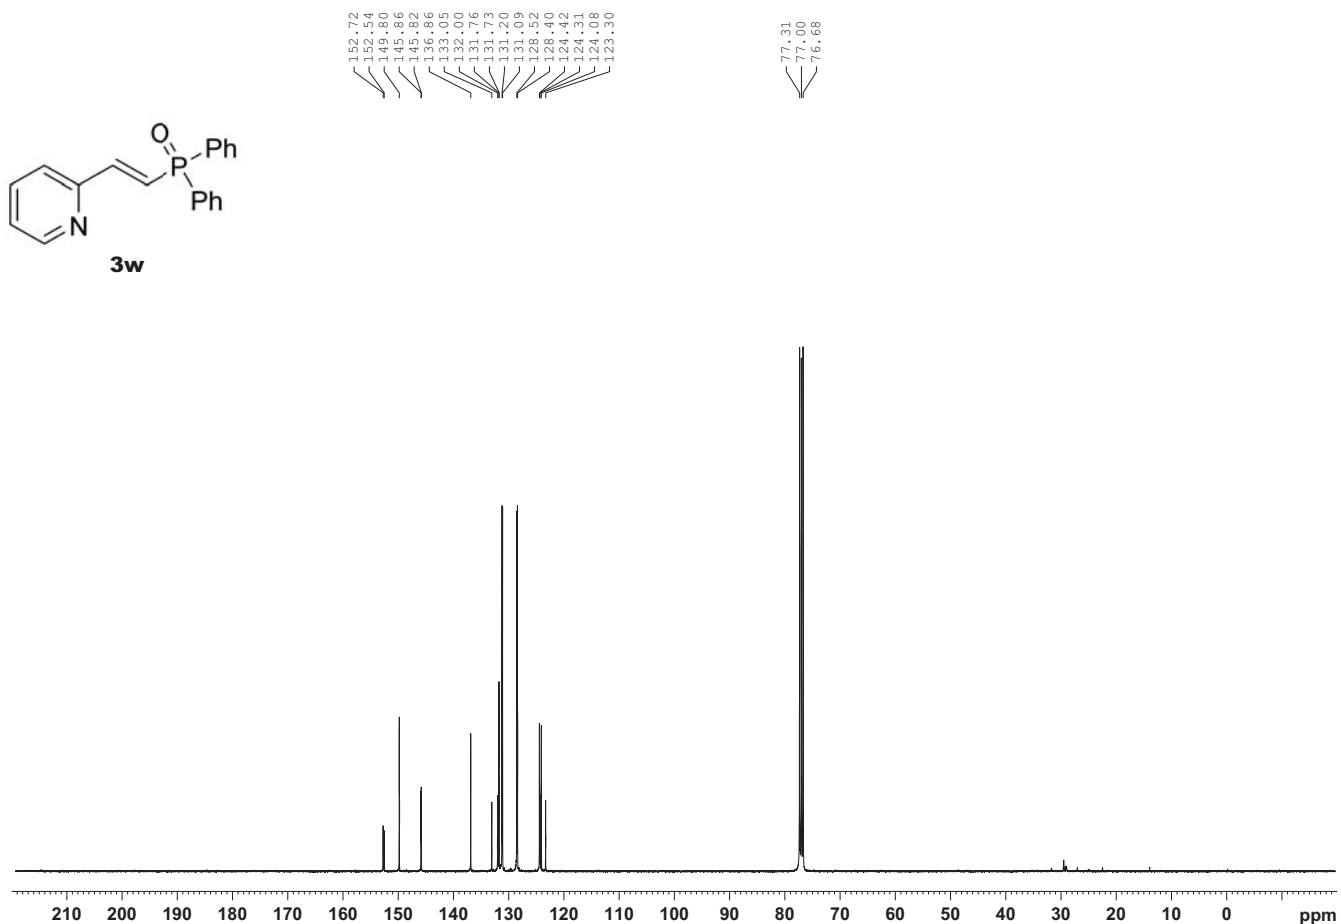

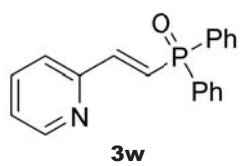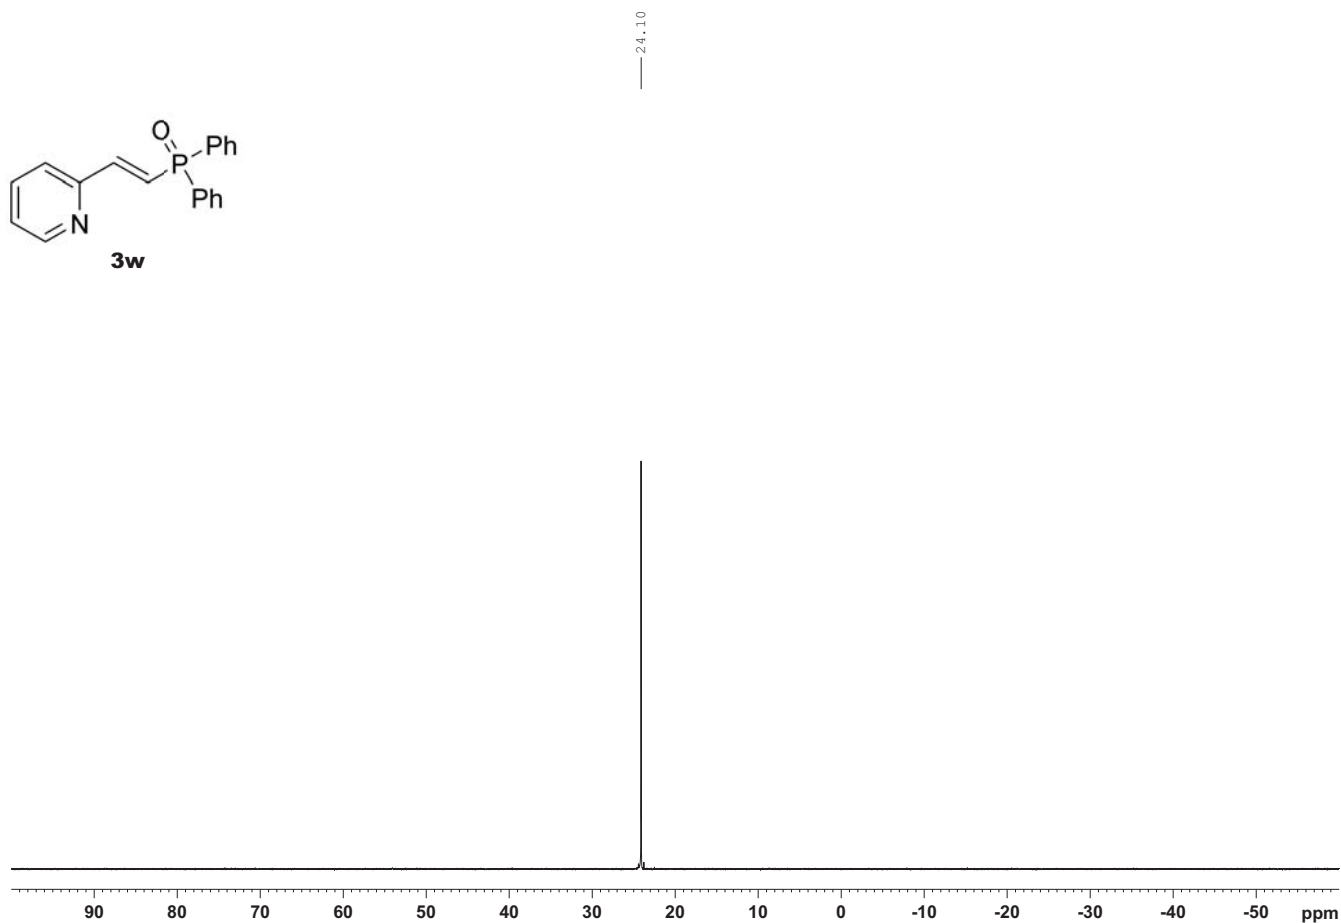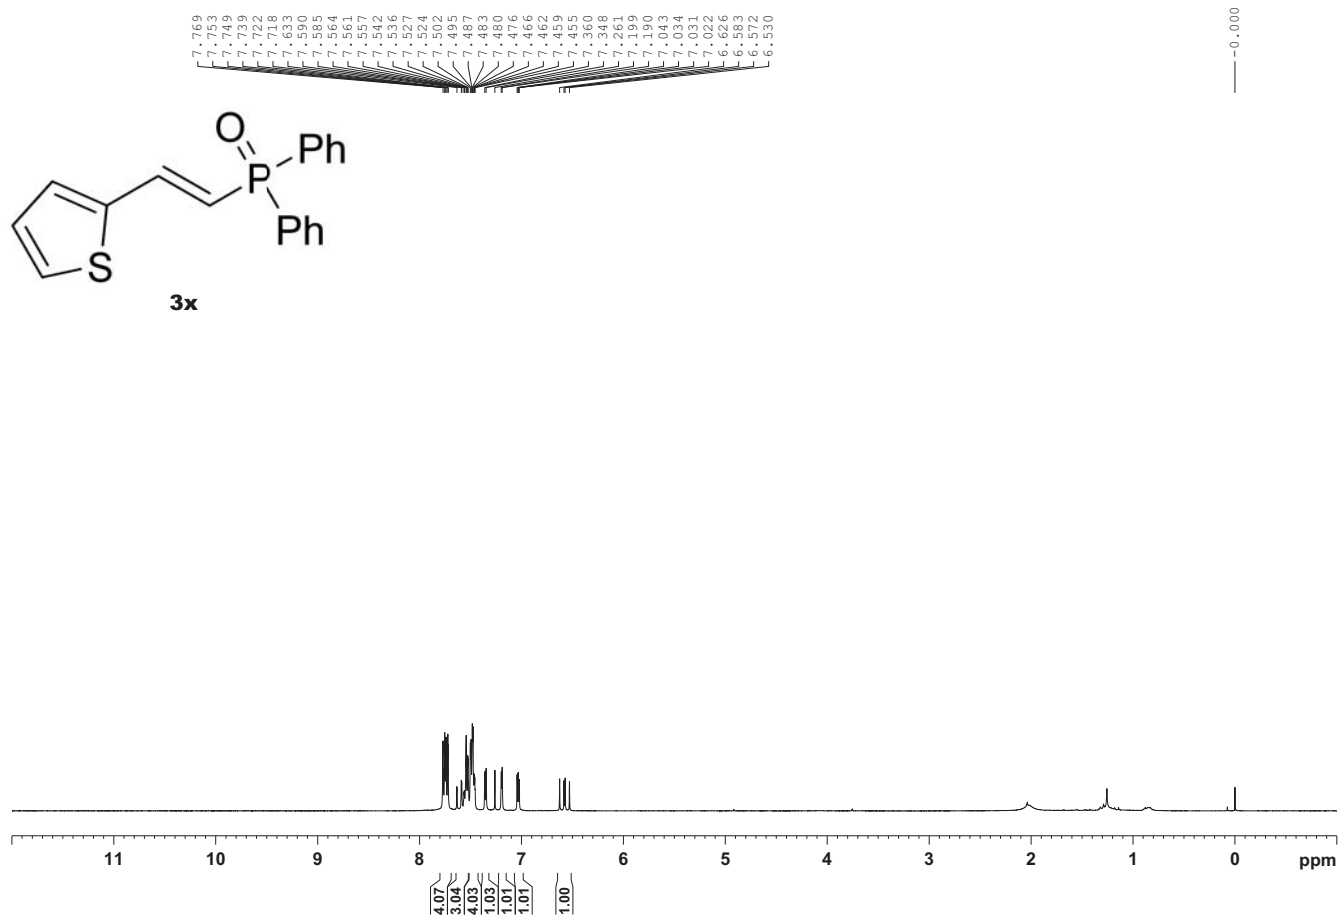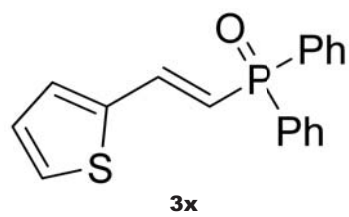

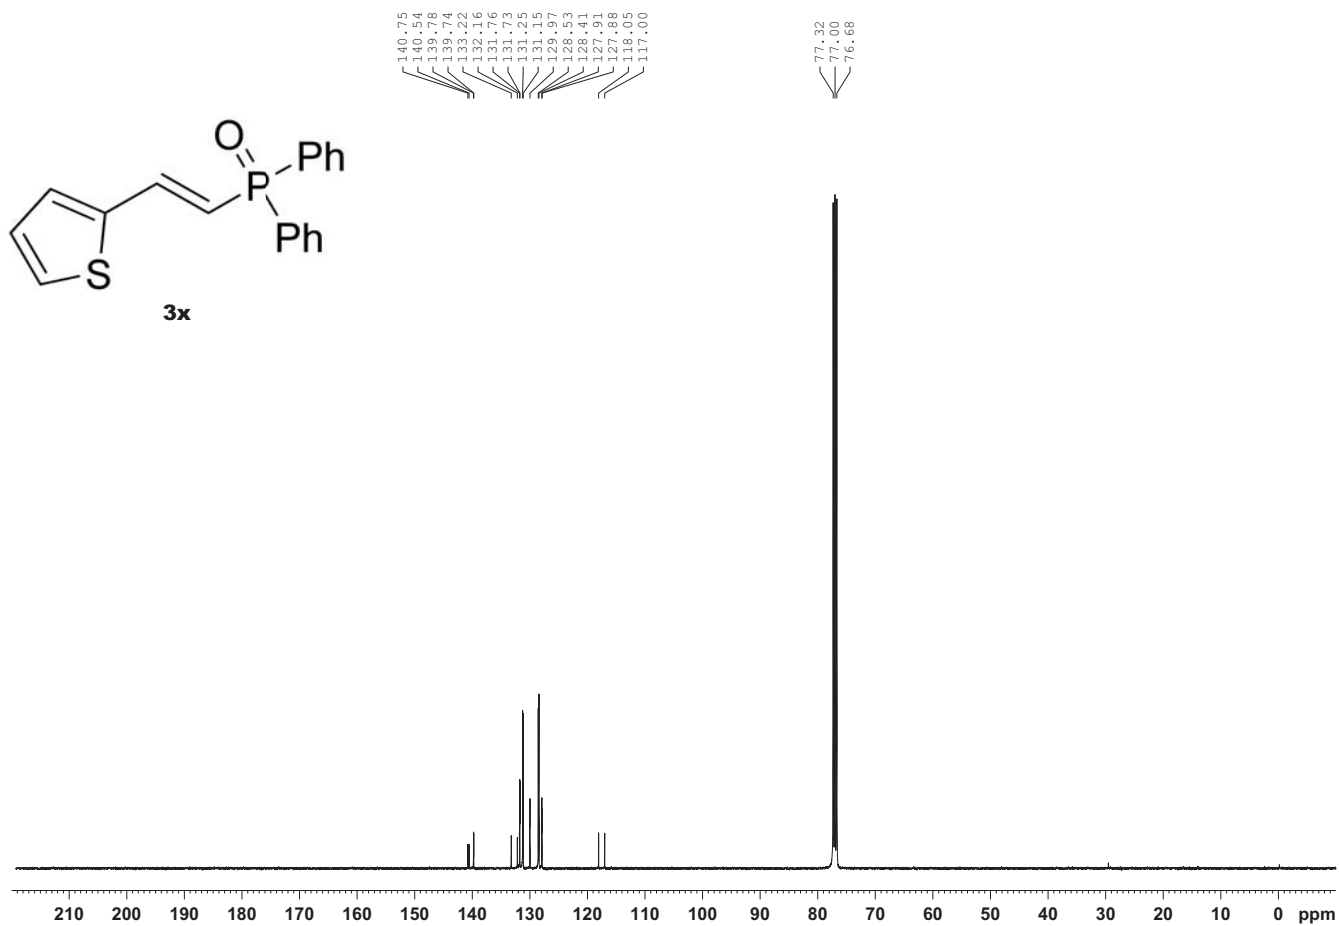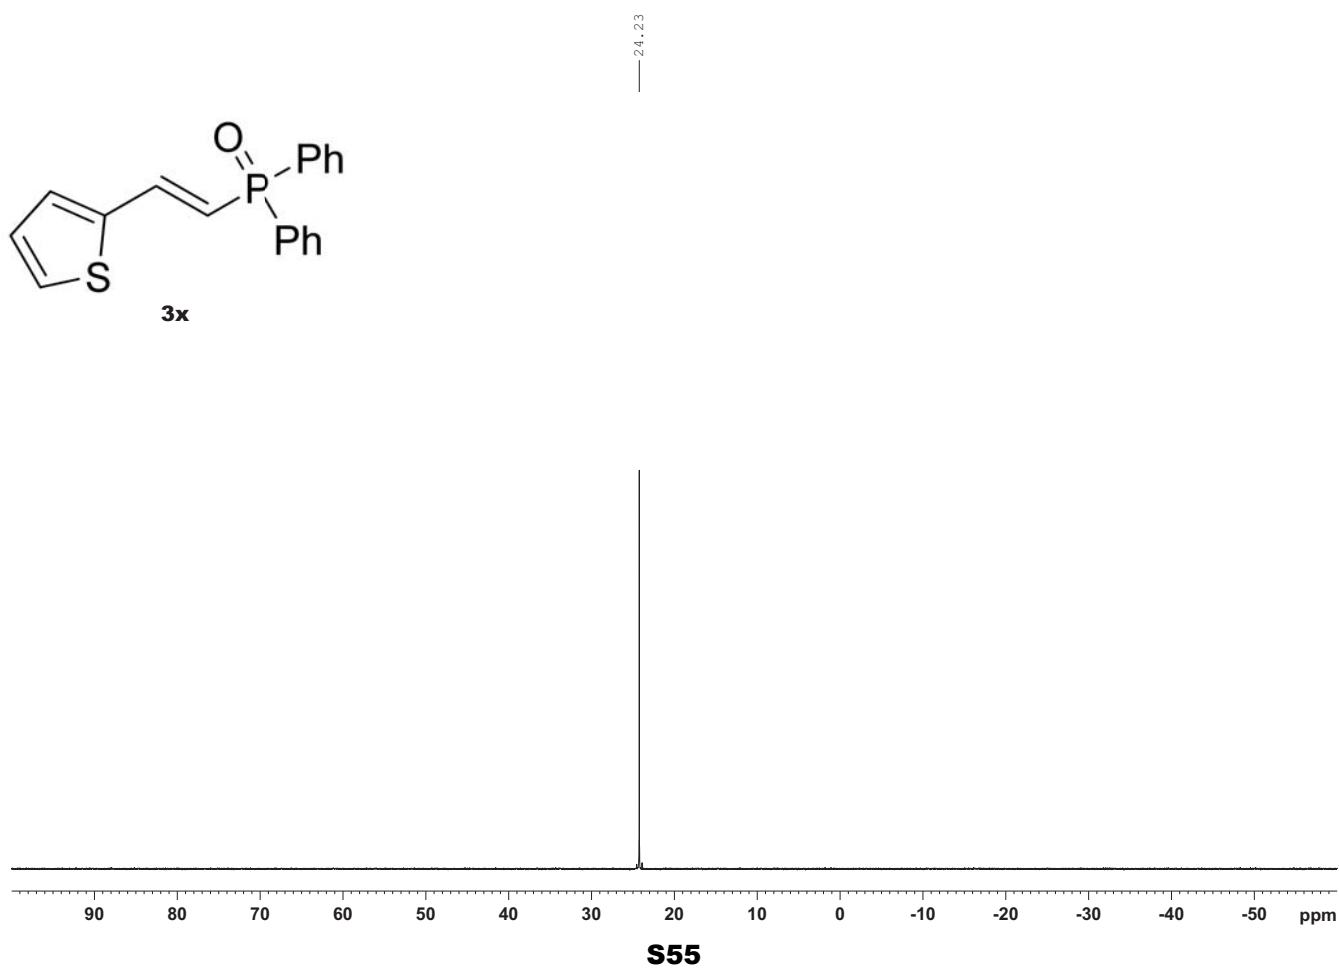

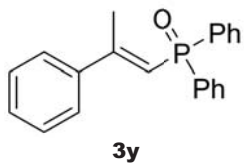

7.816  
 7.797  
 7.787  
 7.768  
 7.500  
 7.473  
 7.473  
 7.460  
 7.439  
 7.366  
 7.355  
 7.352  
 7.237  
 6.428  
 6.369

2.502  
 2.496

-0.000

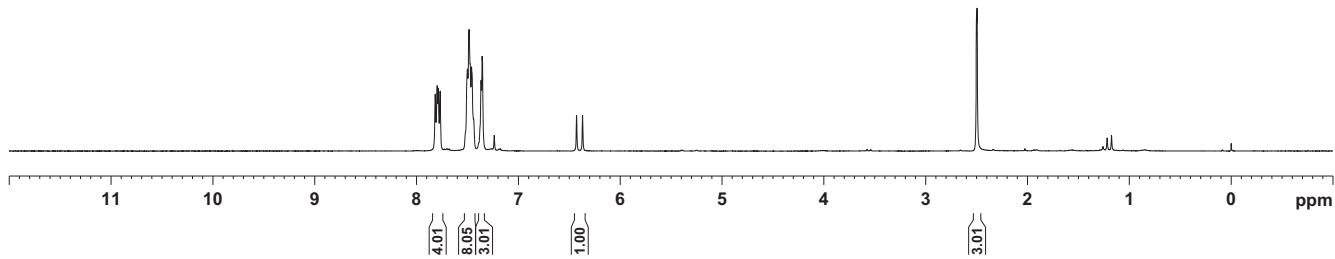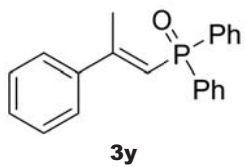

158.60  
 158.57  
 141.44  
 141.27  
 134.43  
 133.39  
 130.84  
 130.82  
 130.16  
 128.48  
 127.99  
 127.87  
 127.81  
 125.25  
 118.13  
 117.09

77.32  
 77.00  
 76.68

18.99  
 18.92

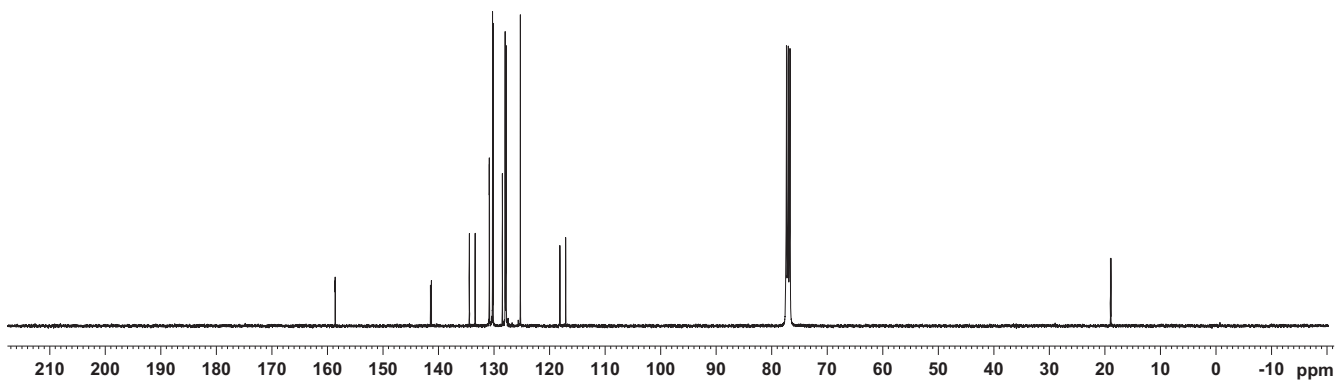



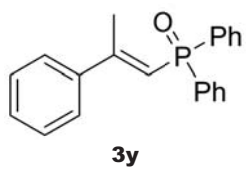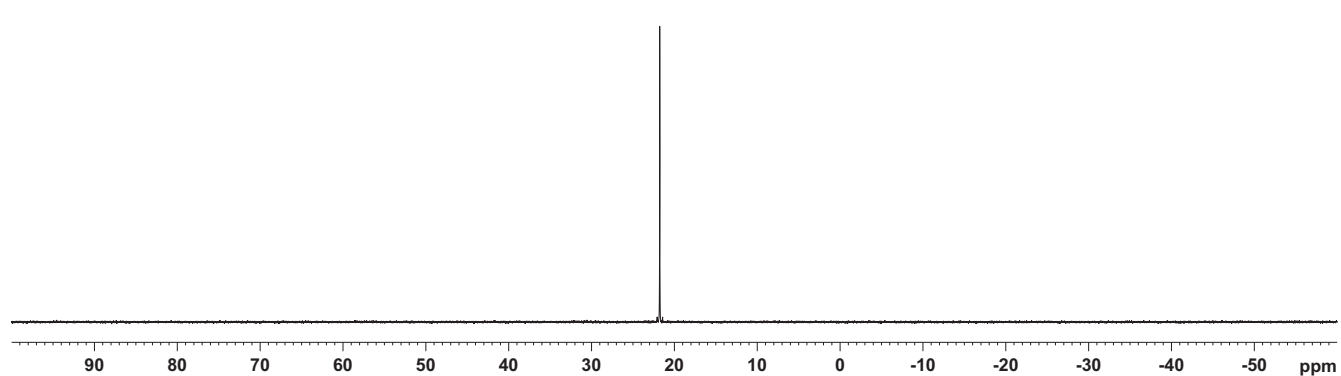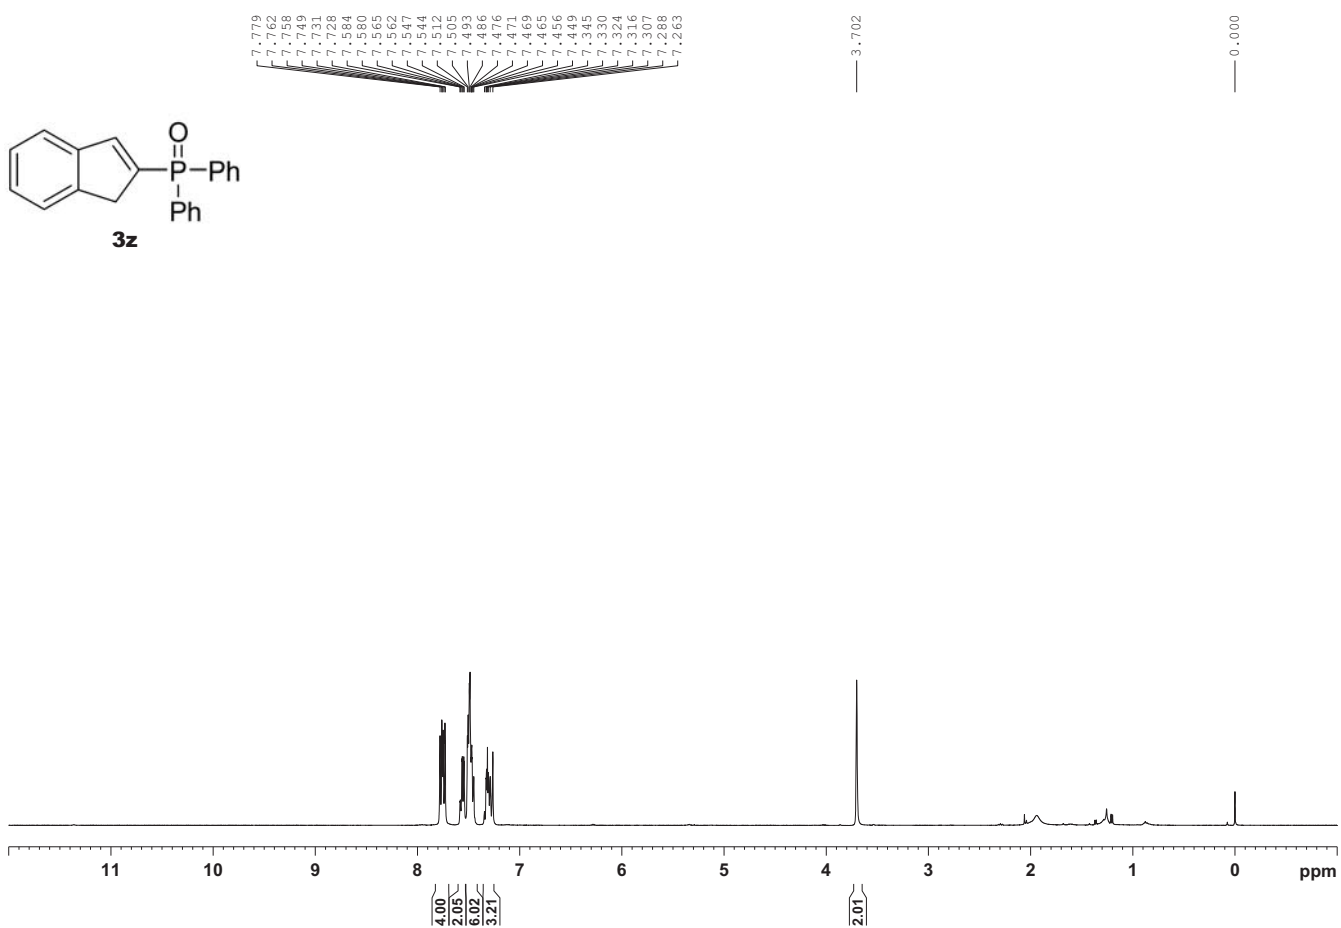

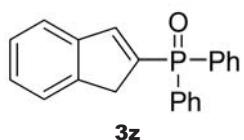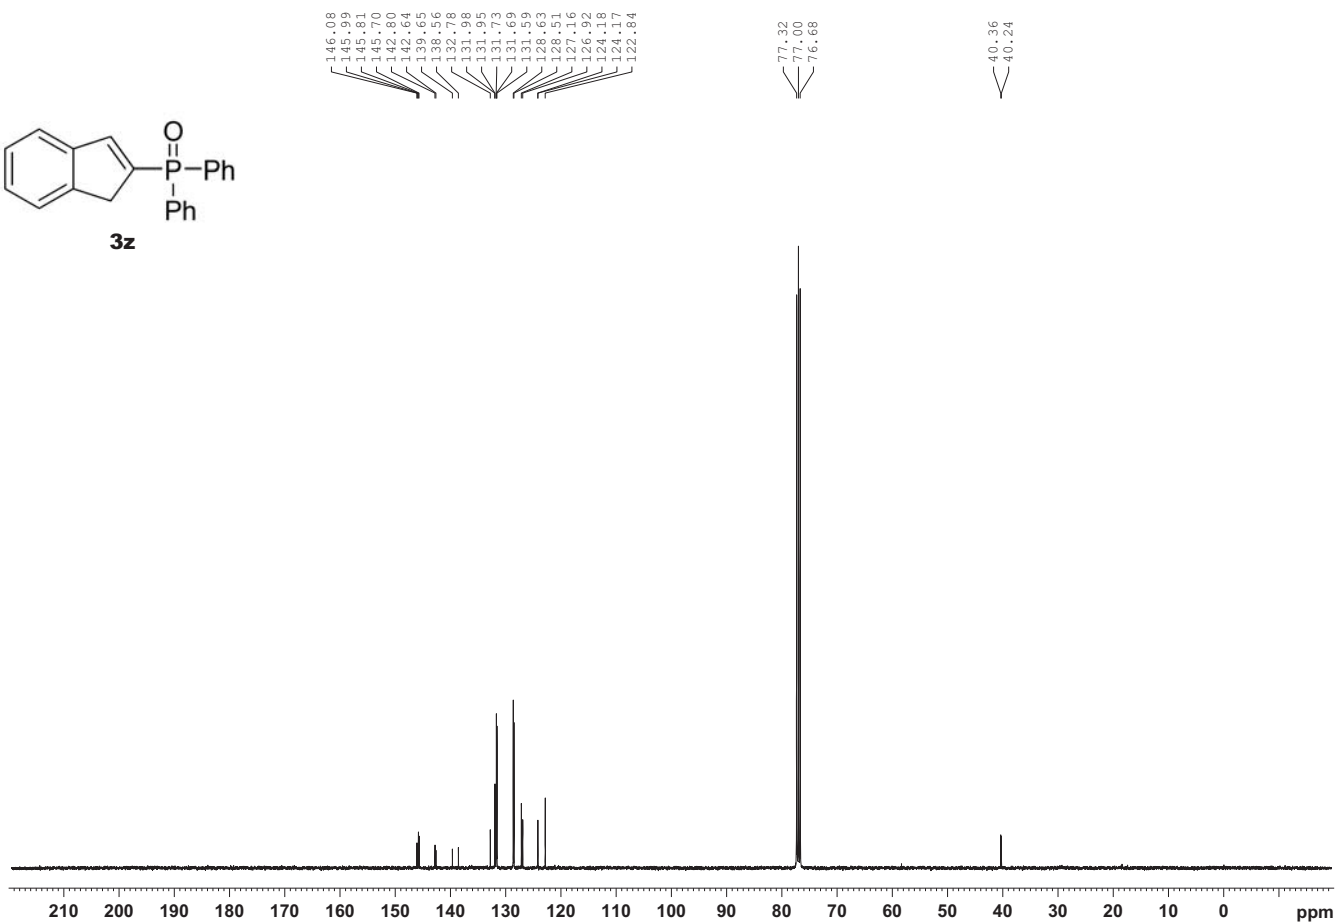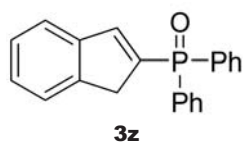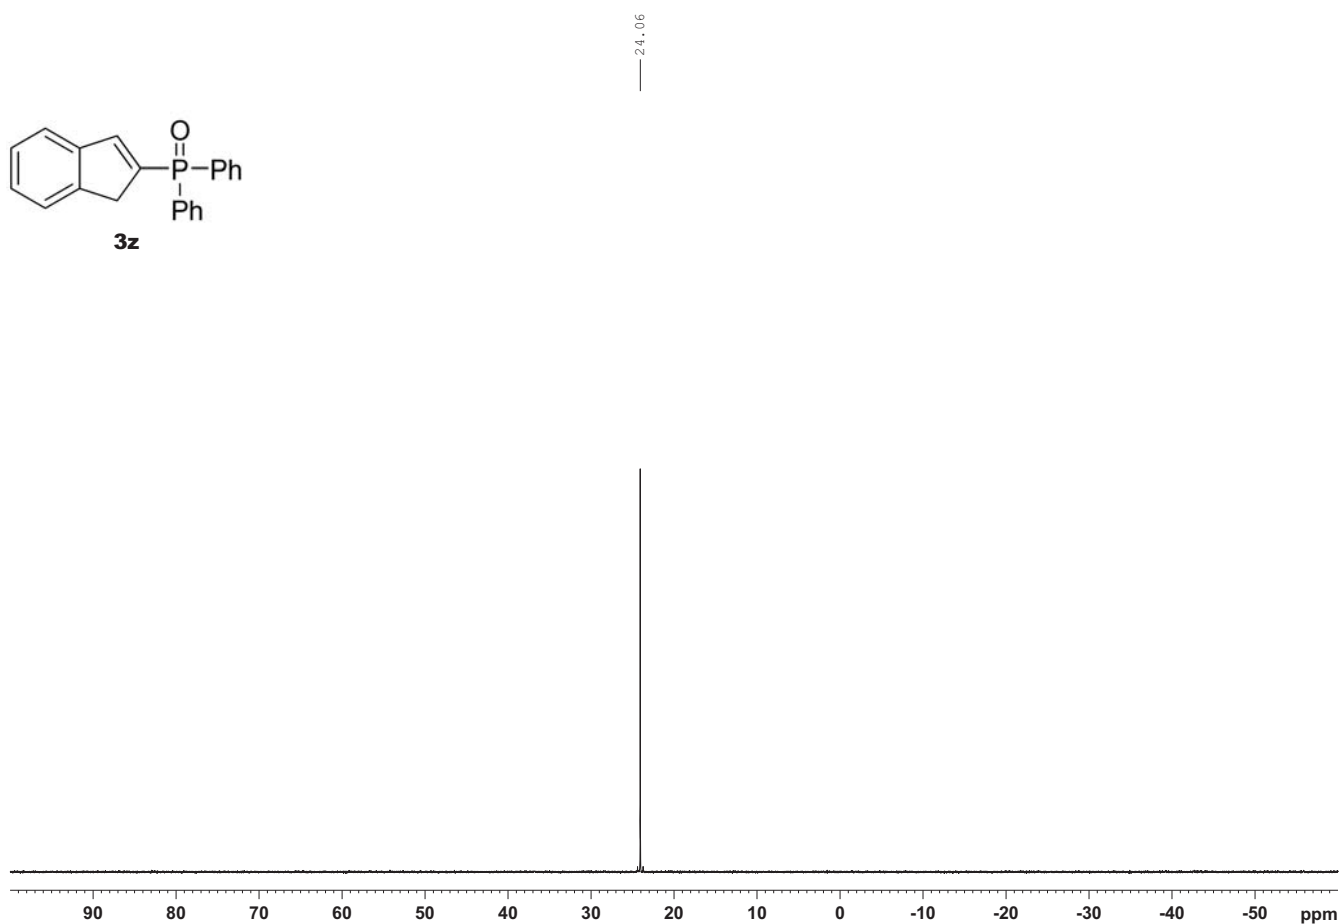

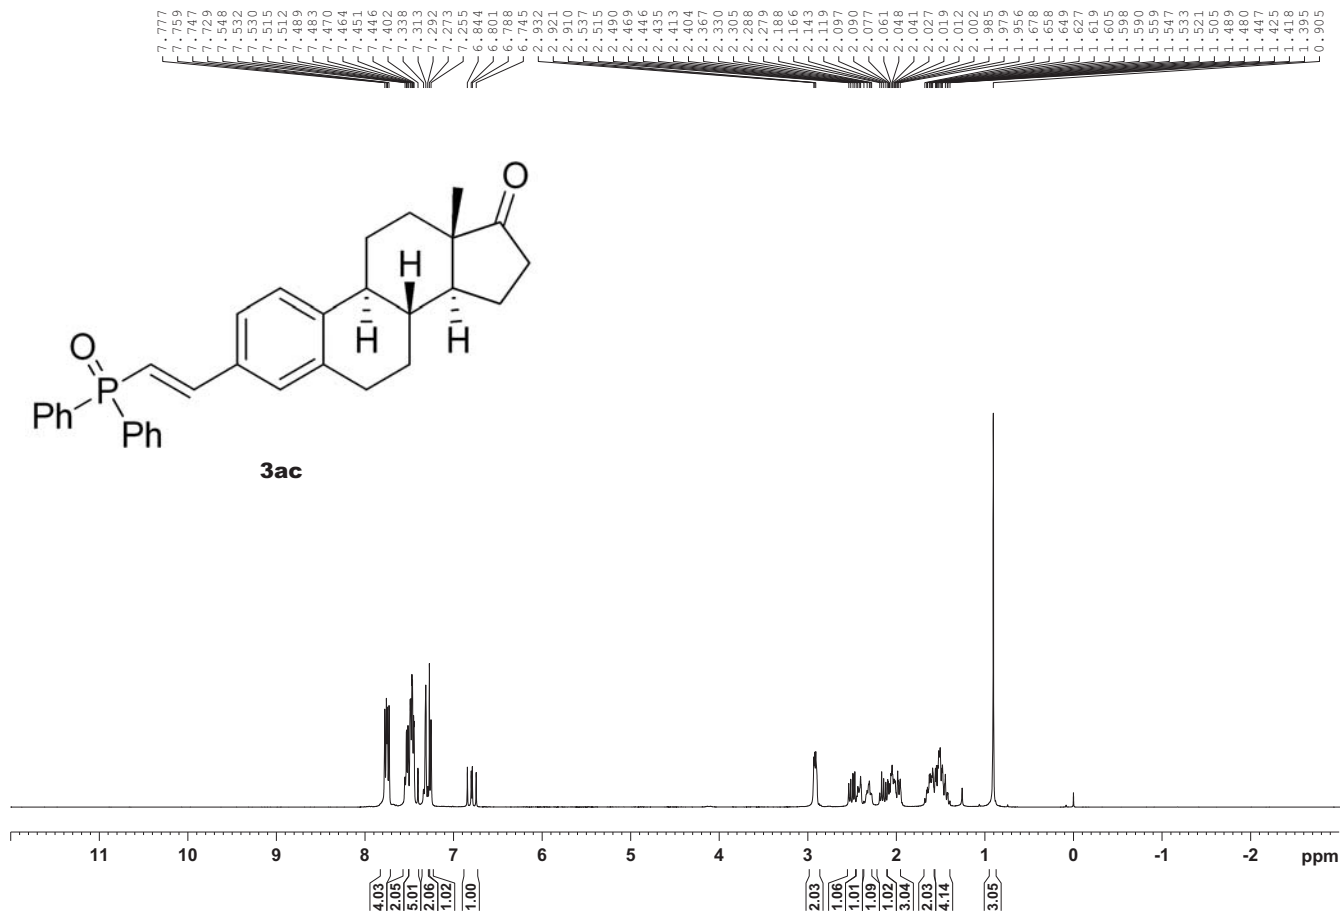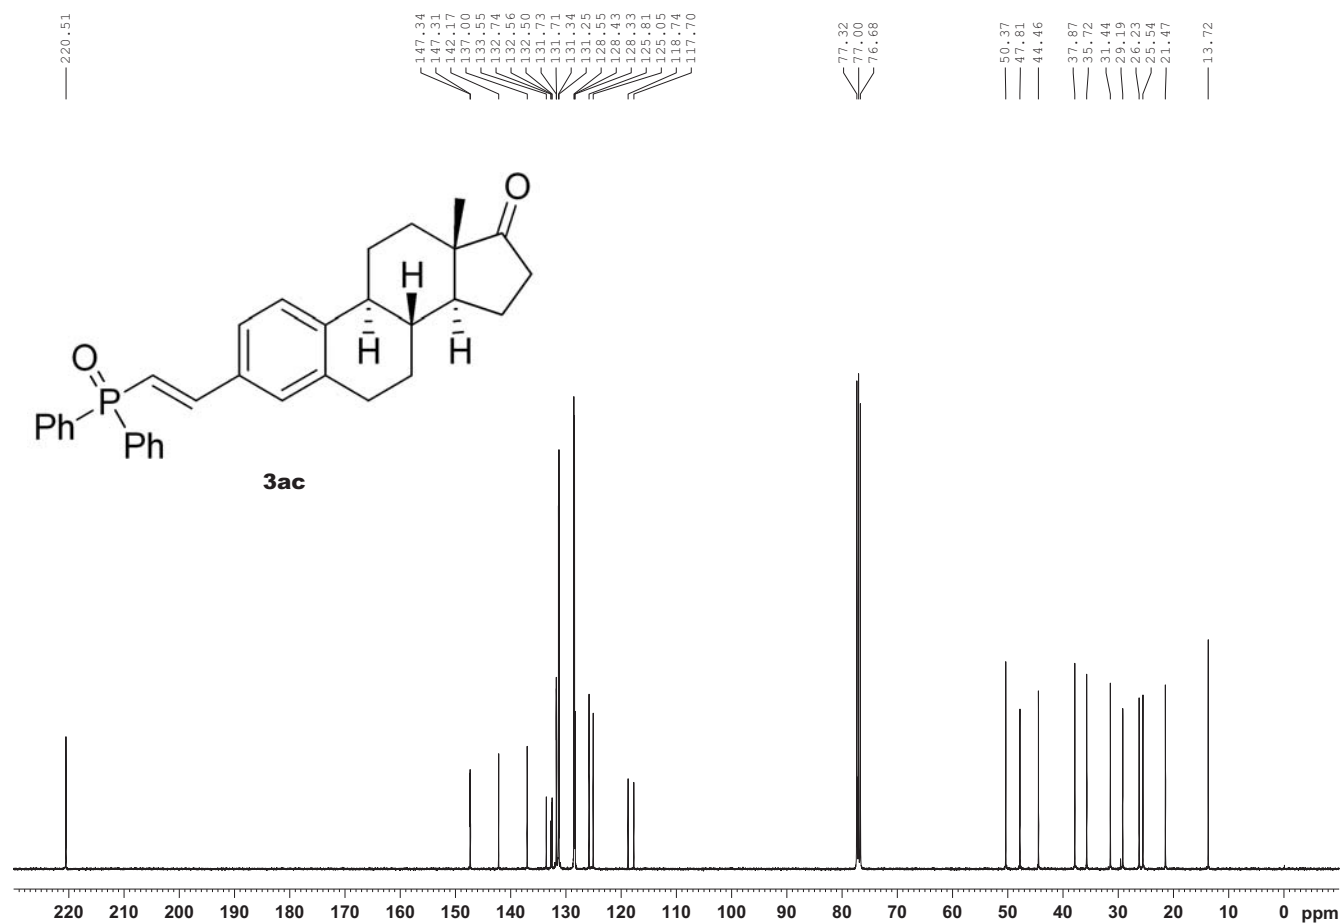

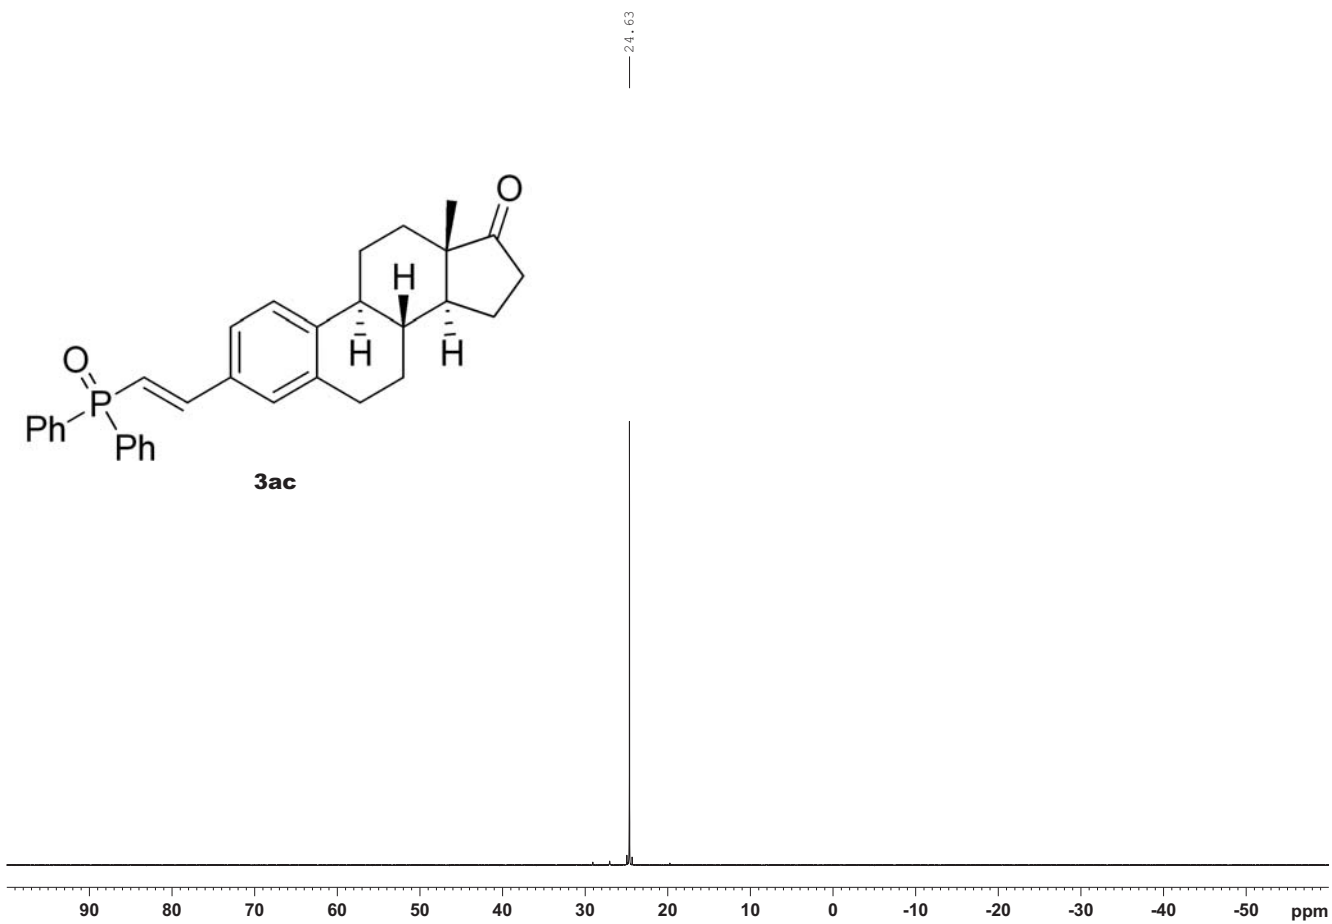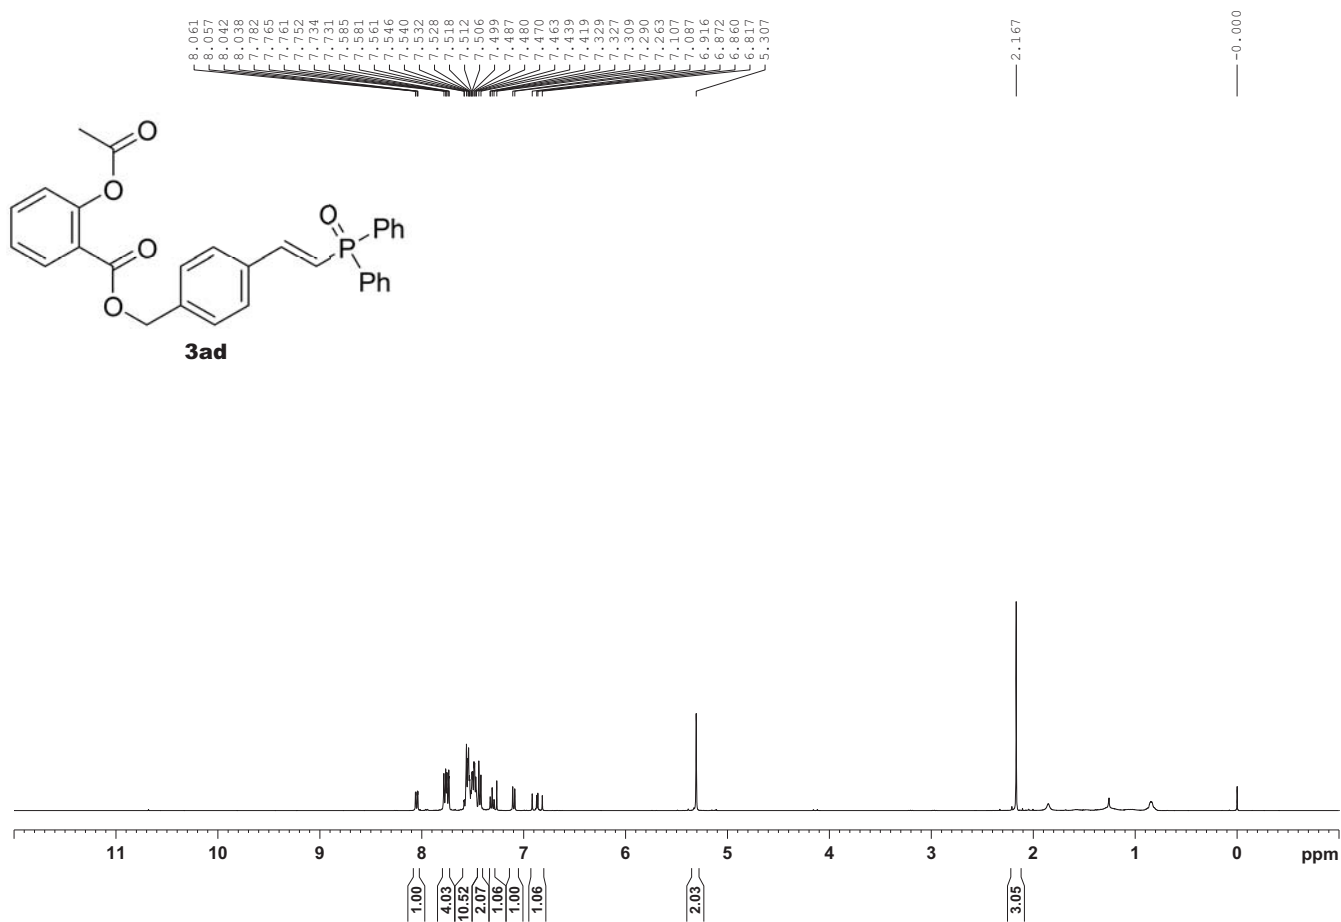

S60

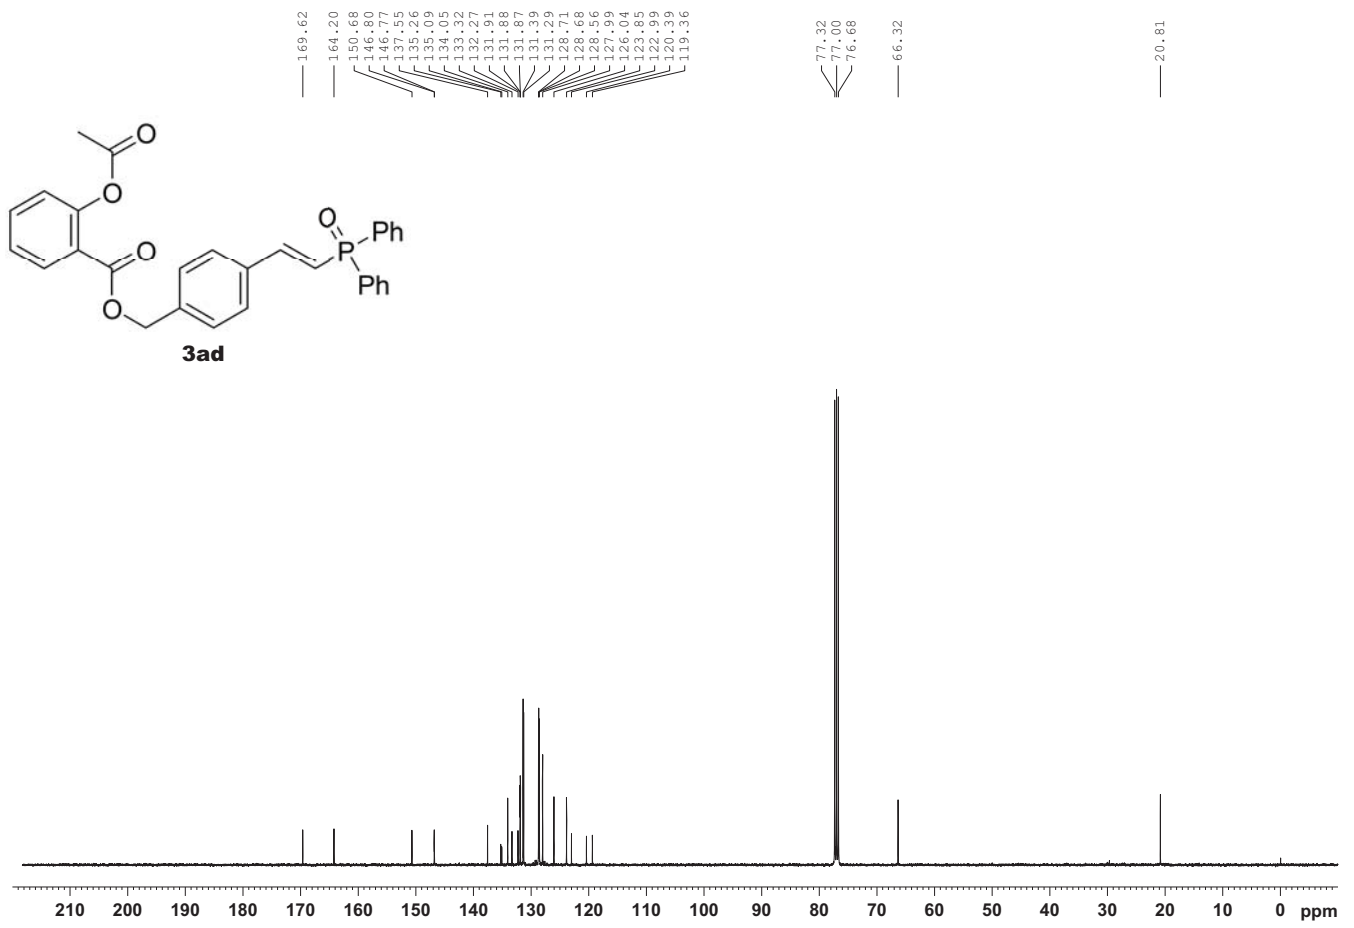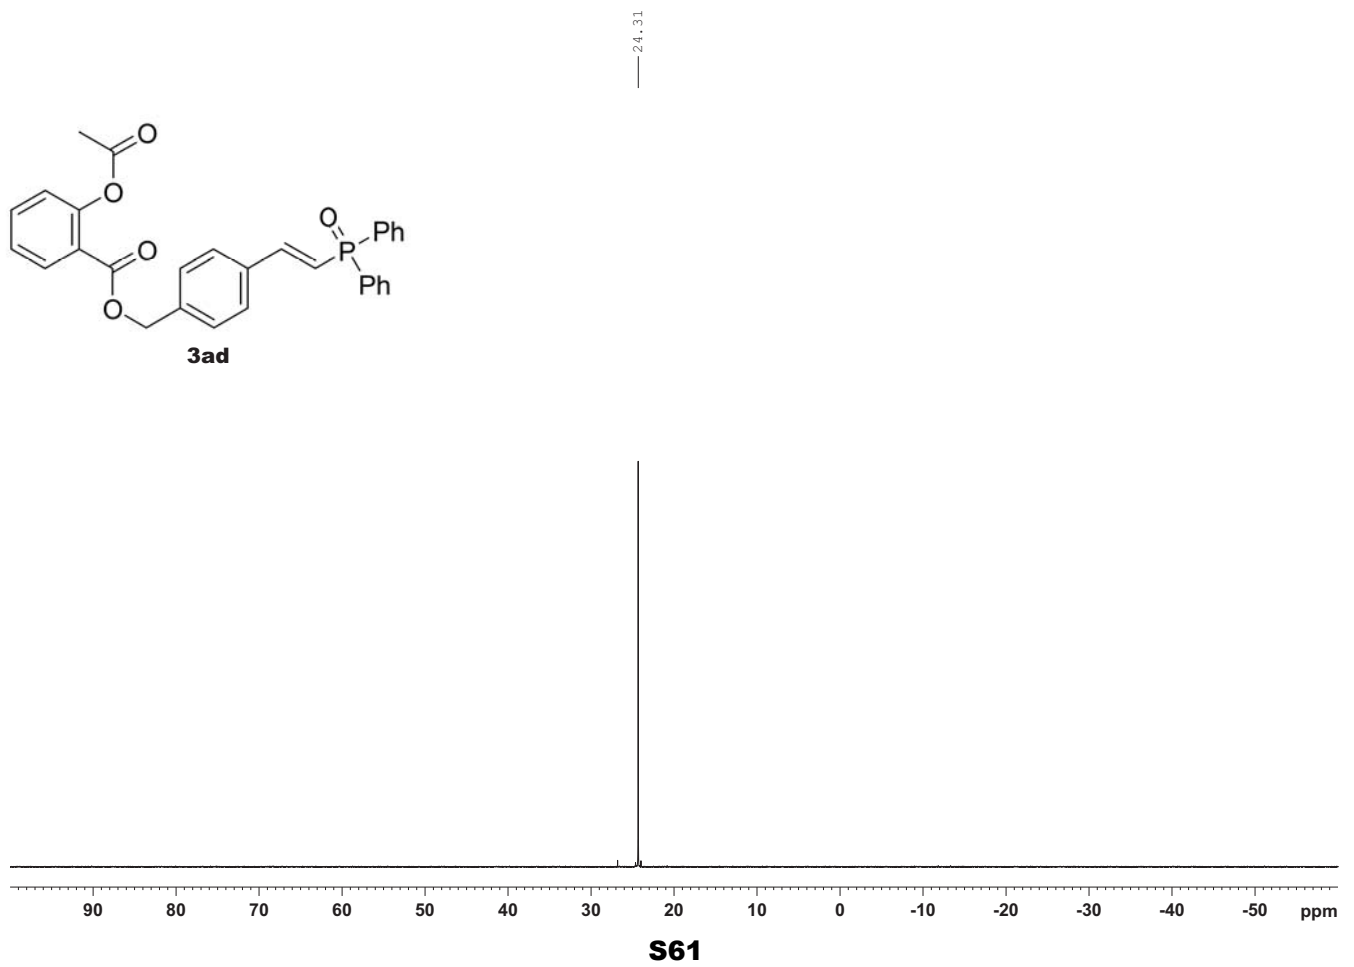

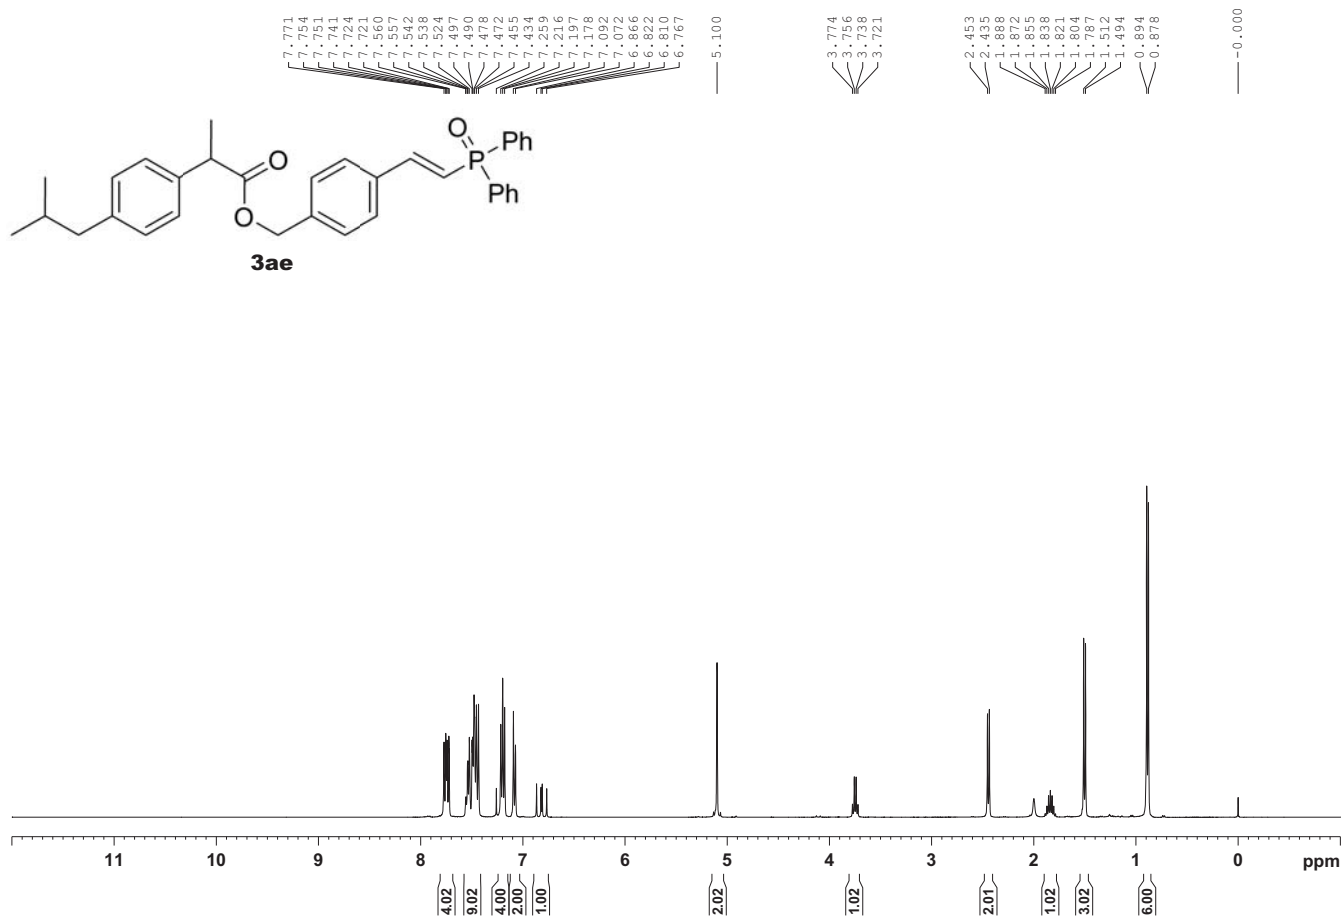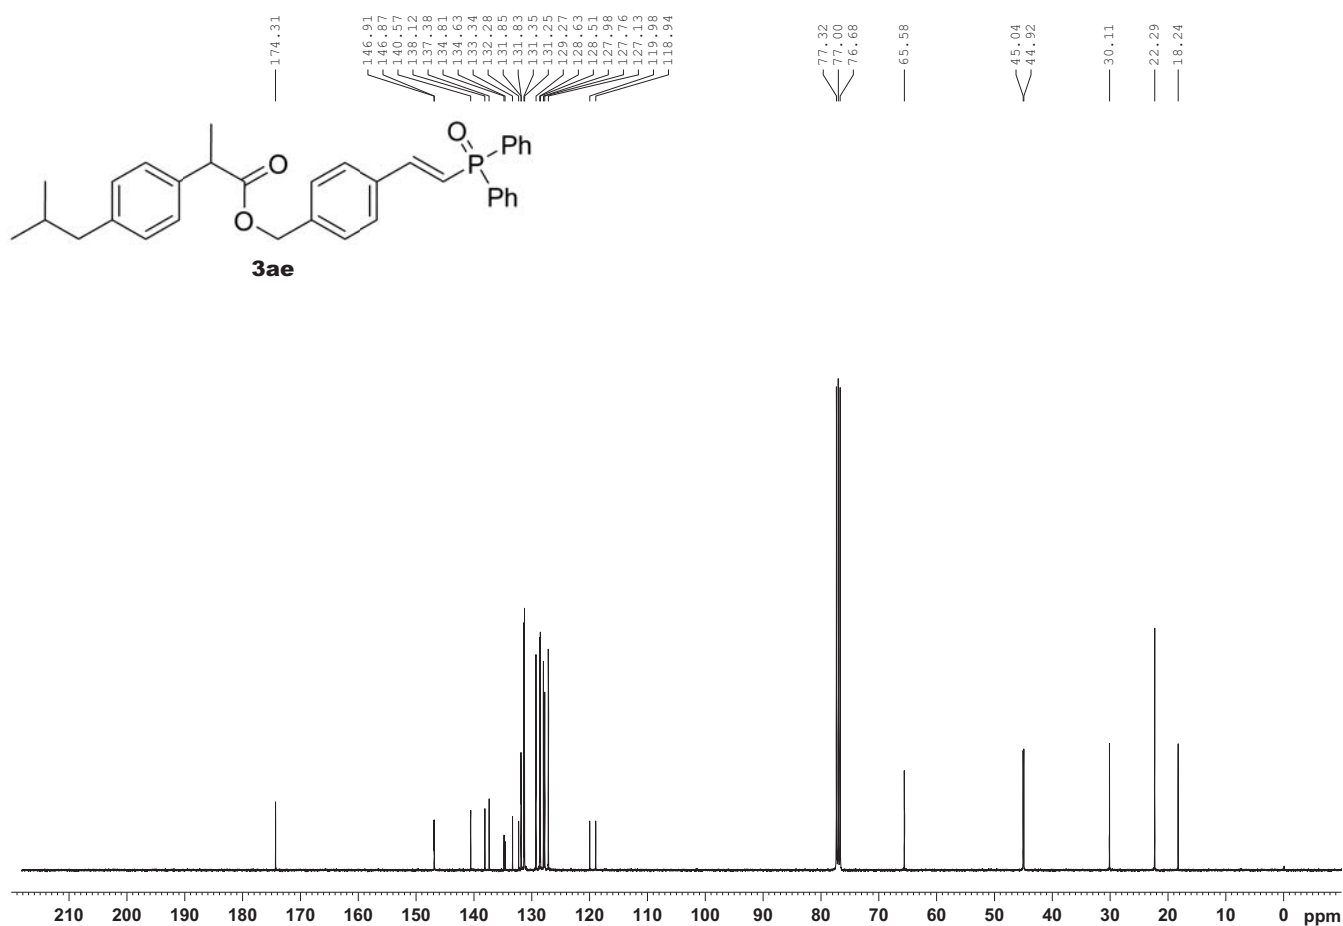

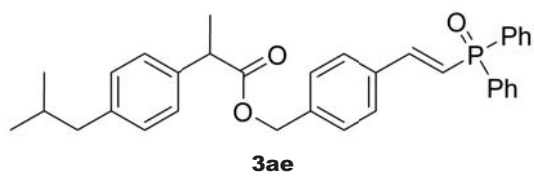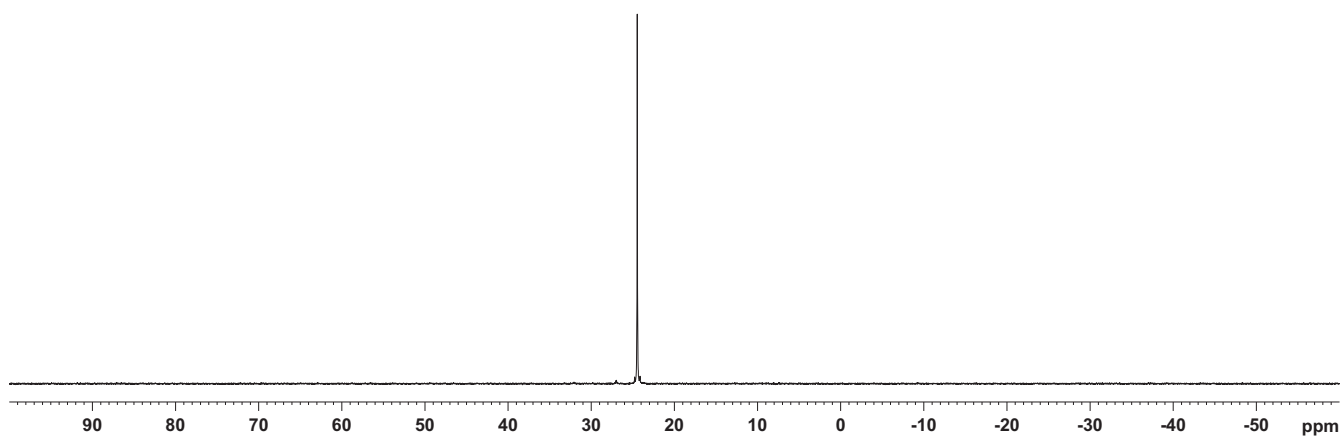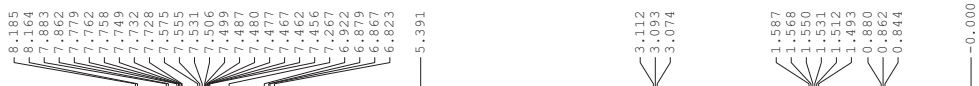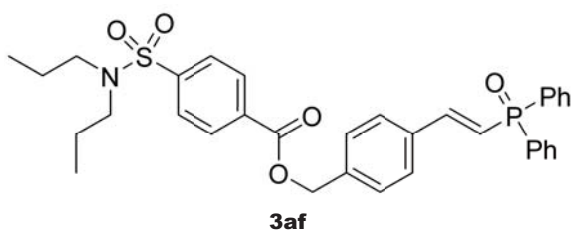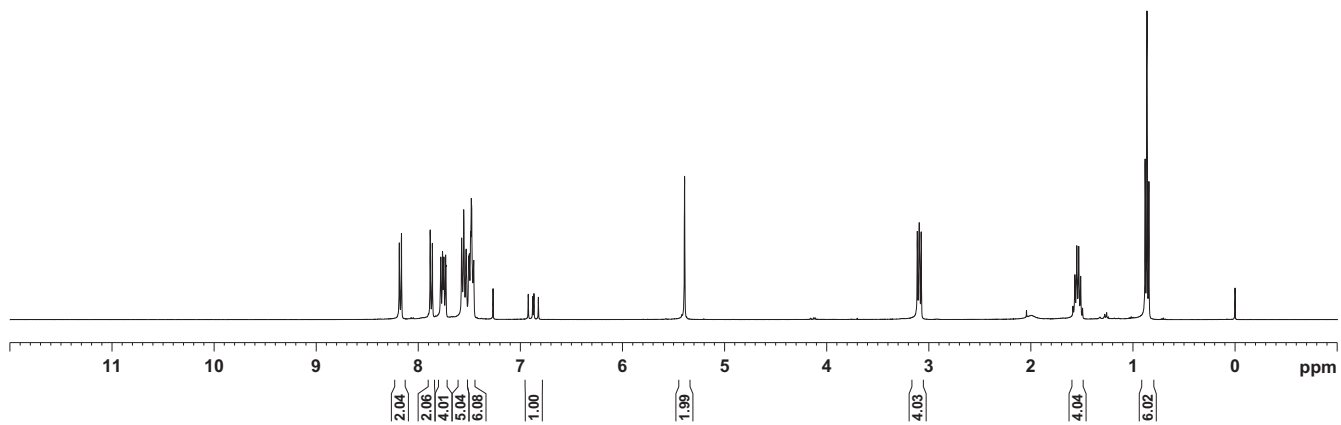

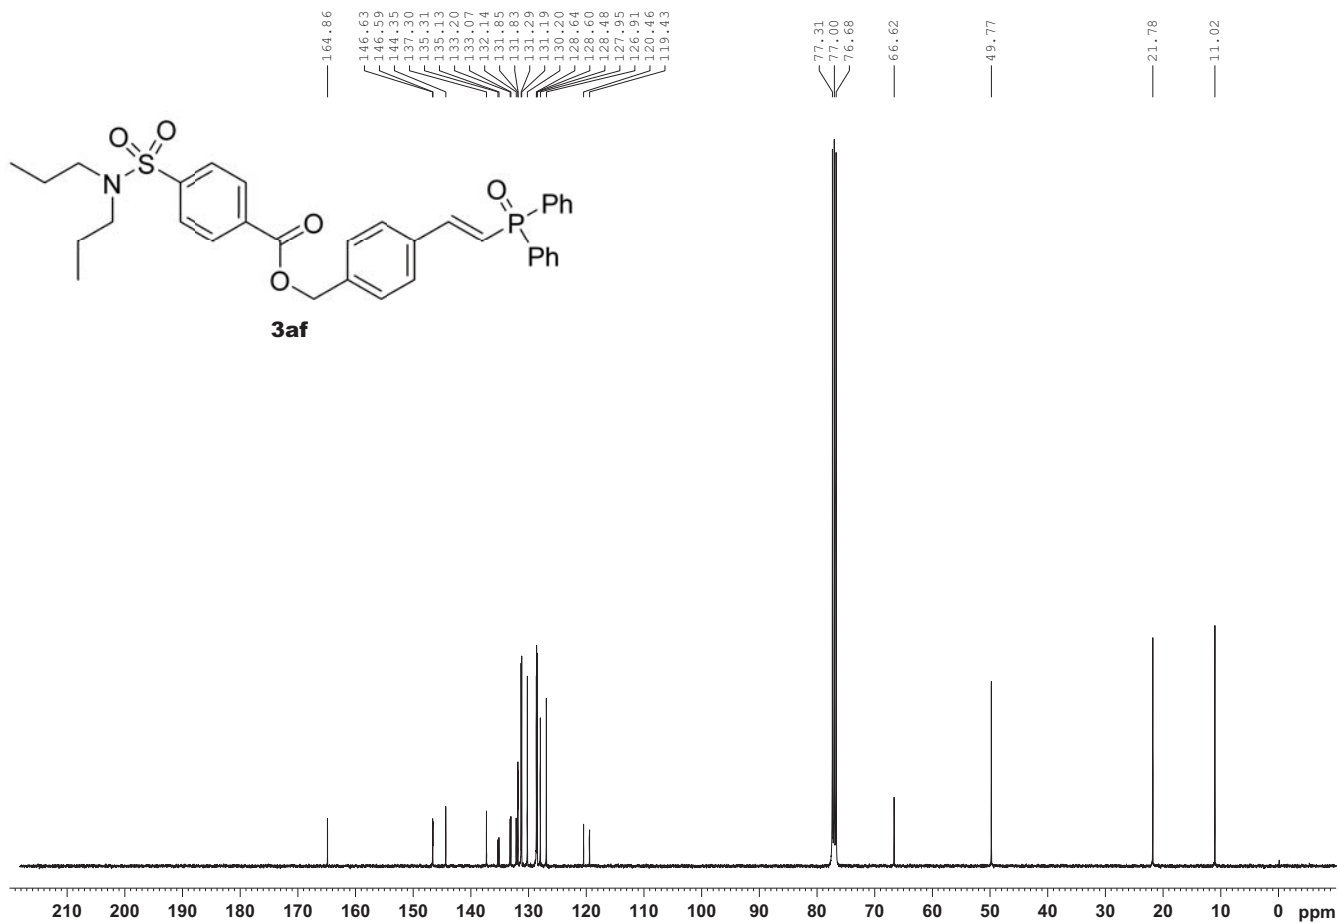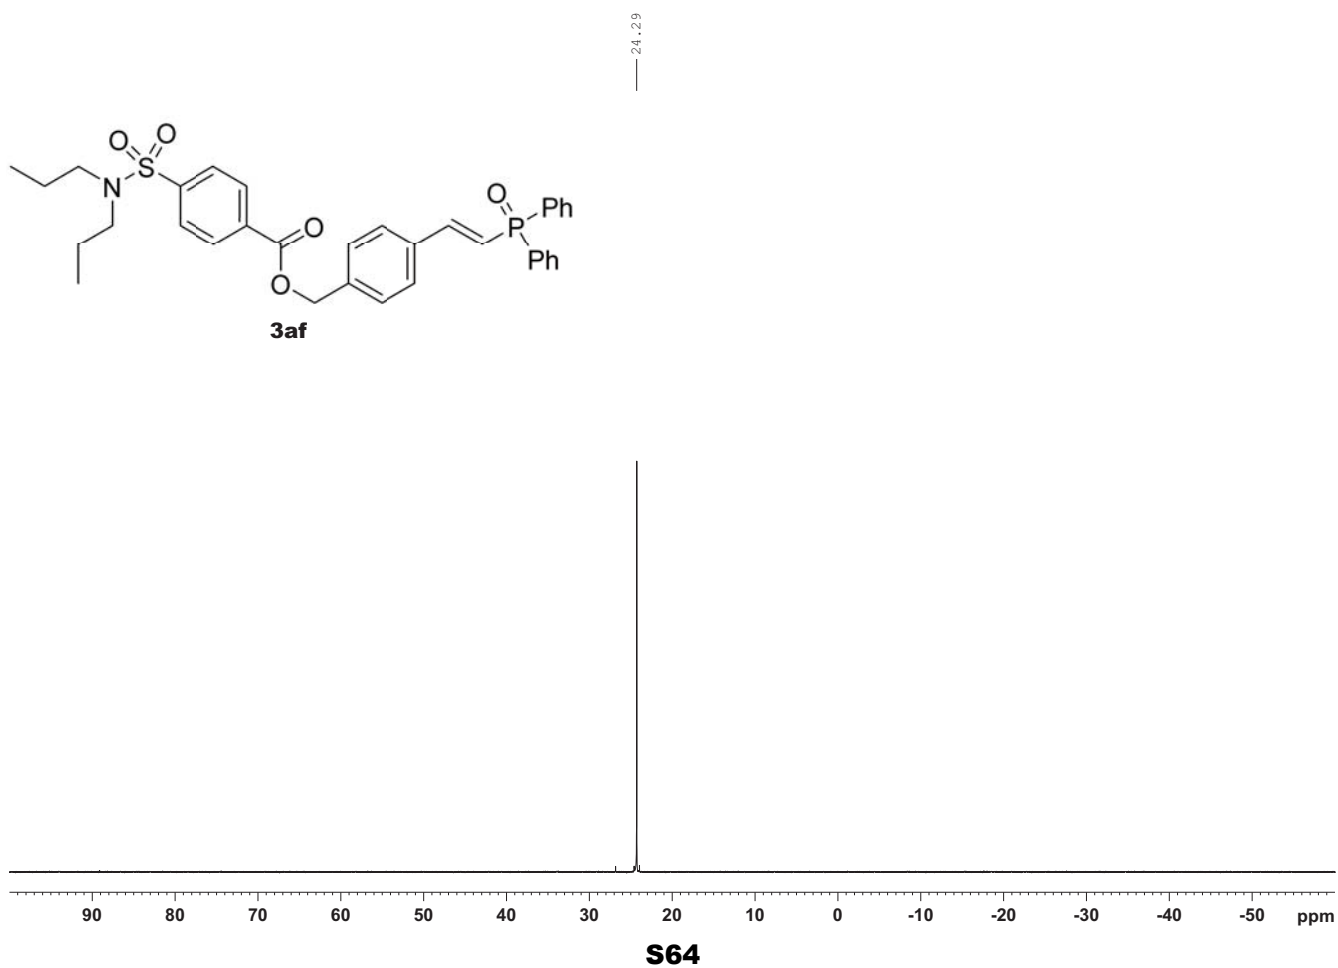



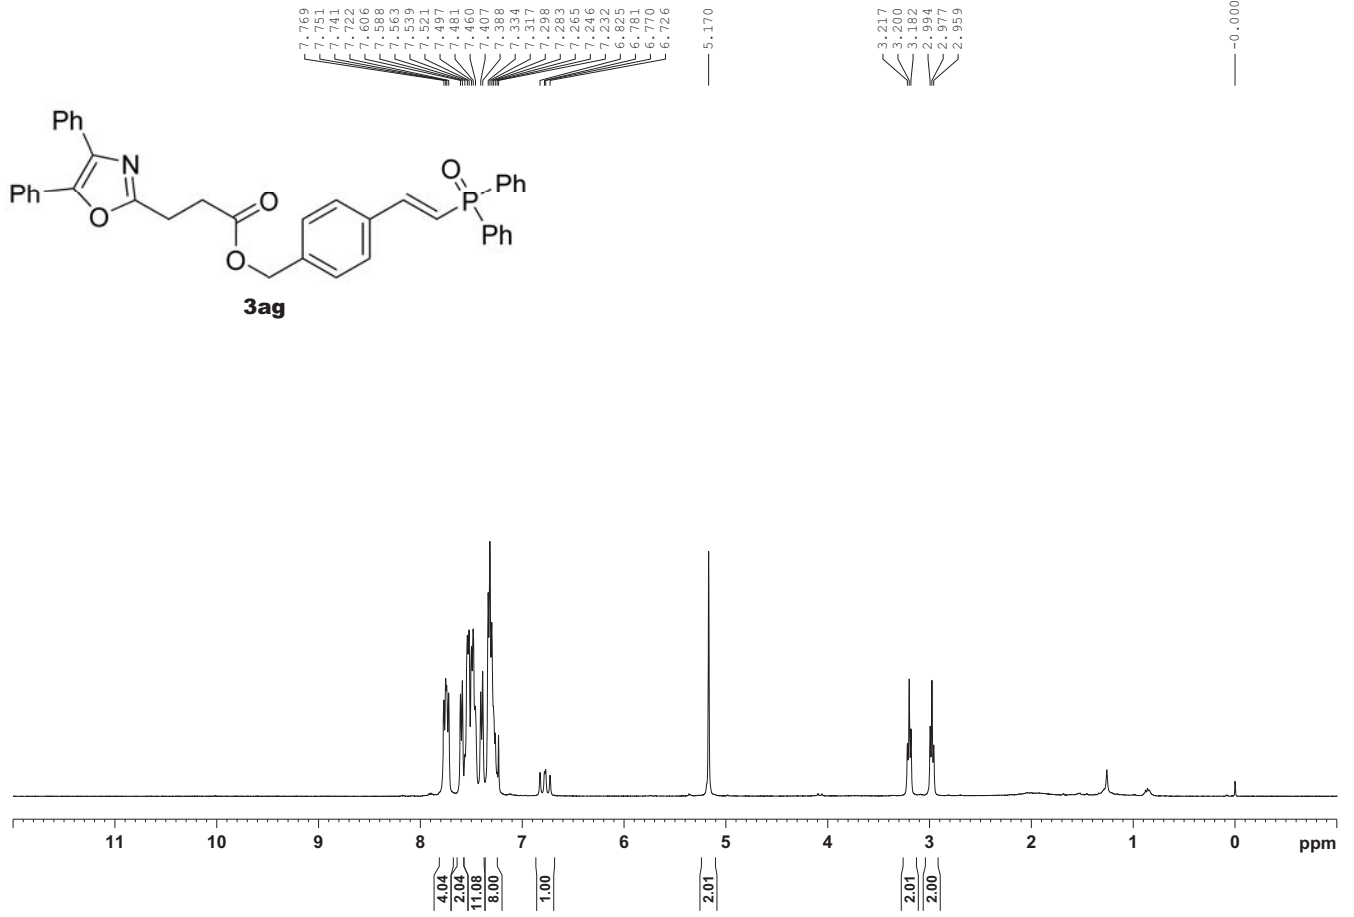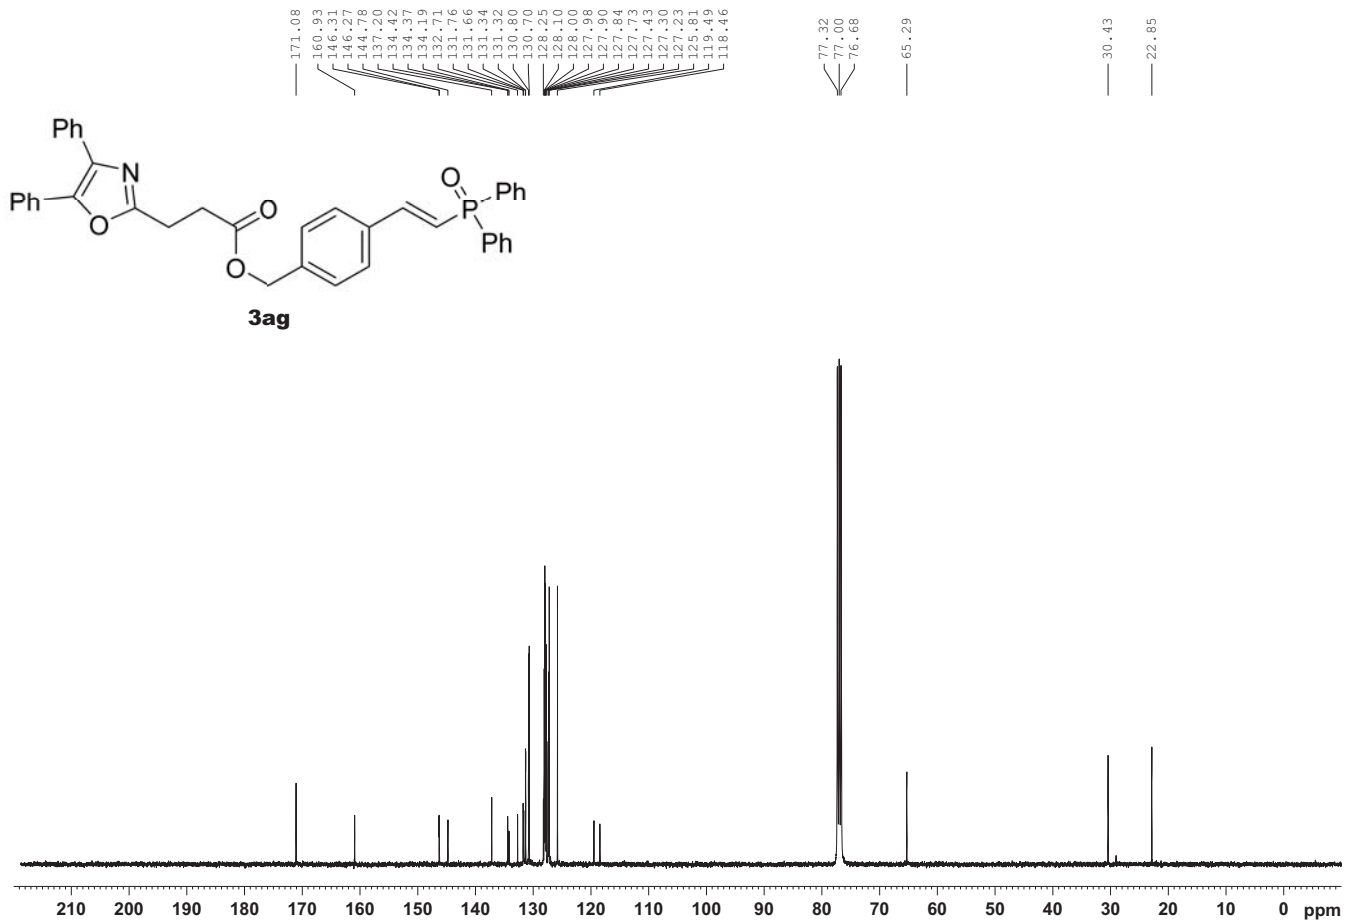

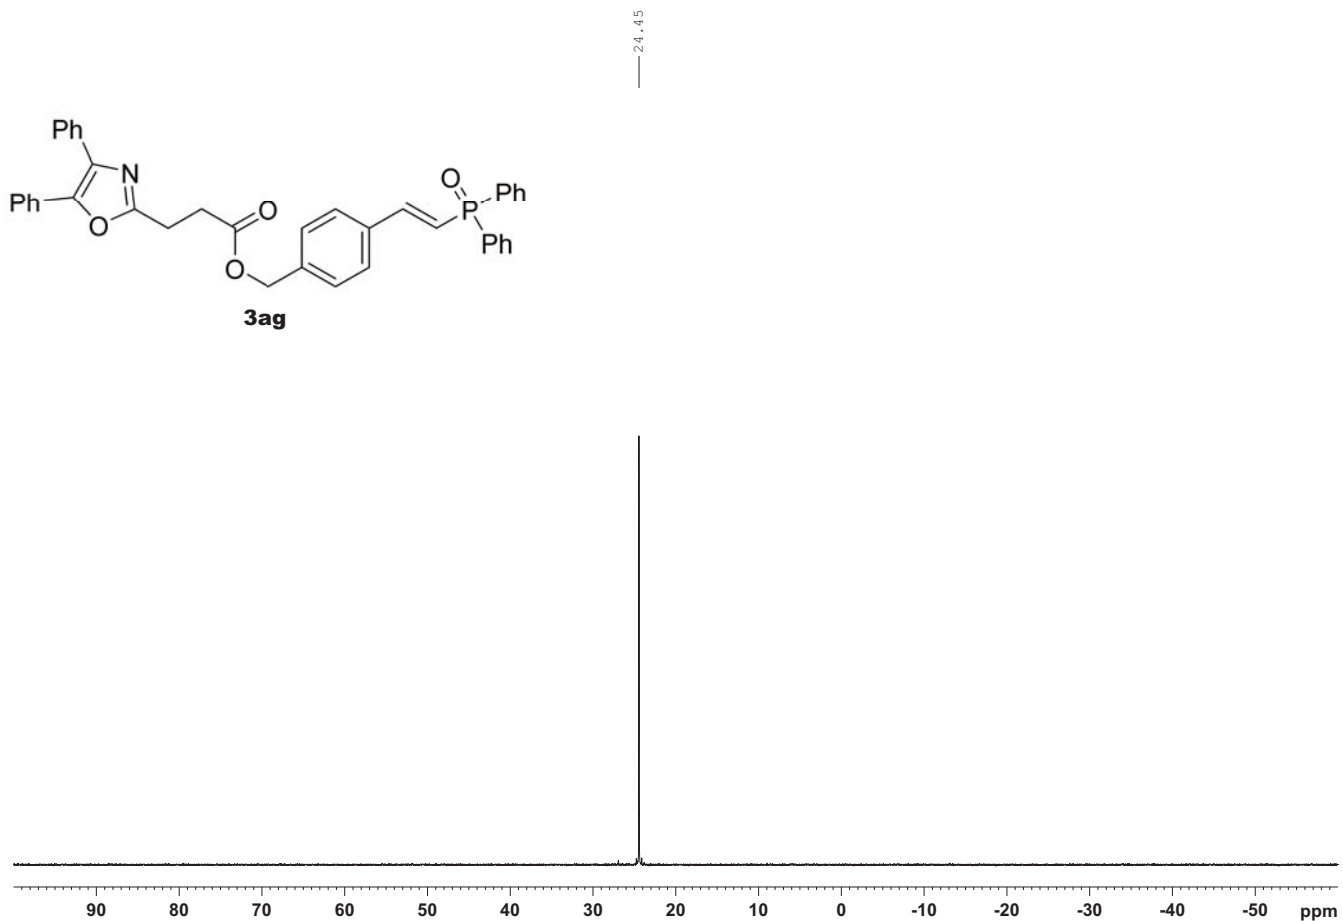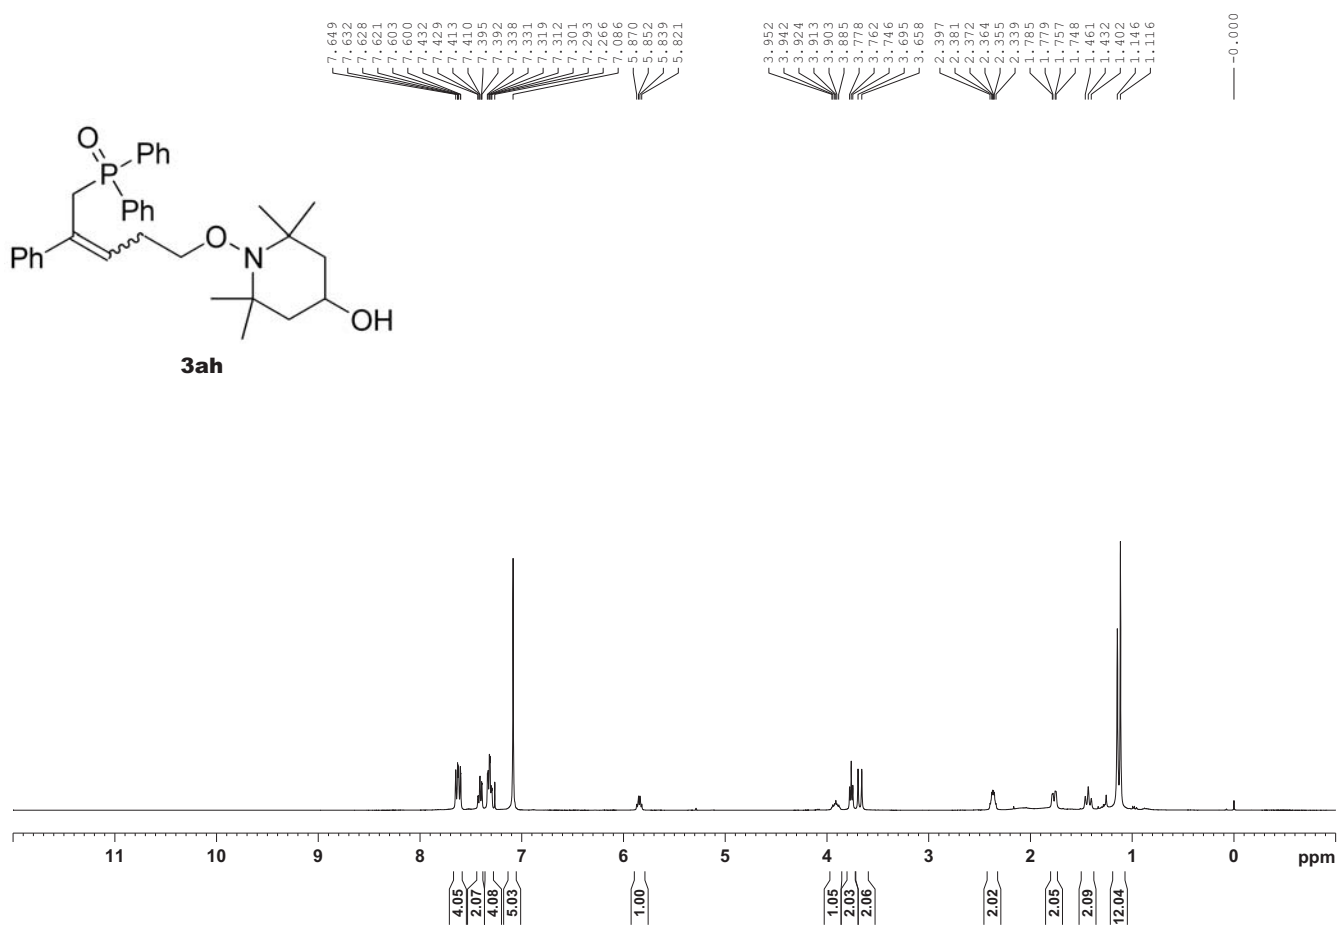

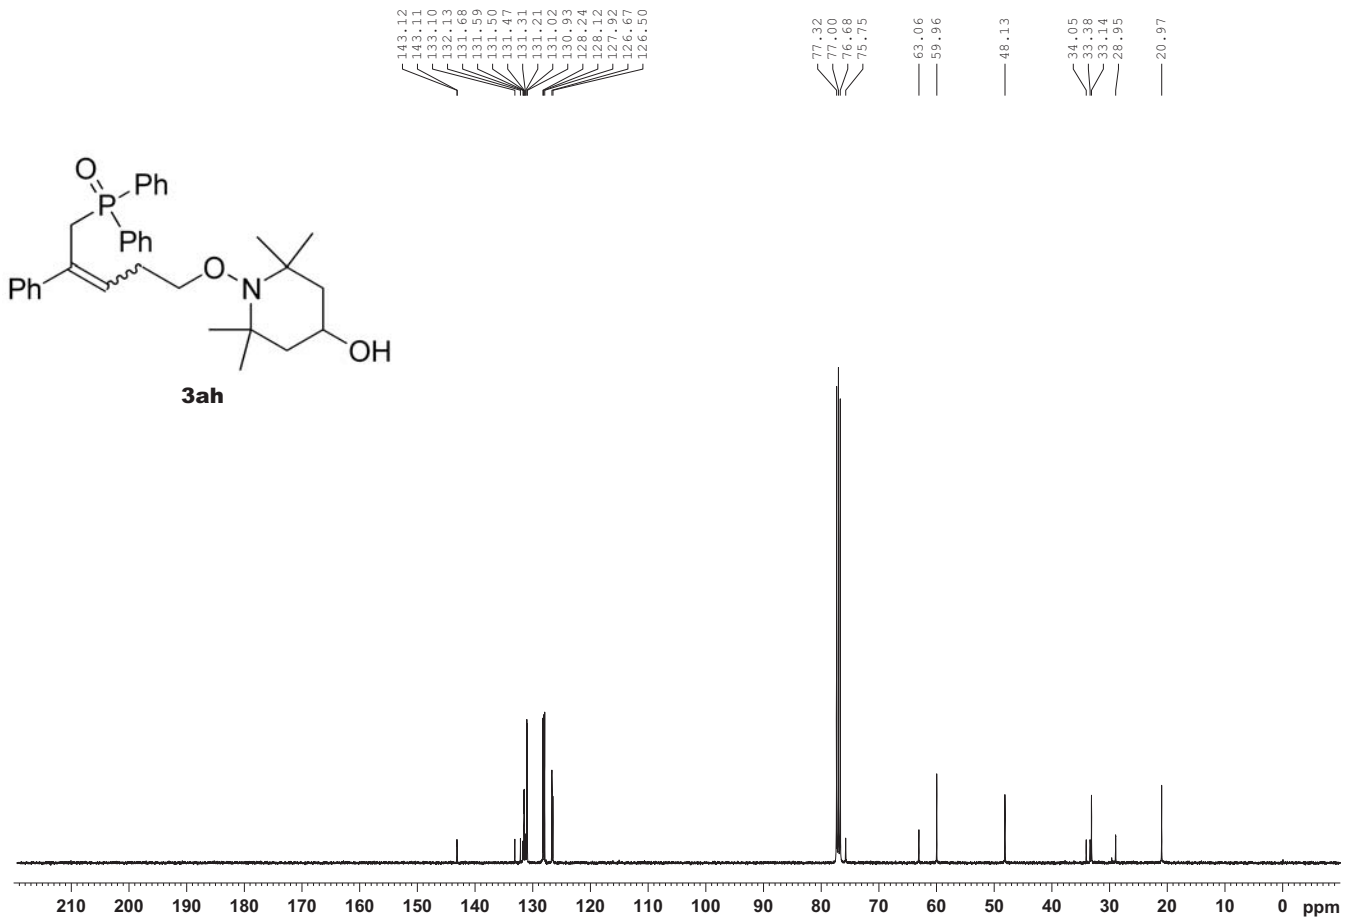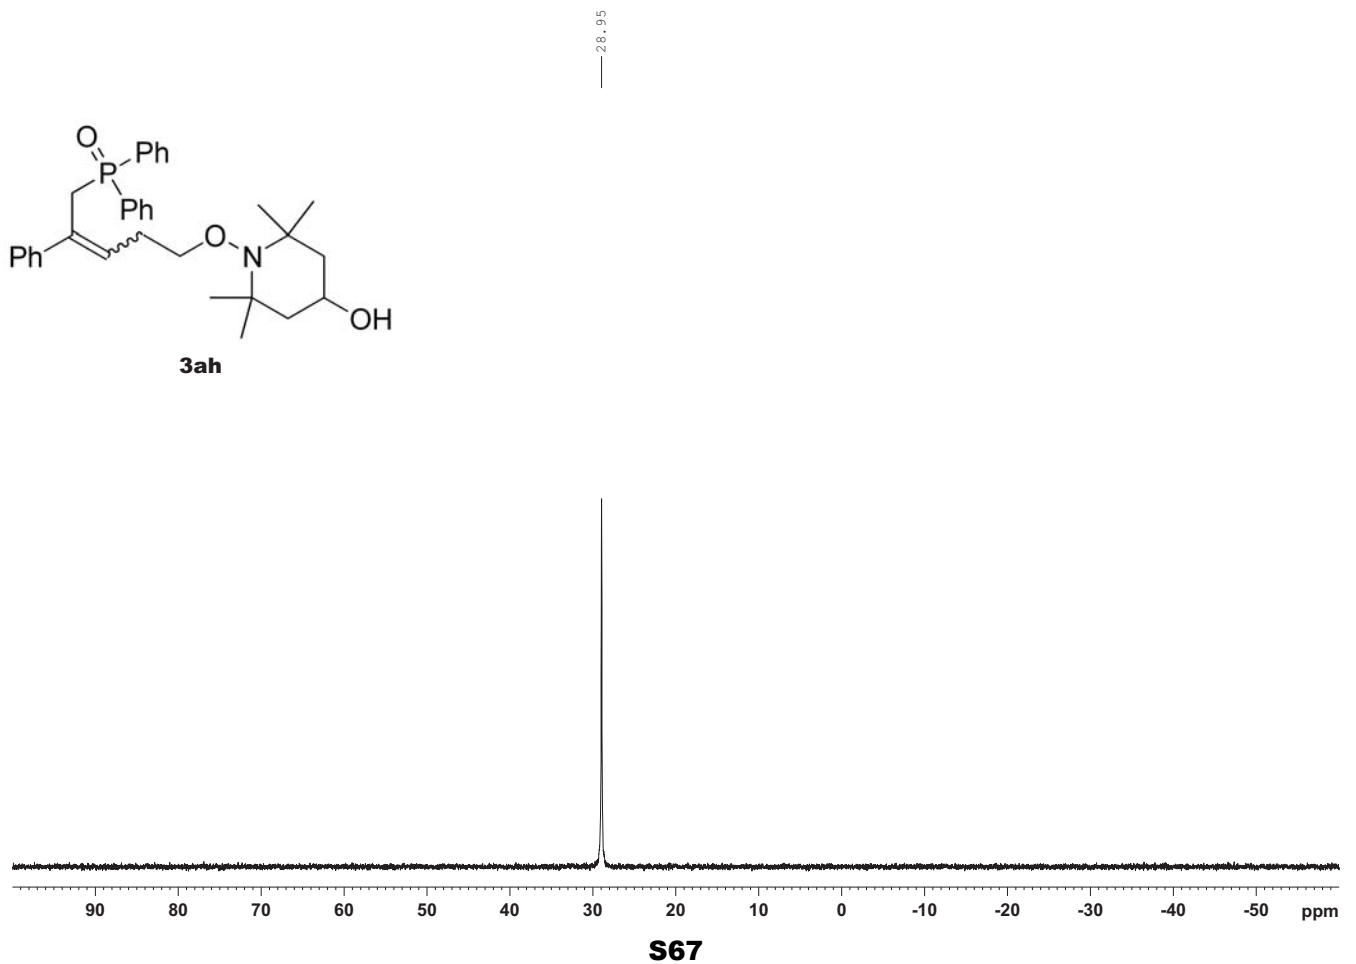

Supplement: d3ob00607g1.pdf [file d3ob00607g1.pdf]
